# Supplementary material for: Effectiveness of Bariatric Surgery vs Community Weight Management Intervention for the Treatment of Idiopathic Intracranial Hypertension: A Randomized Clinical Trial
Source: PubMed Central journal article supplement (PMC8077040; doi:10.1001/jamaneurol.2021.0659), 2021-04-26
Supplement: jamaneurol-e210659-s001.pdf [file jamaneurol-e210659-s001.pdf]

1  
2 A randomised controlled trial of bariatric surgery versus a community weight loss  
3 programme for the sustained treatment of Idiopathic Intracranial Hypertension: the  
4 IIH:WT Trial  
5

# 6 IIH:WT trial 7

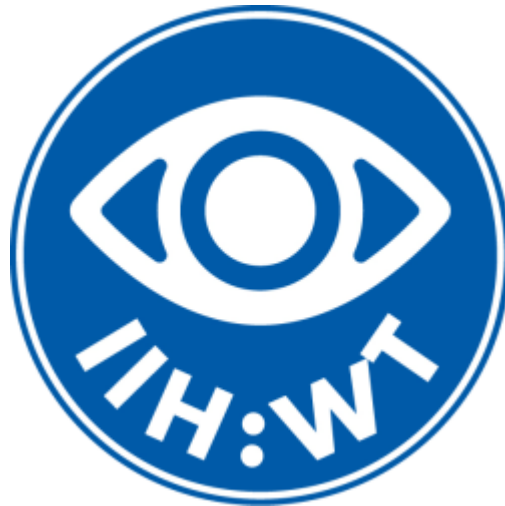

8  
9 TRIAL PROTOCOL: VERSION 4.1 13<sup>th</sup> September 2019  
10  
11

12 **Sponsor:** University of Birmingham (RG\_12-089)  
13  
14 **Chief Investigator:** Professor Alex Sinclair, University of Birmingham  
15  
16 **Coordinating Centre:** **Birmingham Clinical Trials Unit (BCTU)**  
17  
18 **Funder:** National Institute for Health Research (NIHR-CS-011-028)  
19  
20 **REC Ref. No.:** **14/WM/0011**  
21  
22 **ISRCTN40152829**  
23  
24 **IRAS ID: 142942**  
25  
26

27  
28  
29  
30  
31  
  
**National Institute for  
Health Research**

**UNIVERSITY OF  
BIRMINGHAM**

  
Birmingham Clinical Trials Unit

## 32 TRIAL COLLABORATIVE GROUP AND CONTACT DETAILS

|                                                      |                                                                                                                                                                                           |
|------------------------------------------------------|-------------------------------------------------------------------------------------------------------------------------------------------------------------------------------------------|
| <b>Chief Investigator</b><br>Professor Alex Sinclair | Professor of Neurology<br>University of Birmingham<br>Email: <a href="mailto:a.b.sinclair@bham.ac.uk">a.b.sinclair@bham.ac.uk</a>                                                         |
| <b>Co-Investigators</b><br>Mr Mike Burdon            | Consultant Neuro-ophthalmologist<br>Queen Elizabeth Hospital, Birmingham<br>Email: <a href="mailto:mike.burdon@uhb.nhs.uk">mike.burdon@uhb.nhs.uk</a>                                     |
| Professor Carl E Clarke                              | Professor of Clinical Neurology, Honorary Consultant Neurologist<br>Sandwell and West Birmingham Hospitals NHS Trust<br>Email: <a href="mailto:carlclarke@nhs.net">carlclarke@nhs.net</a> |
| Professor Emma Frew                                  | Professor in Health Economics<br>University of Birmingham<br>Email: <a href="mailto:e.frew@bham.ac.uk">e.frew@bham.ac.uk</a>                                                              |
| Natalie Ives                                         | Statistics Lead<br>Birmingham Clinical Trials Unit<br>University of Birmingham<br>Email: <a href="mailto:n.j.ives@bham.ac.uk">n.j.ives@bham.ac.uk</a>                                     |
| Mr Andrew Jacks                                      | Consultant Neuro-ophthalmologist<br>Queen Elizabeth Hospital, Birmingham<br>Email: <a href="mailto:andrew.jacks2@uhb.nhs.uk">andrew.jacks2@uhb.nhs.uk</a>                                 |
| Mr Tim Matthews                                      | Consultant Neuro-ophthalmologist<br>Queen Elizabeth Hospital, Birmingham<br>Email: <a href="mailto:tim.matthews@uhb.nhs.uk">tim.matthews@uhb.nhs.uk</a>                                   |
| Mrs Susan Mollan                                     | Consultant Neuro-ophthalmologist<br>Queen Elizabeth Hospital, Birmingham<br>Email: <a href="mailto:susan.mollan@uhb.nhs.uk">susan.mollan@uhb.nhs.uk</a>                                   |
| <b>Collaborators</b><br>Mr Rishi Singhal             | Consultant Bariatric Surgeon<br>Birmingham Heartlands Hospital<br>Email: <a href="mailto:rishi.singhal@heartofengland.nhs.uk">rishi.singhal@heartofengland.nhs.uk</a>                     |
| <b>Sub-study collaborators</b><br>Mr Andrew Clouter  | Research Associate<br>University of Birmingham<br><a href="mailto:clouter@adf.bham.ac.uk">clouter@adf.bham.ac.uk</a>                                                                      |
| Dr Peter Nightingale                                 | Statistician<br>University of Birmingham<br>Email: <a href="mailto:p.g.nightingale@bham.ac.uk">p.g.nightingale@bham.ac.uk</a>                                                             |
| Dr Yusuf Rajabally                                   | Consultant Neurologist<br>Queen Elizabeth Hospital, Birmingham<br>Email: <a href="mailto:yusuf.rajabally@uhb.nhs.uk">yusuf.rajabally@uhb.nhs.uk</a>                                       |

|                                                         |                                                                                                                                                                                       |
|---------------------------------------------------------|---------------------------------------------------------------------------------------------------------------------------------------------------------------------------------------|
| Professor Kim Shapiro                                   | Professor and Chair of Cognitive Neuroscience<br>University of Birmingham<br>Email: <a href="mailto:k.l.shapiro@bham.ac.uk">k.l.shapiro@bham.ac.uk</a>                                |
| Professor Mark Wagshul                                  | Associate Professor<br>Albert Einstein College of Medicine, New York, USA<br>Email: <a href="mailto:mark.wagshul@einstein.yu.edu">mark.wagshul@einstein.yu.edu</a>                    |
| <b>Clinical Trials Unit (BCTU)<br/>Trial Management</b> |                                                                                                                                                                                       |
| Sarah Tearne                                            | Neuroscience Trials Team Leader<br>Birmingham Clinical Trials Unit<br>University of Birmingham<br>Email: <a href="mailto:s.clarke.2@bham.ac.uk">s.clarke.2@bham.ac.uk</a>             |
| Ryan Ottridge                                           | Senior Trial Manager<br>Birmingham Clinical Trials Unit<br>University of Birmingham<br>Email: <a href="mailto:r.ottridge@bham.ac.uk">r.ottridge@bham.ac.uk</a>                        |
| Rebecca Woolley                                         | Statistician<br>Birmingham Clinical Trials Unit<br>University of Birmingham<br>Email: <a href="mailto:r.l.woolley.1@bham.ac.uk">r.l.woolley.1@bham.ac.uk</a>                          |
| <b>Trial Steering Committee</b>                         |                                                                                                                                                                                       |
| Professor Alex Sinclair (Chief Investigator)            | Professor Neurology<br>University of Birmingham<br>Email: <a href="mailto:a.b.sinclair@bham.ac.uk">a.b.sinclair@bham.ac.uk</a>                                                        |
| Professor Gordon Plant (Chair)                          | Consultant Neurologist<br>King's College Hospital<br>Email: <a href="mailto:gordon.plant@uclh.nhs.uk">gordon.plant@uclh.nhs.uk</a>                                                    |
| Krystal Hemmings                                        | Patient Representative<br>Trustee, IIH UK (Patient charity)<br>Email: <a href="mailto:krystalhemmings@iih.org.uk">krystalhemmings@iih.org.uk</a>                                      |
| Mr Amir Khan                                            | Medical Director<br>Walsall Manor Hospital<br>Email: <a href="mailto:amir.khan@walsallhealthcare.nhs.uk">amir.khan@walsallhealthcare.nhs.uk</a>                                       |
| Jill Mollison                                           | Statistician<br>University of Oxford<br>Email: <a href="mailto:jill.mollison@phc.ox.ac.uk">jill.mollison@phc.ox.ac.uk</a>                                                             |
| <b>Data Monitoring Committee</b>                        |                                                                                                                                                                                       |
| Dr Pearse Keane (Chair)                                 | NIHR Clinical Lecturer<br>Moorfields Eye Hospital and UCL Institute of<br>Ophthalmology, London<br><a href="mailto:pearse.keane@moorfields.nhs.uk">pearse.keane@moorfields.nhs.uk</a> |

|                  |                                                                                                                                                                   |
|------------------|-------------------------------------------------------------------------------------------------------------------------------------------------------------------|
| Neil Corrigan    | Medical Statistician<br>Leeds Institute of Clinical Trials Research, University of<br>Leeds<br><a href="mailto:n.corrigan@leads.ac.uk">n.corrigan@leads.ac.uk</a> |
| Mr Kamal Mahawar | Consultant Bariatric Surgeon<br>City Hospitals Sunderland<br><a href="mailto:kamal.mahawar@chsft.nhs.uk">kamal.mahawar@chsft.nhs.uk</a>                           |

33  
34

### Protocol Amendments

The following amendments and/or administrative changes have been made to this protocol since the implementation of the first approved version.

| Amendment number | Date of amendment               | Protocol version | Type of amendment | Summary of amendment                                               |
|------------------|---------------------------------|------------------|-------------------|--------------------------------------------------------------------|
| N/A              | 20 <sup>th</sup> March 2014     | V1.2             | Non-substantial   | Addition of ISRCTN                                                 |
| 1                | 27 <sup>th</sup> March 2014     | V1.3             | Substantial       | Addition of bypass surgery choice                                  |
| 2                | 23 <sup>rd</sup> July 2014      | V1.4             | Substantial       | Addition of STOP-Bang and Ravens                                   |
| 3                | 11 <sup>th</sup> November 2014  | V1.5             | Substantial       | Addition of surgical controls and assessment flexibility           |
| 4                | 30 <sup>th</sup> June 2015      | V1.6             | Substantial       | Addition of post-op visit and change of headache grading           |
| 5                | 20 <sup>th</sup> January 2016   | V1.7             | Substantial       | Reduction of eligibility criteria from 6m to 2m                    |
| 6                | 2 <sup>nd</sup> February 2016   | V2.0             | Substantial       | Addition of sites and sleeve gastrectomy surgery choice            |
| 7                | 6 <sup>th</sup> February 2017   | V3.0             | Substantial       | Increase recruitment from 60 to 64                                 |
| 8                | 14 <sup>th</sup> February 2017  | V4.0             | Substantial       | Changes to ensure adherence to updated BCTU SOPs                   |
| 9                | 10 <sup>th</sup> May 2019       | V4.0             | Substantial       | Re-opening fat/skin sample recruitment                             |
| 10               | 13 <sup>th</sup> September 2019 | V5.0             | Substantial       | Addition of long term follow up and streamlined subset of controls |

35  
36  
37  
38  
39  
40  
41  
42  
43  
44  
45  
46  
47  
48  
49  
50  
51  
52  
53

## COMPLIANCE STATEMENT

This protocol describes the IIH:WT trial only. The protocol should not be used as a guide for the treatment of patients not taking part in the IIH:WT trial.

The trial will be conducted in accordance with the approved protocol, UK Policy Framework for Health and Social Care Research 2017, the Data Protection Act 2018 and the EU General Data Protection Regulation 2018, and the principals of Good Clinical Practice as defined by the European Good Clinical Practice (GCP) Directive. Every care has been taken in the drafting of this protocol, but future amendments may be necessary, which will receive the required approvals prior to implementation.

54 **ROLES**

55 **University of Birmingham is the sponsor. Professor Alex Sinclair is the Chief Investigator.**

56 Birmingham Clinical Trials Unit is responsible for obtaining necessary approvals, the Trial Management  
57 Group is jointly responsible for overseeing good clinical practice and the Investigators are responsible for  
58 obtaining informed consent and care of the participants.

59

60 The Trial Management Group consists of the Chief Investigator, Health Economist, Statisticians, and BCTU  
61 Trial Management staff.

62

63

64

**Neuroscience Trials Office**

65

For general protocol related queries and supply of trial materials:

66

67

Birmingham Clinical Trials Unit (BCTU), College of Medical & Dental Sciences, Public Health Building,  
68 University of Birmingham,  
69 Birmingham B15 2TT

70

71

Telephone: 0121 415 9125

72

Fax: 0121 415 9135

73

Email: [neuroscience@trials.bham.ac.uk](mailto:neuroscience@trials.bham.ac.uk)

74

Website: [www.birmingham.ac.uk/IIHWT](http://www.birmingham.ac.uk/IIHWT)

75

76

77

**Randomisation / Registration**

78

Telephone: 0800 953 0274 (toll free in the UK, available 9am-5pm Monday – Friday)

79

80

81

**Safety Reporting**

82

Fax SAE Forms to: 0121 415 9135 or email to [neuroscience@trials.bham.ac.uk](mailto:neuroscience@trials.bham.ac.uk)

83

84

85

86

87

88

89

90

91

92

93

94

95

96

97

98

99

100

101

102

103

104

105 **Chief Investigator and Sponsor Signatures**

106 The Chief Investigator and the Sponsor have discussed this protocol. The Investigator agrees to perform the  
 107 investigations and to abide by this protocol.

108  
 109 The Investigator agrees to conduct the trial in compliance with the approved protocol, the UK Data  
 110 Protection Act (2018), the Trust Information Governance Policy (or other local equivalent) and the UK Policy  
 111 Framework for Health and Social Care Research 2017.

112  
 113 For University of Birmingham sponsored trials, the sponsor will confirm approval of the protocol by signing  
 114 the IRAS form and therefore a signature on the protocol is not required.

115  
 116  
 Chief investigator  
 Professor Alex Sinclair,  
 Professor of Neurology  
 University of Birmingham

---

Signature Date

117  
 118  
 119  
 120  
 121

122 **Principal Investigator Signature Page**

123

124 Principal Investigator:

125 I have read and agree to the protocol, as detailed in this document. I agree to adhere to the protocol as  
 126 outlined and agree that any suggested changes to the protocol must be approved by the Research Ethics  
 127 Committee (REC).

128

129 I am aware of my responsibilities as an Investigator under the guidelines of the UK Policy Framework for  
 130 Health and Social Care Research 2017, Good Clinical Practice (GCP), the Declaration of Helsinki and the trial  
 131 protocol and I agree to conduct the trial according to these guidelines and to appropriately direct and assist  
 132 the staff under my control who will be involved in the trial.

133

134

Principal investigator

<insert name>

---

Signature

Date

Name of Institution

<insert name>

---

135

136

137

138

139

140

141

142

143

144

145

146

147

148

149

150

151 Each Principal Investigator should sign this page and return a copy to the Neuroscience Trials Office

152

153 **LIST OF ABBREVIATIONS**

|     |                 |                                                        |
|-----|-----------------|--------------------------------------------------------|
| 154 | <b>AE</b>       | Adverse Event                                          |
| 155 | <b>AHI</b>      | Apnea-Hypopnea Index                                   |
| 156 | <b>BCTU</b>     | Birmingham Clinical Trials Unit                        |
| 157 | <b>BHH</b>      | Birmingham Heartlands Hospital                         |
| 158 | <b>BMI</b>      | Body Mass Index                                        |
| 159 | <b>CI</b>       | Chief Investigator                                     |
| 160 | <b>CRF</b>      | Case Report Form                                       |
| 161 | <b>CSF</b>      | Cerebrospinal Fluid                                    |
| 162 | <b>DCF</b>      | Data Clarification Form                                |
| 163 | <b>DMC</b>      | Data Monitoring Committee                              |
| 164 | <b>GCP</b>      | Good Clinical Practice                                 |
| 165 | <b>HIT-6</b>    | Headache Impact Test-6                                 |
| 166 | <b>ICP</b>      | Intracranial Pressure                                  |
| 167 | <b>IIH</b>      | Idiopathic Intracranial Hypertension                   |
| 168 | <b>ISRCTN</b>   | International Standard Randomised Control Trial Number |
| 169 | <b>LAGB</b>     | Laparoscopic Adjustable Gastric Banding                |
| 170 | <b>LogMAR</b>   | Logarithmic mean angle of resolution                   |
| 171 | <b>LP</b>       | Lumbar Puncture                                        |
| 172 | <b>LSG</b>      | Laparoscopic Sleeve Gastrectomy                        |
| 173 | <b>MRI</b>      | Magnetic Resonance Imaging                             |
| 174 | <b>MRV</b>      | Magnetic Resonance Venography                          |
| 175 | <b>NICE</b>     | National Institute for Health and Care Excellence      |
| 176 | <b>NIHR</b>     | National Institute for Health Service Research         |
| 177 | <b>OSA</b>      | Obstructive Sleep Apnoea                               |
| 178 | <b>OCT</b>      | Optical Coherence Tomography                           |
| 179 | <b>PBMC</b>     | Peripheral Blood Mononuclear Cells                     |
| 180 | <b>PI</b>       | Principal Investigator                                 |
| 181 | <b>PIC site</b> | Participant Identification Centre                      |
| 182 | <b>PIS</b>      | Participant Information Sheet                          |
| 183 | <b>PN</b>       | Peripheral Neuropathy                                  |
| 184 | <b>QALY</b>     | Quality-Adjusted Life Year                             |
| 185 | <b>R&amp;D</b>  | Research and Development                               |
| 186 | <b>REC</b>      | Research Ethics Committee                              |
| 187 | <b>RYGBP</b>    | Roux-en-Y Gastric Bypass                               |
| 188 | <b>SAE</b>      | Serious Adverse Event                                  |
| 189 | <b>SART</b>     | Sustained Attention to Response Task                   |
| 190 | <b>TMF</b>      | Trial Master File                                      |
| 191 | <b>TMG</b>      | Trial Management Group                                 |
| 192 | <b>TSC</b>      | Trial Steering Committee                               |
| 193 | <b>UENS</b>     | Utah Early Neuropathy Score                            |
| 194 | <b>UHB</b>      | University Hospitals Birmingham NHS Foundation Trust   |
| 195 | <b>UoB</b>      | University of Birmingham                               |
| 196 | <b>WTP</b>      | Willingness to Pay                                     |

197  
198  
199  
200  
201  
202  
203  
204  
205



**CONTENTS**

206

207

208 COMPLIANCE STATEMENT ..... 4

209 ROLES ..... 5

210 LIST OF ABBREVIATIONS ..... 8

211 TRIAL SUMMARY ..... 12

212 TRIAL SCHEMA ..... 14

213

214 1. BACKGROUND ..... 16

215 1.1. Idiopathic Intracranial Hypertension (IIH)..... 16

216 1.2. Current therapy for IIH ..... 16

217 1.3. Weight loss ..... 16

218 1.4. Bariatric surgery for IIH ..... 17

219 1.5. The choice of questions to be asked ..... 17

220 1.5.1 Rationale ..... 17

221 1.5.2 Risks and benefits..... 18

222 1.6. Objective ..... 18

223 1.7. Exploratory objectives..... 18

224

225 2. TRIAL DESIGN ..... 19

226 2.1. Design ..... 19

227 2.2. Primary Aims ..... 19

228 2.3. Secondary Aims ..... 19

229 2.4. Setting ..... 19

230 2.5. Target population ..... 19

231 2.6. Treatment arms..... 19

232 2.7. Primary Outcome Measure ..... 20

233 2.8. Secondary Outcome Measures ..... 20

234

235 3. ELIGIBILITY..... 20

236

237 4. CONSENT AND RANDOMISATION ..... 21

238 4.1. Informed consent process..... 21

239 4.2. Identifying potential participants..... 21

240 4.3. Pre-screening ..... 21

241 4.4. Screening/baseline Visit ..... 22

242 4.5. Written informed consent ..... 22

243 4.6. Randomisation ..... 23

244 4.7. Informing the participant’s GP ..... 23

245 4.8. Ineligible patients ..... 23

246 4.9. Optional consent to collection of NHS routine clinical datasets..... 23

247

248 5. TREATMENT ALLOCATIONS..... 24

249 5.1. Trial intervention: bariatric surgery ..... 24

250 5.2. Trial intervention: dietary weight loss programme ..... 24

251 5.3. Compliance monitoring..... 24

252 5.4. Concomitant therapy ..... 25

253 5.4.125

254 5.5. Excluded medications or interactions..... 25

255 5.6. Withdrawal of treatment or protocol violation ..... 25

256

257 6. FOLLOW-UP AND ASSESSMENTS ..... 25

258 6.1. Format of assessment visits ..... 25

259 6.2. Screening/baseline visit ..... 25

260 6.3. Follow up visits ..... 28

261 6.4. Post-surgery visits ..... 28

262 6.5. Withdrawal..... 28

263 6.6. Timing of assessments ..... 28

264 6.7. Participant completed questionnaires ..... 28

265 6.8. Assessment methods ..... 29

266 6.9. Blood and CSF samples..... 31

267 6.10. Processing and storage of samples ..... 31

268

269 7. ADVERSE EVENT REPORTING ..... 32

270 7.1. Assessment of Safety ..... 32

271 7.2. Serious Adverse Events ..... 32

272 7.3. SAE reporting procedures ..... 33

273 7.4. Assessment of relatedness..... 33

274 7.5. Assessment of expectedness ..... 33

275 7.6. Expected Adverse Events ..... 34

276 7.7. Related and Unexpected SAEs ..... 34

277 7.8. Annual Progress Reports ..... 34

278 7.9. Reporting urgent safety measures to the REC ..... 34

279 7.10. Data Monitoring Committee ..... 34

280 7.11. Notification of Serious Breaches of GCP and/or the protocol ..... 35

281

282 8. DATA MANAGEMENT AND VALIDATION ..... 35

283 8.1. Source Data ..... 35

284 8.2. Confidentiality of personal data ..... 35

285 8.3. Long-term storage of data ..... 36

286 8.4. Data management..... 36

287 8.5. Definition of the End of Trial ..... 36

288

289 9. STATISTICAL CONSIDERATIONS..... 37

290 9.1. Sample size ..... 37

291 9.2. Projected accrual and attrition rates ..... 37

292 9.3. Statistical Analysis ..... 37

293 9.4. Missing Data and Sensitivity Analyses ..... 38

294 9.5. Subgroup Analyses ..... 38

295 9.6. Interim Analyses ..... 38

296 9.7. Final Analyses ..... 38

297

298 10. HEALTH ECONOMIC OUTCOMES ..... 38

299 10.1. Health economic outcomes ..... 38

300 10.2. Overall objective ..... 39

301 10.3. Methods ..... 39

302 10.4. Economic evaluation ..... 41

303

304 11. EXPLORATORY SUB-STUDIES..... 41

305 11.1. Exploratory Aims ..... 41

306 11.2. Exploratory Outcome Measures ..... 42

307 11.3. Changes to participant pathway to incorporate sub-studies..... 42

308 11.4. Sleep apnoea observational cohort sub-study..... 44

309 11.5. Metabolic syndrome sub-study ..... 44

310 11.6. Magnetic resonance imaging in IIH sub-study ..... 46

311 11.7. Cognitive function sub-study ..... 47

312 11.8. Exploratory samples ..... 48

313 11.9. Processing and storage of additional samples ..... 49

314

315 12. EXPLORATORY SUB-STUDIES: ADDITIONAL RECRUITMENT GROUPS ..... 50

316 12.1. Matched obese control group sub-study ..... 50

317 12.1.1 Eligibility for matched obese control group sub-study ..... 51

318 12.2. MRI Test Run sub-study ..... 52

319 12.2.1 Eligibility for MRI Test Run sub-study ..... 52

320 12.3. Control Fat and Skin Sample sub-study..... 53

321 12.3.1 Eligibility for Control Fat and Skin Sample sub-study ..... 53

322

323 13. DATA ACCESS AND QUALITY ASSURANCE..... 53

324 13.1. Monitoring and Audit ..... 53

325 13.2. Site Set-up and Initiation..... 53

326 13.3. Central Monitoring..... 54

327 13.4. Notification of Serious Breaches ..... 54

328 13.5. Independent Trial Steering Committee..... 54

329 13.6. Data Monitoring Committee: determining when clear answers have emerged ..... 54

330

331 14. ORGANISATION AND RESPONSIBILITIES ..... 55

332 14.1. Principal Investigator at each centre ..... 55

333 14.2. Nursing Co-ordinator at each centre ..... 55

334 14.3. The Neuroscience Trials Office..... 55

335 14.4. Research Governance ..... 55

336 14.5. Ethical and Trust Management ..... 56

337 14.6. Funding and Cost implications ..... 56

338 14.7. Indemnity ..... 56

339 14.8. Publication..... 56

340

341 15. PROJECT TIMETABLE AND MILESTONES ..... 57

342

343 16. APPENDIX A: FRISÉN GRADING ..... 58

344

345 17. REFERENCES ..... 59

346

347

348 **TRIAL SUMMARY**

| EXECUTIVE SUMMARY                                                                                                                                                                                                                                                                                                                                                  |                                                                                                                                                                                                                                                                                                                                                                                                                                                                                                                                                                                                                                                                                                                                          |
|--------------------------------------------------------------------------------------------------------------------------------------------------------------------------------------------------------------------------------------------------------------------------------------------------------------------------------------------------------------------|------------------------------------------------------------------------------------------------------------------------------------------------------------------------------------------------------------------------------------------------------------------------------------------------------------------------------------------------------------------------------------------------------------------------------------------------------------------------------------------------------------------------------------------------------------------------------------------------------------------------------------------------------------------------------------------------------------------------------------------|
| Title                                                                                                                                                                                                                                                                                                                                                              | A randomised controlled trial of bariatric surgery versus a community weight loss programme for the sustained treatment of Idiopathic Intracranial Hypertension: the IIH:WT Trial.                                                                                                                                                                                                                                                                                                                                                                                                                                                                                                                                                       |
| Acronym                                                                                                                                                                                                                                                                                                                                                            | IIH:WT                                                                                                                                                                                                                                                                                                                                                                                                                                                                                                                                                                                                                                                                                                                                   |
| Trial design and methods                                                                                                                                                                                                                                                                                                                                           | Randomised controlled parallel arm trial with patients randomised 1:1 to bariatric surgery or dietary weight loss programme.                                                                                                                                                                                                                                                                                                                                                                                                                                                                                                                                                                                                             |
| Total number of participants planned                                                                                                                                                                                                                                                                                                                               | 64 (plus at least 20 obese controls, 5 MRI test run volunteers, and 40 fat and skin sample controls).                                                                                                                                                                                                                                                                                                                                                                                                                                                                                                                                                                                                                                    |
| Trial duration per participant                                                                                                                                                                                                                                                                                                                                     | 60 months with assessments at baseline, then at 3, 6, 12, 24 and 60 months.                                                                                                                                                                                                                                                                                                                                                                                                                                                                                                                                                                                                                                                              |
| Accrual period                                                                                                                                                                                                                                                                                                                                                     | 45 months (randomised participants, 26 further months for all controls)                                                                                                                                                                                                                                                                                                                                                                                                                                                                                                                                                                                                                                                                  |
| Estimated total trial duration                                                                                                                                                                                                                                                                                                                                     | 6 months for set up, 45 months for recruitment, 60 months for follow up, 6 months for final analysis and write up of results: 117 months.                                                                                                                                                                                                                                                                                                                                                                                                                                                                                                                                                                                                |
| Primary study objectives                                                                                                                                                                                                                                                                                                                                           | The trial will evaluate the effectiveness of two methods of weight loss in the treatment of IIH: bariatric surgery vs. dietetic intervention. The primary outcome will be change in intracranial pressure between baseline and 12 months.                                                                                                                                                                                                                                                                                                                                                                                                                                                                                                |
| Main inclusion criteria                                                                                                                                                                                                                                                                                                                                            | <ul style="list-style-type: none"> <li>• Female IIH patients aged between 18 and 55 years, diagnosed according to the modified Dandy criteria who have active disease (papilloedema in at least one eye, significantly raised ICP &gt; 25cmCSF) of over 2 months duration and normal brain imaging (magnetic resonance imaging and venography as noted at diagnosis).</li> <li>• Body mass index (BMI) &gt;35kg/m<sup>2</sup>.</li> <li>• Tried other appropriate non-surgical treatments to lose weight but have not been able to achieve or maintain adequate, clinically beneficial weight loss for at least 6 months.</li> <li>• Able to give informed consent.</li> </ul>                                                           |
| Main exclusion criteria                                                                                                                                                                                                                                                                                                                                            | <ul style="list-style-type: none"> <li>• Age less than 18 or older than 55 years.</li> <li>• Pregnant.</li> <li>• Significant co-morbidity, Cushing's syndrome, Addison's disease or the use of oral or injected steroid therapy.</li> <li>• Undergone optic nerve sheath fenestration.</li> <li>• Definite indication for or contraindication against surgery or dieting.</li> <li>• Have a specific medical or psychiatric contraindication for surgery, including drug misuse, eating disorder or major depression (suicidal ideation, drug overdose or psychological admission in last 12 months).</li> <li>• Previous bariatric surgery.</li> <li>• Inability to give informed consent e.g. due to cognitive impairment.</li> </ul> |
| LAY SUMMARY                                                                                                                                                                                                                                                                                                                                                        |                                                                                                                                                                                                                                                                                                                                                                                                                                                                                                                                                                                                                                                                                                                                          |
| Idiopathic intracranial hypertension (IIH) is a condition with an unknown cause or causes. The condition is associated with raised pressure in the brain and can cause disabling daily headaches and visual loss, which can be permanent. The raised brain pressure squashes the nerves supplying the eye (also known as papilloedema) and this can affect vision. |                                                                                                                                                                                                                                                                                                                                                                                                                                                                                                                                                                                                                                                                                                                                          |
| Over 90% of patients with IIH are overweight and weight loss is the most effective treatment. Other                                                                                                                                                                                                                                                                |                                                                                                                                                                                                                                                                                                                                                                                                                                                                                                                                                                                                                                                                                                                                          |

treatments for IIH have very little current evidence to support their use. This trial aims to compare two methods of weight loss, bariatric surgery and the most effective dietary weight loss programme commonly available, Weight Watchers, to see which offers the most effective long-term treatment for IIH. Bariatric surgery is recommended by the NICE clinical guidelines for patients with a Body Mass Index (BMI) of over 40 kg/m<sup>2</sup>, or over 35 kg/m<sup>2</sup> with a co-morbidity. Women suffering from IIH have a BMI on average around 38 kg/m<sup>2</sup> and IIH is not recognised as a co-morbidity for bariatric surgery.

This trial will recruit 64 women from UK NHS Trusts. They will be randomised and 32 participants will be allocated to the dietary weight loss arm, and enrolled in their local Weight Watchers group. 32 participants will be allocated to the bariatric surgery arm, and referred to their local bariatric surgery pathway to receive gastric banding, gastric bypass, or sleeve gastrectomy according to patient and surgeon preference. Both groups of participants will be allocated to a treatment arm which is proven to bring about weight loss.

A control group of at least 20 women with similar characteristics, but who do not have IIH will provide a pre-intervention comparison. A second group of control participants without IIH but undergoing bariatric surgery will donate fat and skin samples to optimise the laboratory experiments that will be carried out on samples taken from the bariatric surgery arm participants. At least 5 volunteers will also be recruited to undergo 2 MRI test scans to validate the MRI sequences being used in the trial. These groups will not participate any further in the trial.

Participants with IIH entered into the randomised trial will then be followed up for five years, with the most important measurement being their brain pressure after one year of being in the trial. The main risk is to patients in the bariatric surgery arm: weight loss surgery, although safe, is a major operation, and careful follow up is required. Laparoscopic gastric banding has a mortality rate of less than 0.1%, and both laparoscopic gastric bypass and laparoscopic sleeve gastrectomy have a mortality rate of less than 0.2%.

Participants will need to provide informed consent; those who are unable to do so will not be enrolled in the trial.

Participants with IIH and the 20 obese controls will also be asked to give samples of urine, blood, and cerebrospinal fluid. Some participants, including the obese controls, will also be asked to participate in sub-studies to look at the relationship between IIH and other illnesses connected with obesity, from which they may suffer. These samples and sub-studies may provide valuable insight into the causes of IIH and future treatment options.

349

350

351 **TRIAL SCHEMA**

352 **Figure 1 – For trial participants with IIH**

353 NB: Typical surgery pathway as followed at Birmingham Heartlands Hospital (BHH)

354  
355  
356  
357  
358  
359  
360  
361  
362  
363  
364  
365  
366  
367  
368  
369  
370  
371  
372  
373  
374  
375  
376  
377  
378  
379  
380  
381  
382  
383  
384  
385  
386  
387  
388  
389  
390  
391  
392  
393  
394  
395  
396  
397  
398  
399  
400  
401  
402  
403

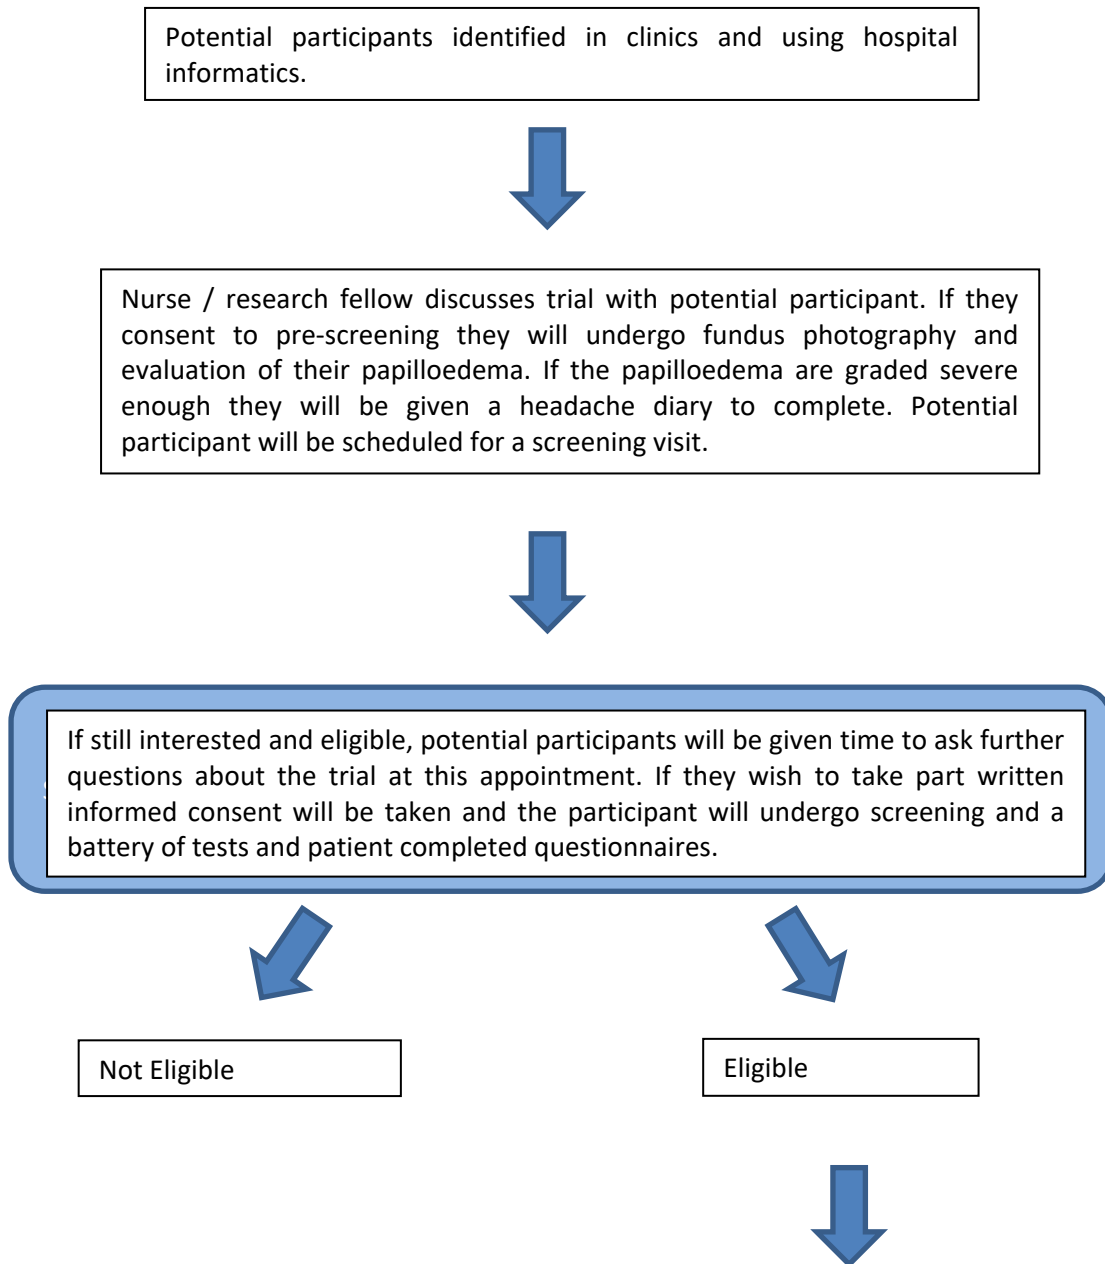

404  
405  
406  
407  
408  
409  
410  
411  
412  
413  
414  
415  
416  
417  
418  
419  
420  
421  
422  
423  
424  
425  
426  
427  
428  
429  
430  
431  
432  
433  
434  
435  
436  
437  
438  
439  
440  
441  
442  
443  
444  
445  
446  
447  
448  
449  
450  
451  
452  
453  
454

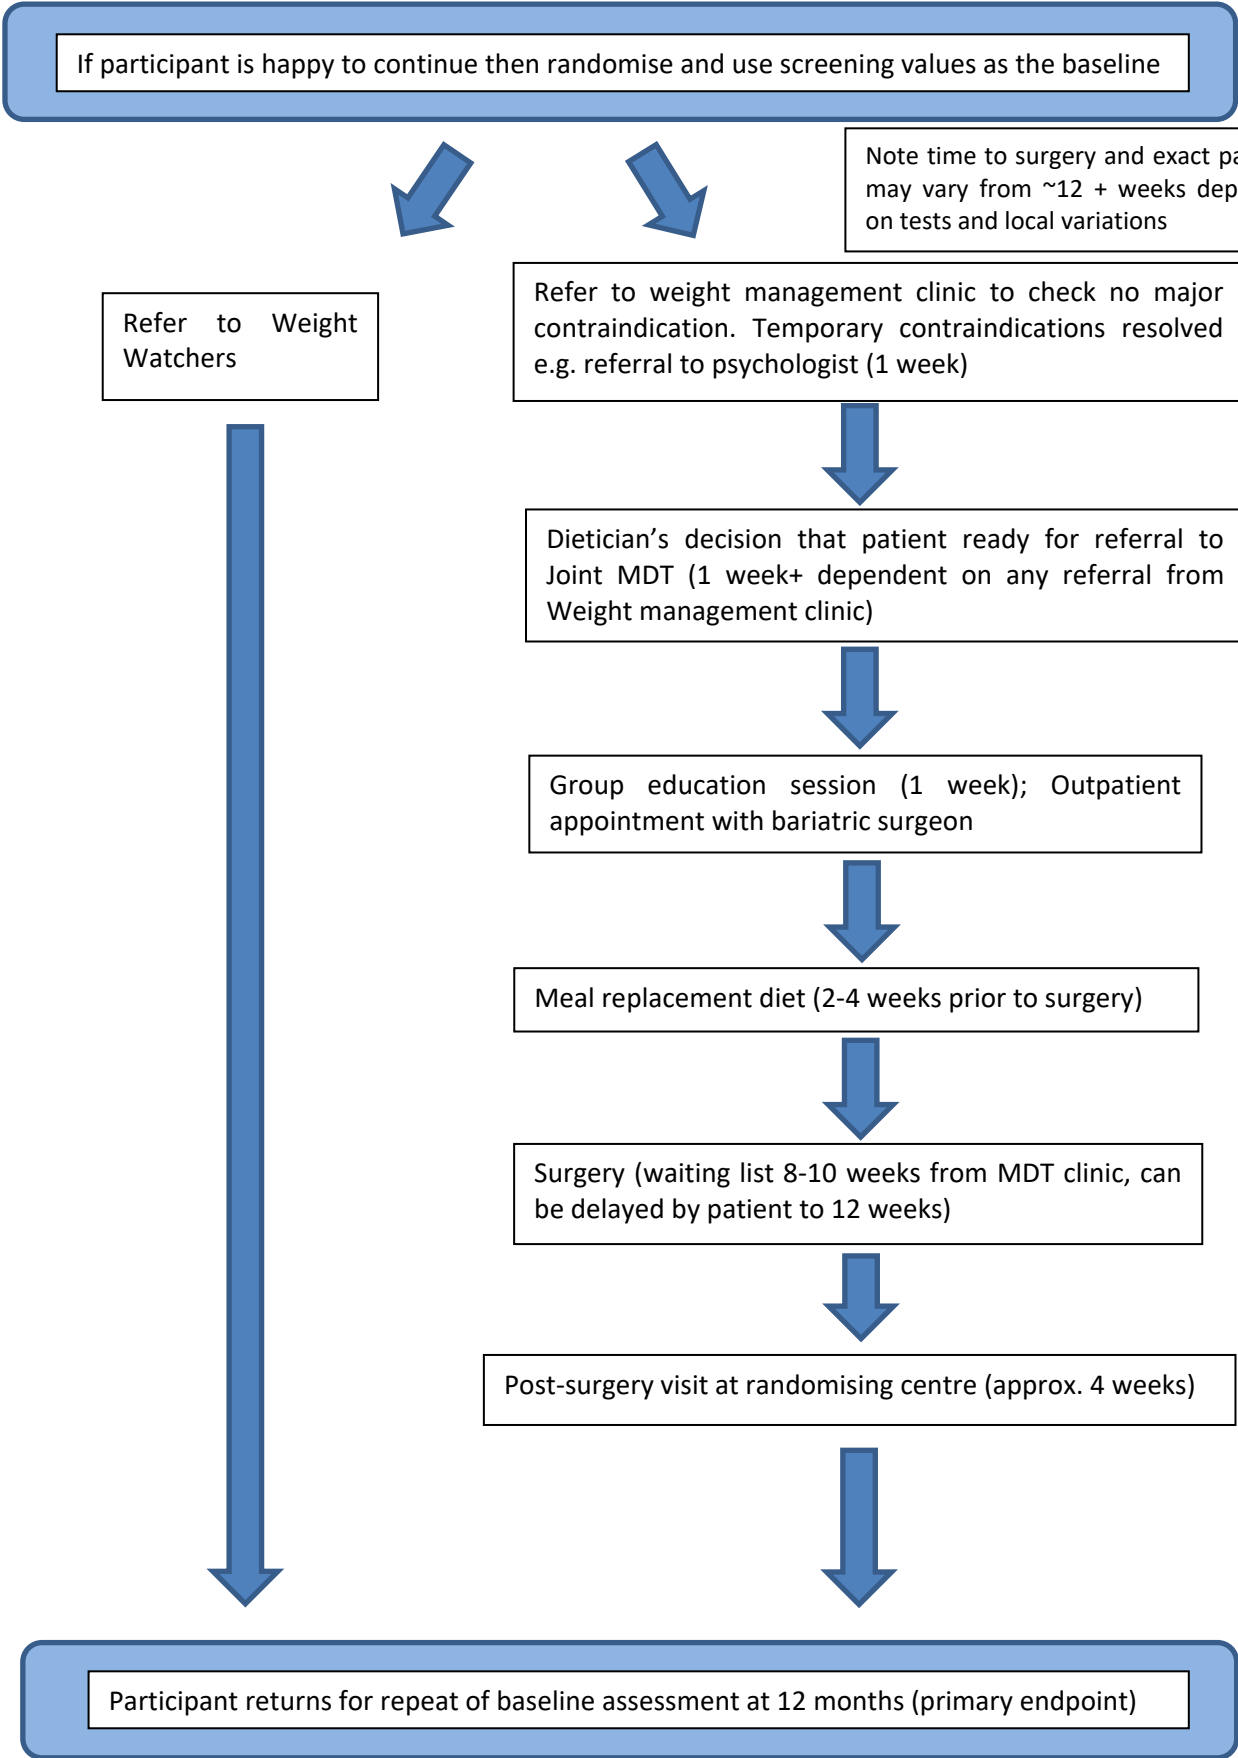

455  
456  
457  
458  
459  
460  
461  
462  
463  
464  
465  
466  
467  
468  
469  
470  
471  
472  
473  
474  
475  
476  
477  
478  
479  
480  
481  
482  
483  
484  
485  
486  
487  
488  
489  
490  
491  
492  
493  
494  
495  
496  
497  
498  
499  
500  
501  
502  
503  
504  
505  
506  
507

## 1. BACKGROUND

### 1.1. Idiopathic Intracranial Hypertension (IIH)

IIH, also known as benign intracranial hypertension or pseudotumour cerebri, is a condition of unknown aetiology characterised by elevated intracranial pressure (ICP) and papilloedema. IIH is a condition found primarily in obese women (90%), causing disabling daily headaches and visual loss, which is severe and permanent in up to 25% of cases [1]. Effective treatments are lacking and range from unproven medical therapy to surgical procedures which offer symptomatic relief and prevent blindness. Amongst the obese female population, the incidence of IIH is 20 per 100,000. Worldwide, the number of obese individuals has doubled since 1980 with 22.7% of the UK population being characterised as obese (body mass index (BMI) >30kg/m<sup>2</sup>) [2] and in line with the global epidemic of obesity, the prevalence of IIH is expected to rise and consequently contribute significant morbidity to the young female obese population.

### 1.2. Current therapy for IIH

The 2005 Cochrane review concluded that there was insufficient evidence to determine which treatments were potentially beneficial and which were harmful in IIH [3]; hence there are no specific guidelines regarding the treatment of IIH.

Medical therapy, typically carbonic anhydrase inhibitors, has been used with the aim of lowering ICP, although evidence of efficacy is lacking. Our pilot study of 50 patients comparing the carbonic anhydrase inhibitor acetazolamide to control showed improvement in both arms, however this trial was not powered to determine a difference between the two treatment arms [4]. Topiramate, a carbonic anhydrase inhibitor with weight loss properties, has been evaluated in IIH and was found to induce weight loss, but this trial is difficult to interpret since no therapeutic benefit on IIH was noted above the control cohort treated with acetazolamide (visual field grades improved from baseline in both groups, but there was no statistically significant difference between groups) [5].

In cases of deteriorating vision, surgical techniques such as cerebrospinal fluid (CSF) diversion (shunting) or optic nerve sheath fenestration can be used to prevent blindness. The incidence of CSF shunting procedures to lower ICP is rising rapidly in the USA in line with the growing obesity figures [6]. Shunting itself is a far from satisfactory treatment of IIH. Our audit at University Hospitals Birmingham NHS Foundation Trust recorded 127 shunt insertions for patients with IIH between 1998 and 2008 resulting in short-term significant visual improvement [7]. However, 79% of patients continued to suffer with headaches at 2 years, with 28% having iatrogenic low pressure headaches. Shunt revision occurred in 51%, with 30% requiring multiple revisions. Our data and that of others confirm the significant morbidity and low mortality from CSF shunting [8]. Patients waiting for a shunt and suffering disabling headaches with very high pressures can also be offered repeated lumbar punctures (LP) to lower ICP and thereby offer symptomatic relief.

### 1.3. Weight loss

Weight loss has been suggested as a treatment strategy in IIH, but the only prospective evidence of efficacy came from an uncontrolled study of 9 patients on a low calorie rice diet, who were subjectively observed to improve [9]. We have published a seminal prospective study of 25 participants which demonstrated that use of a very low calorie diet leading to weight loss and significantly reduced BMI (loss of 15.3% ± 7.0% of body weight) significantly lowered ICP (-8.0 ± 4.2 cmCSF, p<0.001) and significantly improved papilloedema, vision and headache symptoms [10].

There are no published systematic reviews or meta-analyses of weight modification or bariatric surgery in IIH, although an ever increasing number of case series and case reports (62 documented cases reviewed as of 2011) describe the beneficial effects of bariatric surgery in IIH [11].



508  
509  
510  
511  
512  
513  
514  
515  
516  
517  
518  
519  
520  
521  
522  
523  
524  
525  
  
526  
527  
528  
529  
530  
531  
532  
533  
534  
535  
536  
537  
538  
539  
540  
541  
542  
543  
544  
545  
546  
547  
548  
549  
550  
551  
552  
553  
554  
555  
556  
557

#### **1.4. Bariatric surgery for IIH**

Bariatric surgery has many advantages as a potential treatment for IIH:

- 1) Weight loss is greater than that observed with other weight reducing approaches [12]. Patients typically lose 30% of body weight by one year [13];
- 2) Weight loss is sustained [12];
- 3) Other obesity related co-morbidities such as diabetes are improved [14-16];
- 4) Life expectancy is significantly increased, particularly in young patients as they have the lowest surgical risk and longest life expectancy to benefit from the resulting weight loss [17];
- 5) There are a number of bariatric surgical procedures which can either reduce the gastric capacity (e.g. gastric banding [LAGB]) or reduce intestinal absorption as well as reducing gastric capacity (e.g. Roux-en-Y gastric bypass [RYGBP]) enabling the surgery to be tailored to the individual patient's needs;
- 6) Bariatric surgery is a cost-effective intervention compared to non-surgical interventions to manage obesity, even in those with mild obesity (BMI >30 kg/m<sup>2</sup>) [18];
- 7) Bariatric surgery appears to have low associated morbidity and mortality: Hutter et al show 30 day mortality rates of 0.05% for LAGB, 0.11% for the newer laparoscopic sleeve gastrectomy (LSG) procedure, and 0.14% for RYGB [19]. RYGBP and LSG carry the highest risks, but patients undergoing these procedures typically have the highest preoperative morbidity and BMI [19, 20].

The National Institute for Health and Care Excellence (NICE) recommends bariatric surgery for the treatment of morbid obesity (BMI at least 40 kg/m<sup>2</sup>) or in people with a BMI of over 35 kg/m<sup>2</sup> in conjunction with other significant disease that may be improved if they lose weight [21].

#### **1.5. The choice of questions to be asked**

Weight loss, achieved through intensive dieting, is an effective therapeutic strategy in IIH. However long-term maintenance of weight loss is notoriously poor, which leads to the recurrence of symptoms: patients in the IIH weight loss study were noted to regain weight and consequently their symptoms and signs of IIH returned, a documented phenomenon in the condition [22]. Despite the relapse in IIH following weight gain, our study provides evidence of the efficacy of therapeutic weight loss. Consequently, sustainable approaches to weight loss in IIH are likely to offer patients an effective, potentially curative treatment.

##### **1.5.1 Rationale**

Long-term maintenance of weight loss is difficult irrespective of the dietary regime followed [23]. Obesity pharmacological therapies including orlistat and high dose liraglutide reduce weight by an average of 2.89kg and 7.6kg respectively [24, 25]. These data suggest that these drugs are unlikely to achieve sufficient weight loss to significantly modify IIH.

Bariatric surgery has been shown to be a sustainable approach to weight loss [26, 27], and so may offer long-term treatment of IIH. However, very little research and no randomised controlled trials have addressed this question.

Bariatric surgery is an invasive approach to weight reduction and a significant move away from current treatment for IIH. To impact current clinical practice, we feel that bariatric surgery would need to be compared to the best alternative weight loss regime (rather than just current practice). The comparator arm of the study will therefore be a dietary weight loss programme using the internationally recognised Weight Watchers diet.

Weight Watchers is a commercial dietary weight loss programme. This well recognised brand has a large geographical spread and over two million members in the UK. The programme contains both dietary and lifestyle modification advice, and each meeting is conducted according to the usual Weight Watchers guidelines led by a group leader trained by Weight Watchers. Weight Watchers represents the most

558 effective widely available dietary regime, achieving superior weight loss, attendance and cost effectiveness  
559 compared to other commercially available or primary care led weight reduction programmes [28].  
560

561 Participants in the IIH:WT trial will therefore be randomised between referral to their local bariatric surgery  
562 pathway or a dietary weight loss programme, which will be their local Weight Watchers group for 12  
563 months.  
564

### 565 **1.5.2 Risks and benefits**

566 Participants randomised to the bariatric surgery arm will be referred to the bariatric surgery pathway and,  
567 if judged suitable according to the bariatric surgery clinic's screening processes, will undergo LAGB, RYGBP,  
568 or LSG. The decision of which surgery to undergo will be made between the surgeon and the participant  
569 based upon the participant's health circumstances and preference.  
570

571 As shown above in 1.4, bariatric surgery is a safe procedure. RYGBP and LSG have a higher mortality rate  
572 than LAGB, but are often performed in a higher risk population. Bariatric surgery is particularly safe in our  
573 patient population who will typically be young and not morbidly obese (with a mean BMI of 38 g/m<sup>2</sup> [10]),  
574 and typically without other co-morbidities of obesity – so their surgical risk is much lower than a patient  
575 with morbid obesity (BMI 40-60 kg/m<sup>2</sup>) and obesity co-morbidities such as heart disease.  
576

577 Hutter et al. give a mean reduction in BMI of 7.05 m/kg<sup>2</sup> for LAGB, 11.87 for LSG and 15.34 for RYGBP [19].  
578 These results are more than adequate for achieving the 15.3% ± 7.0% reduction in body weight shown to  
579 significantly reduce ICP (-8.0 ± 4.2 cmCSF, p<0.001), papilloedema and symptoms in patients with IIH [10].  
580

581 Participants randomised to the dietary weight loss programme arm of Weight Watchers will benefit from a  
582 programme which has the highest success rate of commercially available dietary weight loss programmes  
583 [28] and will gain an understanding of nutrition and portion sizes in an environment that offers the support  
584 and motivation necessary to lose weight. There are no known risks to taking part in the Weight Watchers  
585 programme [28-31].  
586

587 The benefits of both trial arms in our patient population will also be increased as they are relatively young  
588 and will have more years to enjoy the advantages of weight loss in terms of overall improved health and  
589 reduction in co-morbidities.  
590

591 The main risk to participants in this trial is in the surgical procedure as described above. The assessment  
592 and management of risk is detailed in the separate IIH:WT Risk Assessment document. An ongoing  
593 evaluation of risk will continue throughout the trial.  
594

### 595 **1.6. Objective**

596 We wish to assess if weight loss through bariatric surgery and / or dietary weight loss programme is an  
597 effective sustainable treatment for IIH, with sustained reduction of ICP, visual symptoms and headaches.  
598

### 599 **1.7. Exploratory objectives**

600 As part of the trial, there are also a number of exploratory objectives which will be assessed through  
601 various optional sub-studies. These will not be carried out at all sites:  
602

- 603 • Sleep apnoea observational cohort sub-study
- 604 • Metabolic syndrome sub-study
- 605 • Magnetic resonance imaging in IIH sub-study
- 606 • Cognitive function sub-study
- 607 • Matched obese control group
- 608 • Obese sample control group
- 609 • MRI test run sub-study

610 See sections 11 and 12 for further information on the sub-studies.  
611  
612

## 613 **2. TRIAL DESIGN**

### 614 **2.1. Design**

615 We will conduct a randomised controlled parallel arm trial where participants will be randomised in a 1:1  
616 ratio to an NHS bariatric surgery pathway or to a community based Weight Watchers dietary weight loss  
617 programme. Sixty-four participants (32 to each arm) will be randomised.  
618

619 The trial will necessarily be open label due to the nature of the intervention though assessors of visual  
620 outcomes will be masked to randomised treatment allocation. It will not be practical to blind the nurse or  
621 clinician undertaking the medical and visual function assessments. The primary outcome, ICP, is an  
622 objective measure.  
623

### 624 **2.2. Primary Aims**

625 The trial will evaluate the effectiveness of two methods of weight loss for the treatment of IIH: bariatric  
626 surgery versus a dietary weight loss programme. It will:

- 627
- 628 • Evaluate if weight loss achieved through bariatric surgery reduces ICP and consequently treats  
629 patients with IIH.
- 630 • Evaluate if bariatric surgery is more effective than a dietary weight loss programme in reducing ICP  
631 and consequently treating patients with IIH.
- 632 • Evaluate the long-term effectiveness of bariatric surgery versus a dietary weight loss programme in  
633 reducing ICP and consequently treating patients with IIH.

### 634 **2.3. Secondary Aims**

635 The trial will evaluate the clinical effectiveness, cost-effectiveness and participant-centred clinical outcome  
636 measures (e.g. quality of life) of bariatric surgery versus a dietary weight loss programme.  
637

### 638 **2.4. Setting**

639 Suitable patients will be identified at Neurology and Neuro-ophthalmology clinics in UK NHS Trusts as well  
640 as at Participant Identification Centres (PIC sites) as described in 4.2 below. Participants randomised to the  
641 bariatric surgery arm will be referred to the local bariatric surgery pathway; participants randomised to the  
642 dietary weight loss arm will be enrolled in their local Weight Watchers group.  
643

### 644 **2.5. Target population**

645 Women with BMI > 35 kg/m<sup>2</sup>, with active IIH (papilloedema [Frisén grade ≥ 1 in at least one eye] and ICP > 25  
646 cmCSF) of over 2 months' duration who have tried other appropriate non-surgical treatments to lose  
647 weight, but have not been able to maintain weight loss.  
648

### 649 **2.6. Treatment arms**

650 Intervention arm

- 651 • Participants randomised to the bariatric surgery arm of the trial will be referred to the local NHS  
652 bariatric surgery pathway.

653 Active control arm

- 654 • Participants randomised to the dietary weight loss arm will be given vouchers that exempt them  
655 from paying for consecutive and specified weeks of their local Weight Watchers. Attendance at the  
656 groups will be monitored through participant self-reporting.

657 **2.7. Primary Outcome Measure**

- 658
- ICP (as measured in cmCSF by LP) at 12 months

659 **2.8. Secondary Outcome Measures**

- 660
- ICP at 24 and 60 months
  - Reported IIH symptoms (presence or absence of tinnitus, visual loss, diplopia, visual obscurations and headache) at 12 months (and at 24 and 60 months)
  - Visual function in both eyes (measured by LogMAR chart to assess visual acuity, automated perimetry (Humphrey 24-2 central threshold) to measure the visual field mean deviation, a MARS chart to evaluate contrast sensitivity, and Ishihara charts to measure colour vision) at 12 months (and at 24 and 60 months)
  - Papilloedema in both eyes at 12 months (measured by masked assessment of fundus photography and by Optical Coherence Tomography scans (OCT)) (and at 24 and 60 months)
  - Headache associated disability using the headache impact test-6 score (HIT 6) and headache diary at 12 months (and at 24 and 60 months)
  - Anthropometric measures (e.g. waist, hip, fat mass, blood pressure) at 12 months (and at 24 and 60 months)
  - Quality of life (participant reported using the EQ-5D-5L, ICECAP-A questionnaire, SF-36 Version 1 questionnaire, Hospital Anxiety and Depression scale (HAD score) and Allodynia Symptom Checklist-12) at 12 months (and at 24 and 60 months)
  - Difference in number of referrals to CSF shunting procedures and optic nerve sheath fenestration between treatment arms at 12 months (and at 24 and 60 months)
  - Health economics including cost-effectiveness at 12, 24 and 60 months.

679

680 **3. ELIGIBILITY**681 **Inclusion criteria**

- 682
1. Female IIH patients aged between 18 and 55 years, diagnosed according to the updated modified  
683 Friedman Jacobsen criteria [32] who have active disease (papilloedema [Frisén grade  $\geq 1$  in at least one  
684 eye], significantly raised ICP  $>25\text{cmCSF}$ ) of over 2 months<sup>\*</sup> duration and no evidence of venous sinus  
685 thrombosis (magnetic resonance or CT imaging and venography as noted at diagnosis).
  - 686 2. BMI  $>35\text{kg/m}^2$ .
  - 687 3. Tried other appropriate non-surgical treatments to lose weight but have not been able to achieve or  
688 maintain adequate, clinically beneficial weight loss for at least 6 months.
  - 689 4. Able to give informed consent.

690 **Exclusion criteria**

- 691
1. Age less than 18 or older than 55 years.
  - 692 2. Pregnant<sup>†</sup>.
  - 693 3. Significant co-morbidity, Cushing's syndrome, Addison's disease or the use of oral or injected steroid  
694 therapy.
  - 695 4. Undergone optic nerve sheath fenestration.
  - 696 5. Definite indication for or contraindication against surgery or dieting.

---

\* A month is defined as 4 weeks.

<sup>†</sup> It is recommended by the bariatric surgery team overseeing the bariatric surgery pathway at BHH that patients do not become pregnant within a year of surgery.

- 697 6. Have a specific medical or psychiatric contraindication for surgery, including drug misuse, eating  
698 disorder or major depression (suicidal ideation, drug overdose or psychological admission in last 12  
699 months).
- 700 7. Previous bariatric surgery.
- 701 8. Inability to give informed consent e.g. due to cognitive impairment.
- 702

## 703 **4. CONSENT AND RANDOMISATION**

### 704 **4.1. Informed consent process**

705 The conduct of the trial will be in accordance with the principles of Good Clinical Practice (GCP) as captured  
706 in the UK Research Governance Framework (2005 2<sup>nd</sup> Edition; as amended). The participant's written  
707 informed consent to participate in the trial must be obtained before any procedures relating to the trial  
708 (including screening) are undertaken and after a full explanation has been given of the trial, the treatment  
709 options and the manner of treatment allocation.

710

711 Participant information sheets (PIS) and consent forms will be provided so that potential participants can  
712 find out more about the trial before deciding whether or not to participate.

713

### 714 **4.2. Identifying potential participants**

715 Research staff will identify potential participants in clinic or using informatics. Clinic lists will also be  
716 screened before clinics for basic eligibility criteria. These patients will then be approached during their clinic  
717 appointment to establish any interest in taking part in the IIH:WT trial. In some cases, potential participants  
718 may be posted an appropriately approved invitation letter and PIS (including summary sheet), and will then  
719 be followed up by telephone by the research team.

720

721 Additionally, potential participants will be identified and referred to trial sites from PIC sites. In these cases  
722 the patient details will be sent to the research team at the trial site who will then contact the potential  
723 participant. Participants will not be consented at PIC sites.

724

725 A hospital poster will be used in appropriate clinics e.g. Neuro-ophthalmology and Neurology. Hospital  
726 newsletters and social media may also be used for advertising purposes. Finally, the trial will be advertised  
727 on websites such as the IIH UK charity website with a printable consent form allowing the trial site research  
728 teams to contact potential participants' doctors for a referral and transfer of patient notes and details.

729

### 730 **4.3. Pre-screening**

731 Eligibility should be assessed and documented by a clinician or research nurse and then the process of  
732 obtaining written informed consent for pre-screening may be delegated as appropriate (to a suitably  
733 trained member of the local research team). This must be clearly documented on the IIH:WT Delegation  
734 and Signature Log in the site file.

735

736 Potential participants will be offered details of the trial and provided with a short written PIS explaining the  
737 pre-screening process (i.e. the current Research Ethics Committee [REC] approved version which should be  
738 on appropriately headed paper).

739

740 If they are interested, they will be asked to consent to a pre-screening process that will involve having their  
741 papilloedema graded. The treating neuro-ophthalmologist will grade the papilloedema clinically using  
742 Frisén grading (Appendix A). The papilloedema will be further recorded using fundus photography, which  
743 will be carried out at the pre-screening stage where practical (or at baseline if not practical at pre-  
744 screening) and then at the 12, 24 and 60 month visits (see 6.1.1 below). If the papilloedema according to  
745 the Frisén grading is  $\geq 1$  in at least one eye the potential participant will be eligible, and they will be given a  
746 provisional clinic appointment (baseline/screening visit) in at least a week's time (at least 7 days and no  
747 more than 30 days).

748

749 They will then be asked to complete a week long headache diary (which will be used as baseline  
750 information if they subsequently consent to join the trial) – this should be completed in the week before  
751 their clinic appointment.

752

753 It is felt that asking the potential participants to complete this headache data before consenting to join the  
754 full trial is appropriate as it spares the participant from further hospital visits and will be explained in the  
755 pre-screening PIS and included in the pre-screening consent.

756

757 It will be explained that there will be a clinic appointment (baseline/screening visit) which will include  
758 further screening and tests for taking part in the trial, and that if they are eligible and still want to take part  
759 they will be asked to provide informed consent to be entered into the full trial and then randomised to one  
760 of the treatment arms. It will also be explained that potential participants should not eat after midnight as  
761 fasting blood samples will be required.

762

763 Potential participants will have time between this pre-screening visit and the following screening/baseline  
764 visit (at least a week) to consider the trial and decide whether or not they wish to take part, and to discuss  
765 the trial with their family and friends if they would like to do so. If the potential participant has any  
766 questions or queries about the trial during this time they will have the opportunity to discuss the trial with  
767 the research staff, whose contact details will be provided on the PIS. It will be explained that if the potential  
768 participant takes part in the pre-screening tests but later decides not to take part in the full trial this will  
769 not affect their continuing medical care.

770

#### 771 **4.4. Screening/baseline Visit**

772 The screening/baseline visit (and subsequent 12, 24 and 60 month visits) will be held on a single day or split  
773 across more than one day dependent on participant preference and hospital logistics. At this clinic  
774 appointment, potential participants will be given plenty of time to discuss the trial further and to have any  
775 questions that they may have about the trial answered. The complex nature of the trial, the possibility of  
776 undergoing a surgical procedure, and the need to attend hospital for follow up appointments on 5  
777 occasions after the baseline visit will be carefully explained. The Investigator or designee will explain that  
778 trial entry is entirely voluntary. It will also be explained that the participant can withdraw at any time  
779 during the trial, without having to give a reason and that their decision will not affect the standard of care  
780 they receive.

781

782 At the end of the screening/baseline visit and before randomisation, confirmation of participant eligibility  
783 will be made by a medically qualified doctor.

784

#### 785 **4.5. Written informed consent**

786 If the potential participant is still willing to participate in the trial then the informed consent process will be  
787 conducted by the Investigator or a delegated clinician for entry into the full trial. This will be obtained  
788 before any further procedures or collection of data are undertaken once the potential participant is happy  
789 that all their questions have been addressed. It will include consent for all the testing that will be  
790 completed for screening and during the trial. The PIS will outline that if any of the test results on the  
791 screening day do not fulfil the inclusion and exclusion criteria, then individuals will be withdrawn from  
792 further screening investigations and from progressing into the trial. However, data and samples from the  
793 screening visit will be kept and may be used in sub-studies. Consent will also be taken to inform their GP by  
794 letter of their participation in the trial. If written informed consent is given, then the baseline/screening  
795 visit will follow the process for assessments as outlined in section 6.2 below.

796

797 If the potential participant is eligible after completing screening/baseline testing, then the participant will  
798 be randomised and the recorded data (as well as the headache diary completed in pre-screening) used as  
799 baseline values.

800

801 Any visual assessments which should be carried out at baseline will not be repeated at this visit if, as a  
802 routine part of clinical care, they have been carried out in the last 30 days. These previous test results will  
803 be used to spare the participant the trouble of undergoing these lengthy tests (45 minutes for the  
804 Humphrey Visual Field test) again; this will be acceptable as the visual field, for example, does not vary  
805 rapidly with time.

806  
807 At each visit the participant's willingness to continue in the trial will be ascertained and documented in the  
808 medical notes. Throughout the trial the participant will have the opportunity to ask questions about the  
809 trial. Any new information that may be relevant to the participant's continued participation will be  
810 provided. Where new information becomes available which may affect the participants' decision to  
811 continue, participants will be given time to consider and if happy to continue will be re-consented. Re-  
812 consent will be documented in the medical notes. The participant's right to withdraw from the trial will  
813 remain.

814

#### 815 **4.6. Randomisation**

816 Randomisation notepads will be provided to researchers and will be used to collate the necessary  
817 information prior to randomisation. Participants are entered and randomised into the trial by a telephone  
818 call (0800 953 0274) to the toll-free randomisation service at the University of Birmingham Clinical Trials  
819 Unit (BCTU). This secure central randomisation service is available Monday-Friday, 09:00-17:00 UK time,  
820 except for bank holidays and University of Birmingham closed days, and will ensure concealment of  
821 treatment allocation. The person randomising will need to provide answers to all of the questions on the  
822 randomisation notepad before a treatment allocation is given. Participants will be randomised in a 1:1 ratio  
823 between the two arms of the trial: dietary weight loss programme or bariatric surgery.

824

825 Randomisation will be provided by a computer generated allocation list at the BCTU. The randomisation  
826 will be stratified according to whether or not the participant is taking acetazolamide at entry.

827

828 After randomisation a confirmation of treatment allocation and trial number will be sent by BCTU to the  
829 research team.

830

831 Investigators will keep their own study file log which links patients with their trial number in the IIH:WT  
832 Participant Recruitment and Identification Log. The Investigator must maintain this document, which is not  
833 for submission to the Trials Office. The Investigator will also keep and maintain the IIH:WT Screening Log  
834 which will be kept in the Investigator Site File, and should be available to be sent to the Trials Office upon  
835 request. The IIH:WT Participant Recruitment and Identification Log and IIH:WT Participant Screening Log  
836 should be held in strict confidence.

837

#### 838 **4.7. Informing the participant's GP**

839 The participant's GP will be notified, with the participant's consent; a specimen "Letter to GP" is supplied.

840

#### 841 **4.8. Ineligible patients**

842 Reasons for non-participation will be recorded if the information is volunteered at any stage of the pre-  
843 screening, screening, or informed consent process.

844

#### 845 **4.9. Optional consent to collection of NHS routine clinical datasets**

846 This trial will include optional consent to allow linkage to patient data available in NHS routine clinical  
847 datasets, including primary care data (e.g. Clinical Practice Research Datalink, The Health Improvement  
848 Network, QResearch), secondary care data (Hospital Episode Statistics) and mortality data from the Office  
849 of National Statistics through NHS Digital and other central UK NHS bodies. The participant will consent to  
850 the trial team sending their name, address, date of birth and NHS number to the relevant national registry  
851 and then for the national registry to link this to their data and send the information back to the trial team.  
852 The consent will also allow access to other new central UK NHS databases that will appear in the future.

853 This will allow us to extend the follow-up of patients in the trial and collect long-term outcome and health  
854 resource usage data without needing further contact with the trial participants.  
855

856 This is being introduced after the recruitment of all main trial participants. Rather than increase the burden  
857 on participants by making a hospital visit for this consent obligatory, sites will have the option to allow the  
858 participant to complete this additional consent by post. In this case the PIS addendum will be posted by the  
859 site with a prepaid return envelope and the participant contacted by telephone to ensure that they have  
860 the same opportunity to discuss taking part that they would have during a hospital visit.  
861  
862

## 863 **5. TREATMENT ALLOCATIONS**

### 864 **5.1. Trial intervention: bariatric surgery**

865 Participants randomised to the bariatric surgery arm of the trial will be referred to an NHS surgical  
866 pathway. As an illustration of a typical pathway, the pathway followed at BHH is given below:  
867

868 Initially they will be seen in the weight management clinic for medical and psychological assessment for  
869 bariatric surgery. This assessment period will last as long as the weight management team find appropriate.  
870 Once the weight management team are satisfied that the participant is suitable, they will be discussed in  
871 the joint multidisciplinary team meeting prior to attending a group session for education regarding bariatric  
872 surgery. The participant will then have an outpatient appointment with the Consultant Bariatric Surgeon  
873 and be given a date for surgery. They will be given up to 12 weeks for further consideration of the  
874 procedure if they require it. Immediately prior to the operation, participants will undergo a 2-4 week  
875 conditioning meal replacement diet (to shrink the liver, thereby increasing the safety of the laparoscopic  
876 procedure). This meal replacement diet will not be provided as part of the trial: it is a normal part of the  
877 surgical pathway, replacing participants' normal food during the diet, and a particular choice is difficult to  
878 enforce or supply due to patient preference and dietary requirements. Participants will choose and  
879 instigate this diet after consultation with the bariatric team. Post-surgery, participants will undergo (8, in  
880 the case of LAGB) follow up visits over 2 years as part of the standard surgical follow up. They will then  
881 remain indefinitely in touch with the bariatric unit should they need future advice or follow-up. It is  
882 envisioned that the standard patient pathway will take approximately 4 months from randomisation to  
883 surgery, but in exceptional cases at the decision of the bariatric team this may be longer.  
884

885 In the rare cases where the laparoscopic procedure has to be converted to open surgery the participant will  
886 still be included in the trial and followed up normally.  
887

888 In all cases, the choice of operation will be decided between participant and surgeon, and standard NHS  
889 follow up as required will be included in the treatment.  
890

### 891 **5.2. Trial intervention: dietary weight loss programme**

892 Participants randomised to the dietary weight loss programme arm will be given vouchers that exempt  
893 them from paying for 12 months of their local Weight Watchers meetings. Vouchers will be given in batches  
894 every 3 months. These will allow access to 12 sessions in the weekly meetings and to Weight Watchers  
895 online and mobile tools.  
896

### 897 **5.3. Compliance monitoring**

898 Data on compliance in the bariatric surgery arm will be collected directly from the bariatric surgery team  
899 overseeing the surgery pathway. Compliance in this arm will be considered as undergoing the bariatric  
900 surgery. Reasons for non-compliance will be recorded.  
901

902 Data on attendance to Weight Watchers for participants in the dietary weight loss programme arm will be  
903 self-reported.  
904



905

**5.4. Concomitant therapy**

906

907

908

909

910

911

912

913

914

**5.5. Excluded medications or interactions**

915

916

917

918

919

920

921

922

923

924

925

926

927

928

929

**5.6. Withdrawal of treatment or protocol violation**

930

931

932

933

934

935

936

937

938

939

940

941

942

**6. FOLLOW-UP AND ASSESSMENTS**

943

**6.1. Format of assessment visits**

944

945

946

947

948

**6.2. Screening/baseline visit**

949

950

951

952

953

954

955

956 To ensure the participant is eligible, the pregnancy test and LP (and related meal stimulation and post meal  
 957 blood samples) must be done on the day of randomisation if the screening/baseline visit is split.  
 958

- 959 • **Visual measurements:** Measurements to be undertaken are the LogMAR (log of the minimum  
 960 angle of resolution) chart to assess visual acuity, automated perimetry to measure the visual field  
 961 mean deviation, an evaluation of contrast sensitivity using a MARS chart, and an Ishihara book to  
 962 assess colour vision. The pupils will be dilated using 1% tropicamide (as is routinely done at clinic  
 963 visits) and papilloedema will then be measured using spectral OCT.  
 964

965 Papilloedema will be further graded centrally following fundus photographs. These will be  
 966 compared after all participants have reached the primary endpoint by two neuro-ophthalmologists  
 967 blinded to trial treatment arm. The assessors will score the paired papilloedema images as  
 968 better/same/worse as per the methodology described in a previous study [33]. They will also assign  
 969 a Frisén score to the images.  
 970

971 If any of the visual assessments which are part of routine clinical care have been carried out within  
 972 the last 30 days at the participant’s outpatient clinic appointment they will not be repeated and the  
 973 last recorded values will be used as baseline data. The fundus photography will, for the baseline  
 974 assessments, be done at the pre-screening stage where practical to lessen the burden on  
 975 participants on the main assessment day.  
 976

977 **Figure 2: Baseline visit**

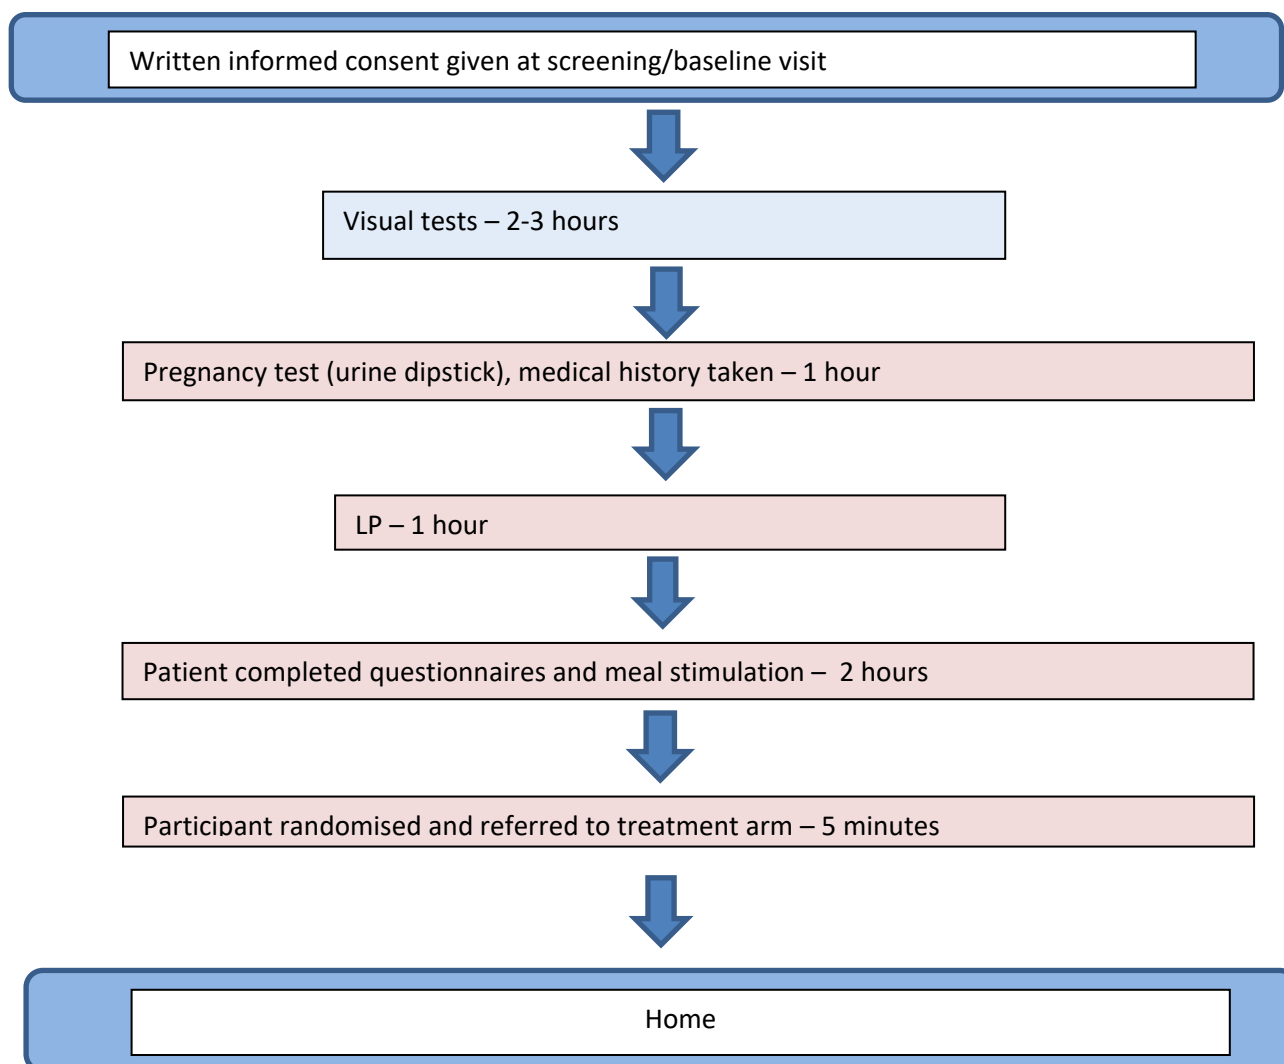

1006  
1007  
1008  
1009  
1010  
1011  
1012  
1013  
1014  
1015  
1016  
1017  
1018  
1019  
1020  
1021  
1022  
1023  
1024  
1025  
1026  
1027  
1028  
1029  
1030  
1031  
1032  
1033  
1034  
1035  
1036  
1037  
1038  
1039  
1040  
1041  
1042  
1043  
1044  
1045  
1046  
1047  
1048  
1049  
1050  
1051

- **Pregnancy Test:** A urine pregnancy test will be done at the screening/baseline visit.
- **Clinical Data:** This visit will include recording of demographic data, and current medication (acetazolimide, topiramate, hormonal contraception, diuretics, anti-hypertensives and headache preventatives).
- **Clinical Measurements:** Blood pressure, waist and hip measures and ratio, height and weight (footwear removed) and body composition using Tanita scales.
  - Height will be measured to the nearest 0.1 cm with a rigid stadiometer
  - Body weight will be measured in light indoor clothing to the nearest 0.1 kg
  - Waist circumference will be recorded whilst the participant is supine to the nearest 0.1 cm at the mid-point between the lower costal margin and the level of the anterior superior iliac crest
  - Hip circumference will be recorded to the nearest 0.1cm, from the widest point of the hips and the maximum protrusion of the gluteal muscles.
  - Brachial blood pressure will be measured as recommended by the British Hypertension Society ([http://www.bhsoc.org/how\\_to\\_measure\\_blood\\_pressure.stm](http://www.bhsoc.org/how_to_measure_blood_pressure.stm)) three times in the sitting position using standardised blood pressure monitors. The average of the second and third blood pressure readings will be recorded.  
The STOP-Bang screening tool [34, 35] will also be used to assess risk of sleep apnoea.
- **IIH Symptoms:** The presence or absence of symptoms attributed to IIH (and not from pre-existing conditions) will be formally recorded (pulsatile tinnitus, visual loss, diplopia (excluding that occurring from a longstanding squint), visual obscurations, and headache).

**Headache:** Participants will complete a daily headache diary in the week before the baseline/screening visit (or retrospectively if not possible), which will record severity, duration and use of analgesia. Headache phenotype (according to criteria from the International Headache Society) will be assessed. Headache associated disability will be evaluated using the Headache Impact Test-6 score (HIT-6). Change in the headache severity following LP will also be evaluated using a pain scale (0-10). The participant will be asked to rate their headache severity immediately before the LP, and for the week following the LP (Post-LP Headache diary).
- **Venesection:** The participant will undergo fasted blood sampling for analysis as described in section 6.3 below. After the fasted blood samples they will take two standard fortisips (240mls) as a meal stimulation. An LP will be performed at least 30 minutes after the meal stimulation and a timed series of blood samples will be collected at 15, 30, 60, 90 and 120 minutes following the fortisips.
- **Lumbar Puncture (LP):** To avoid the LP affecting the visual measures it will be performed after the visual tests have been completed. ICP will be recorded in cmCSF. Image guidance may be used if necessary. Only participants with an LP pressure greater than 25cmCSF will be recruited. Both opening and closing ICP will be recorded. 8mls of CSF will be collected and stored for future biomarker analysis.
- **Patient rated outcome measures** will be completed whilst the participant is resting after the LP; this will reduce the time the participant is required in clinic (see section 6.8 below).

1052  
1053  
1054  
1055  
1056  
1057  
1058  
1059  
1060  
1061  
1062  
1063  
1064  
1065  
1066  
1067  
1068  
1069  
1070  
1071  
1072  
1073  
1074  
1075  
1076  
1077  
1078  
1079  
1080  
1081  
1082  
1083  
1084  
1085  
1086  
1087  
1088  
1089  
1090  
1091  
1092  
1093  
1094  
1095  
1096  
1097  
1098  
1099  
1100  
1101  
1102  
1103

If the participant is eligible for the trial following screening and is recruited and randomised into the trial, the data collected at the pre-screening and screening visits will be used for the baseline data.

### **6.3. Follow up visits**

The 3 and 6 month follow up assessments will monitor clinical measurements as in 6.2 above (see Table 1).

The 12, 24 and 60 month visits will follow a similar process to the baseline visit (see Figure 3 and Table 1), except that the pregnancy test will not be repeated. Visits will take place within a window of 1 month of the time point where possible.

### **6.4. Post-surgery visits**

Those participants randomised to surgery will be invited to attend an assessment after their operation (visit window of 1-2 weeks post-op where possible). This is to measure gut neuropeptides (GLP-1) and investigate their role in the disease. At this visit the meal stimulation will be repeated with accompanying LP and pre- and 15, 30, 60, 90 and 120 minutes post-meal stimulation blood sampling. The Post-LP Headache diary will also be completed.

### **6.5. Withdrawal**

Informed consent is defined as the process of learning the key facts about a clinical trial before deciding whether or not to participate. It is a continuous and dynamic process and participants should be asked about their ongoing willingness to continue participation.

Participants should be aware at the beginning that they can freely withdraw (discontinue participation) from the trial (or part of) at any time.

#### **Types of withdrawal as defined are:**

- The participant would like to withdraw from trial treatment, but is willing to be followed up in accordance with the schedule of assessments (i.e. the participant has agreed that data can be collected and used in the trial analysis).
- The participant would like to withdraw from trial treatment and does not wish to attend trial visits in accordance with the schedule of assessments but is willing to be followed up at standard clinic visits (i.e. the participant has agreed that data can be collected at standard clinic visits and used in the trial analysis, including data collected as part of long-term outcomes).
- The participant would like to withdraw from trial treatment and is not willing to be followed up in any way for the purposes of the trial and for no further data to be collected (i.e. only data collected prior to the withdrawal can be used in the trial analysis).

The details of withdrawal (date, reason where given and type of withdrawal) should be clearly documented in the source data.

### **6.6. Timing of assessments**

Table 1 on page 30 summarises the outcome measures and assessments over the course of the trial.

### **6.7. Participant completed questionnaires**

Participant completed questionnaires (EQ-5D-5L, SF-36 Version 1, ICECAP, Hospital Anxiety and Depression (HADS) score, Resource usage, Headache Impact Test-6, and Allodynia Symptom Checklist-12) will be completed by participants during their clinic visits at baseline and again at 12, 24 and 60 months. The Epworth Sleepiness Scale and Berlin Questionnaire will also be completed at baseline and 12 months to assess risk of sleep apnoea. A 7 day headache diary will be given to participants to complete at home at least a week before their scheduled clinic appointments.

1104  
1105  
1106  
1107  
1108  
1109  
1110  
1111  
1112  
1113  
1114  
1115  
1116  
1117  
1118  
1119  
1120  
1121  
1122  
1123  
1124  
1125  
1126  
1127  
  
1128  
1129  
1130  
1131  
1132  
1133  
1134  
1135  
1136  
1137  
1138  
1139  
1140  
1141  
1142  
1143  
1144  
1145  
1146  
1147  
1148  
1149

## 6.8. Assessment methods

The CRFs will comprise the following forms:

- Visual Assessment Form: to be completed by the clinicians who will be carrying out the relevant standard clinical practice assessments or from their patient notes;
  - Clinician Form; Research Nurse Form: to be completed by the named individuals on the delegation log who will be carrying out the relevant assessments and taking the relevant samples;
  - Participant booklets including sleep questionnaires: comprising participant completed questionnaires as described above and to be completed by participants during their clinic visit;
  - Headache diary: this will be supplied to participants a week before their clinic visits are due and will include analgesic use (a similar diary will be use to track headache severity after lumbar puncture);
- SAE Form: this will be completed by the Principal Investigator (PI) or delegated member of the research team when required. Please see the Adverse Event Reporting section of this protocol for details.
- Pre-Surgery Form; Surgery Form; Post-Surgery Form and Subsequent Procedure Form: these will record the bariatric surgery pathway and will be completed by the named individuals on the delegation log at surgery sites.
  - Control “Light” form: there will be a specific CRF combining the assessments to be undergone by the subset of Matched Obese Control participants described in section 12.1.

1150

**Table 1: Outcome measures and assessments**

| Outcome               | Measure                                        | Pre-screening visit | Baseline | 3 months | 6 months | Post-op | (Primary endpoint) 12 months | 24 months | 60 months |
|-----------------------|------------------------------------------------|---------------------|----------|----------|----------|---------|------------------------------|-----------|-----------|
| Primary outcome       |                                                |                     |          |          |          |         |                              |           |           |
| Intracranial pressure | Lumbar puncture                                |                     | x        |          |          | x       | x                            | x         | x         |
| Secondary outcomes    |                                                |                     |          |          |          |         |                              |           |           |
| Eligibility           | Pregnancy test                                 |                     | x        |          |          |         |                              |           |           |
| Weight                | BMI                                            |                     | x        | x        | x        | x       | x                            | x         | x         |
|                       | Waist/hip ratio                                |                     | x        | x        | x        | x       | x                            | x         | x         |
|                       | Blood pressure                                 |                     | x        | x        | x        | x       | x                            | x         | x         |
|                       | Body composition using Tanita scales           |                     | x        | x        | x        | x       | x                            | x         | x         |
| Visual assessments    | Visual acuity and contrast sensitivity         |                     | x        |          |          |         | x                            | x         | x         |
|                       | Humphrey visual field (24-2)                   |                     | x        |          |          |         | x                            | x         | x         |
|                       | Ishihara colour assessment                     |                     | x        |          |          |         | x                            | x         | x         |
|                       | Optical coherence tomography                   |                     | x        |          |          |         | x                            | x         | x         |
|                       | Retinal photographs                            | x                   |          |          |          |         | x                            | x         | x         |
| Headache assessments  | Headache Impact Test 6                         | x                   |          |          |          |         | x                            | x         | x         |
|                       | Post-LP Headache diary                         |                     | x        |          |          | x       | x                            | x         | x         |
|                       | Headache diary                                 | x                   |          |          |          |         | x                            | x         | x         |
| Quality of Life       | EQ-5D-5L                                       |                     | x        |          |          |         | x                            | x         | x         |
|                       | ICECAP-A                                       |                     | x        |          |          |         | x                            | x         | x         |
|                       | SF-36 Version 1                                |                     | x        |          |          |         | x                            | x         | x         |
|                       | Hospital Anxiety and Depression (HAD) score    |                     | x        |          |          |         | x                            | x         | x         |
|                       | Allodynia Symptom Checklist-12                 |                     | x        |          |          |         | x                            | x         | x         |
| Health Economics      | Cost-effectiveness, utility and -benefit       |                     | x        |          |          |         | x                            | x         | x         |
| Biomarkers            | Blood                                          |                     | x        |          |          | x       | x                            | x         | x         |
|                       | CSF                                            |                     | x        |          |          | x       | x                            | x         | x         |
|                       | Meal stimulation                               |                     | x        |          |          | x       | x                            | x         | x         |
| Sleep apnoea          | Epworth Sleepiness Scale, Berlin questionnaire |                     | x        |          |          |         | x                            |           |           |
|                       | STOP-Bang                                      | x                   |          |          |          |         | x                            |           |           |
| SAE monitoring        | SAE forms                                      |                     | x        | x        | x        | x       | x                            | x         | x         |

1151

1152

1153

1154

1155 **6.9. Blood and CSF samples**

1156 Serum and cerebrospinal fluid samples will provide data on disease biomarkers at baseline, 12, 24 and 60  
1157 months.

1158  
1159 Venesection

1160 The participant will undergo fasted blood sampling for (identifying tube colours as used by UHB):

- 1161 • Fasting metabolic evaluation (for real time analysis):
  - 1162 – HbA1c – 1 purple tube of blood.
  - 1163 – Glucose and Lipids (Cholesterol, triglycerides, HDL) - 1 grey tube of blood, 1 yellow  
1164 tube of blood
- 1165 • PCOS bloods (for real time analysis):
  - 1166 – Testosterone – 1 yellow tube of blood
  - 1167 – SHBG, Androstendione, DHEAs, FSH, LH, Oestradiol, 17OHP [hydroxyprogesterone] -  
1168 1 red tube of blood
- 1169 • Exploratory analysis:
  - 1170 – Biomarker analysis including fasting insulin – 1 yellow tube of blood
  - 1171 – GLP-1 - 1 purple pre-prepared GLP-1 tube of blood (provided to the site and  
1172 containing a dipeptidyl peptidase-4 [DDP-4] inhibitor, frozen in lab and brought to  
1173 clinic in an ice bucket before the participant arrives) taken and kept on ice before  
1174 processing and storage.

1176 The participant will then undergo a meal stimulation test, taking two standard fortisips. Further samples of  
1177 blood will be taken approximately 15, 30, 60, 90, and 120 minutes after this test and collected in 5 purple  
1178 pre-prepared GLP-1 tubes as above.

1180 The samples and quantities of blood taken at the various visits are summarised in table 2 and 3 below:

1182 **Table 2: Blood samples and tubes (baseline, 12, 24 and 60 months)**

| Fasting metabolic evaluation              | PCOS                      | Exploratory analysis | Pre and Post meal samples |
|-------------------------------------------|---------------------------|----------------------|---------------------------|
| 1 purple tube, 1 grey tube, 1 yellow tube | 1 yellow tube, 1 red tube | 1 yellow tube        | 6 purple GLP-1 tubes      |

1184 **Table 3: Blood samples and quantities (baseline, 12, 24 and 60 months)**

| Yellow tubes (4mls) | Grey tubes (2mls) | Purple tubes (4mls) | Purple GLP-1 tubes (2mls) | Red tubes (6mls) | Volume collected in mls |
|---------------------|-------------------|---------------------|---------------------------|------------------|-------------------------|
| 3                   | 1                 | 1                   | 6                         | 1                | 36                      |

1185 **Lumbar puncture**

1186 The participant will undergo a lumbar puncture approximately 30 minutes after the meal stimulation test.

1188 1ml of CSF will be collected for microscopy +/- culture. Approximately 1ml will be collected into 3 tubes (6  
1189 drops in each) for glutamate, substance P and calcitonin gene related peptide (CGRP) analysis.  
1190 Approximately 8mls of CSF will be collected in a universal tube containing a DPP-4 inhibitor and kept on ice  
1191 before processing.

1194 **6.10. Processing and storage of samples**

1195 Full details of sample processing are described in the separate trial laboratory manual.

1196

1197 **Blood**

- 1198 • Fasting metabolic bloods: 1 purple tube and 1 grey tube will be processed by the hospital  
1199 laboratories.
- 1200 • PCOS bloods: 1 yellow tube and 1 red tube will be processed by the hospital laboratories.
- 1201 • Exploratory analysis and pre/post meal samples: 1 yellow tube and 6 purple GLP-1 tubes will be  
1202 processed according to the laboratory manual and the aliquots stored at -80°C, initially at the site  
1203 before transfer to UoB.

1204 **CSF**

- 1205 • Microscopy +/- culture: 1ml of sample will be processed by the hospital laboratories.
- 1206 • Approximately 1ml of sample (3 tubes of 6 drops each) will be transferred on dry ice to a -80°C  
1207 freezer before transfer to UoB for glutamate, substance P and CGRP analysis.
- 1208 • The remaining CSF will be processed according to the laboratory manual before storage at -80°C in  
1209 the hospital and subsequent transfer to UoB for biomarker analysis including GLP-1.

1210

1211 **7. ADVERSE EVENT REPORTING**

1212

1213 **FAX SAE forms to the IIH:WT Trial Office on:**1214 **0121 415 9135 or email [neuroscience@trials.bham.ac.uk](mailto:neuroscience@trials.bham.ac.uk)**

1215

1216 **7.1. Assessment of Safety**

1217 There are no novel medical devices or Investigational Medicinal Products (IMPs) used as part of this trial.

1218

1219 The main risks in the trial are the bariatric surgery, as mentioned in sections 1.4 and 1.5.2, and the LP  
1220 performed at baseline, post-operative visit, 12, 24 and 60 months.

1221

1222 Serious Adverse Events (SAEs) will be reported on a trial-specific SAE form and will follow the  
1223 procedure/timeframes outlined in this section of the protocol.

1224

1225 **7.2. Serious Adverse Events**

1226 SAEs are any untoward medical occurrence or effect that:

- 1227 • Results in death
- 1228 • Is life threatening
- 1229 • Requires hospitalisation or prolongation of an existing hospitalisation<sup>‡</sup>
- 1230 • Results in persistent or significant disability/incapacity or
- 1231 • Is a congenital anomaly or birth defect, or
- 1232 • Is otherwise considered medically significant by the Investigator.

1233

1234 SAEs may occur following randomisation or the screening tests required prior to randomisation. The SAE  
1235 reporting period will end 30 days after the participant's last trial assessment at 5 years (lumbar puncture).

1236

---

<sup>‡</sup> Hospitalisation is defined as an unplanned, overnight, formal inpatient admission, even if the hospitalisation is a precautionary measure for continued observation. Thus hospitalisation for protocol treatment, elective procedures (unless brought forward due to worsening symptoms), social reasons, or logistical reasons are not regarded as a SAE. Further examples of hospitalisation not constituting an SAE are provided in section 7.6.



1237  
1238  
1239  
1240  
1241  
1242  
1243  
1244  
1245  
1246  
1247  
1248  
1249  
1250  
1251  
1252  
1253  
1254  
1255  
1256  
1257  
1258  
1259  
1260  
1261  
1262  
1263  
1264  
1265  
1266  
1267  
1268  
1269  
1270  
1271  
1272  
1273  
1274  
1275  
1276

**7.3. SAE reporting procedures**

All SAEs will be recorded on a SAE form and in the participant medical notes. The SAE form must be reported to the trial office within 24 hours of the site being made aware of the event. When completing the form, the local PI (or delegate) will assess the severity and causality of the SAE. It is the PI’s responsibility to report SAEs to the trial office and to their Trust’s R&D department (if this reporting is required by the Trust).

Completed SAE forms should be faxed to the Neuroscience trial office on 0121 415 9135 or emailed to neuroscience@trials.bham.ac.uk. The Investigator at site will be required to respond to any related queries raised by the trial office as soon as possible.

On receipt the Trial Office will allocate each SAE a unique reference number which will be sent to the site as proof of receipt. If confirmation of receipt is not received within 1 working day please contact the Trial Office. The SAE reference number should be quoted on all correspondence and follow-up reports regarding the SAE and filed with the actual SAE in the Site File.

For SAE Forms completed by someone other than the PI, the PI will be required to countersign the original SAE Form to confirm agreement with the causality and severity assessments. The form should then be sent to the Trial Office and a copy kept in the Site File.

Following reporting of an SAE for a participant, the participants should be followed up until resolution or stabilisation of the event. Follow-up information should be provided using the SAE reference number provided by the BCTU trials team.

**7.4. Assessment of relatedness**

The following categories, as outlined in Table 4 below, will be used to define the relatedness (causality) of the SAE.

**Table 4: categorisation of relatedness**

| Category    | Definition                                                                                                                                                                                                         | Causality |
|-------------|--------------------------------------------------------------------------------------------------------------------------------------------------------------------------------------------------------------------|-----------|
| Definitely  | There is clear evidence to suggest a causal relationship, and other possible contributing factors can be ruled out.                                                                                                | Related   |
| Probably    | There is evidence to suggest a causal relationship, and the influence of other factors is unlikely.                                                                                                                |           |
| Possibly    | There is some evidence to suggest a causal relationship. However, the influence of other factors may have contributed to the event (e.g. the patient’s clinical condition, other concomitant events or medication) |           |
| Unlikely    | There is little evidence to suggest there is a causal relationship. There is another reasonable explanation for the event (e.g. the patient’s clinical condition, other concomitant events or medication).         | Unrelated |
| Not related | There is no evidence of any causal relationship.                                                                                                                                                                   |           |

On receipt of an SAE Form, the CI (or designee) will independently review the severity and causality of the SAE. An SAE judged by the PI or CI to have a reasonable causal relationship with the intervention will be regarded as a related SAE. The causality assessment given by the PI will not be downgraded by the CI. If the CI disagrees with the PI’s causality assessment, the opinion of both parties will be documented, and where the event requires further reporting, the opinion will be provided with the report.

**7.5. Assessment of expectedness**

Expectedness will be assessed by the CI (or designee) using this trial protocol as the reference document to assess SAEs. Table 5 overleaf gives definitions of expectedness with respect to SAEs.

1277 If the event is unexpected (i.e. is not defined in the protocol as an expected event) it will be classified as an  
 1278 unexpected SAE.

1279

1280 **Table 5: categorisation of expectedness**

| Category   | Definition                                                                                                                                 |
|------------|--------------------------------------------------------------------------------------------------------------------------------------------|
| Expected   | An adverse event that is consistent with known information about the trial related procedures or that is clearly defined in this protocol. |
| Unexpected | An adverse event that is <u>not</u> consistent with known information about the trial related procedures.                                  |

1281

1282 **7.6. Expected Adverse Events**

1283 Further to the definition of hospitalisation in section 7.2, an overnight hospital stay after surgery **will not be**  
 1284 **counted as an SAE** if required for routine care and is not due to a surgical complication. Reasons may  
 1285 include, for example, when a patient has a lengthy journey home, time of surgery (late in afternoon), lack  
 1286 of carer, when the patient has no telephone, Insulin treated diabetes, previously diagnosed sleep apnoea,  
 1287 ASA grade 3<sup>§</sup> or more, i.e. it is a clinical decision to stay overnight. An overnight hospital stay for any  
 1288 inflation of the gastric band, whether radiological or clinical, **will not be counted as an SAE** as it is a part of  
 1289 routine care.

1290

1291 **Expected Adverse Events include:**

- 1292 • Admission for deterioration of IIH;
- 1293 • Admission for post-LP headache.

1294 **Expected surgical Adverse Events include:**

- 1295 • Admission for regurgitation;
- 1296 • Admission for full band deflation or band slippage;
- 1297 • Admission for surgical revision;
- 1298 • Conversion from laparoscopic to open surgery.

1299 **7.7. Related and Unexpected SAEs**

1300 The CI will undertake urgent review of all SAEs and may request further information immediately from the  
 1301 clinical team at site. The CI will not overrule the severity or causality assessment given by the site  
 1302 Investigator but may add additional comment on these. The CI will assess the Expectedness of the SAE.  
 1303 Related and Unexpected SAEs will be notified to the REC using the standard National Research Ethics  
 1304 Service SAE report form for non-CTIMPs within 15 days.

1305

1306 **7.8. Annual Progress Reports**

1307 An annual progress report (with safety information included) will be submitted to the REC within 30 days of  
 1308 the anniversary date on which the favourable opinion was given, and annually until the trial is declared  
 1309 ended. Progress Reports will also be submitted to the Funder in accordance with their requirements.

1310

1311 **7.9. Reporting urgent safety measures to the REC**

1312 If any urgent safety measures are taken BCTU shall immediately, and in any event no later than 3 days from  
 1313 the date the measures are taken, give written notice to the REC of the measures taken and the  
 1314 circumstances giving rise to those measures.

1315

1316 **7.10. Data Monitoring Committee**

1317 The independent Data Monitoring Committee (DMC) will review all SAEs.

1318

---

<sup>§</sup> ASA Grade 3 is defined as a patient with severe systemic disease.  
 ISRCTN40152829

1319 **7.11. Notification of Serious Breaches of GCP and/or the protocol**

1320 A Serious Breach is an event which is likely to effect to a significant degree:

- 1321 • the safety or physical or mental integrity of the participants of the trial; or  
1322 • the scientific value of the trial.

1323 The BCTU on behalf of the Sponsor shall notify the REC in writing of any serious breach of:

- 1324 • the conditions and principles of GCP in connection with the trial; or  
1325 • the protocol relating to the trial, within 7 days of becoming aware of that breach.

1326 The Sponsor will be notified immediately of any case where the above definition applies during the trial.

1327

1328

1329 **8. DATA MANAGEMENT AND VALIDATION**

1330 **8.1. Source Data**

1331 In order to allow for the accurate reconstruction of the trial and clinical management of the subject, source  
1332 data will be accessible and maintained. Source data is kept as part of the participants' medical notes  
1333 generated and maintained at site. Source data is all information in original records and certified copies of  
1334 original records of clinical findings, observations, or other activities related to the trial.

1335

1336 The CRFs are not the source data, although there are exceptions: the below will be considered source data:

1337

- 1338 • the patient completed questionnaires (see section 6.8);  
1339 • the answer sheets provided for administering the cognitive function tests (see section 11);  
1340 • the save files generated by the cognitive function tests and sleep apnoea monitoring devices (see  
1341 sections 11 and 12);  
1342 • the patient rated score on the neurophysiology CRF (see section 11).

1343 **8.2. Confidentiality of personal data**

1344 This trial will collect personal data about participants. Participants will be informed about the transfer of  
1345 this information to the trial office at BCTU, and will be asked to consent to this. The data will be entered  
1346 onto a secure computer database built, hosted and maintained by BCTU according to University and BCTU  
1347 security and quality policies and procedures. Access to the online trials system is via a secure encrypted  
1348 connection and is restricted to authorised users who have a username and secret password. Functionality  
1349 on the application is restricted based on the user's role. A full audit log of all changes to trial data is  
1350 maintained automatically by the system. BCTU servers are protected by physical and electronic access  
1351 security measures. The servers are kept in a locked air conditioned server room in the BCTU. Server access  
1352 is restricted to named individuals in security groups, with user rights limited to what is needed for their  
1353 role. Data is automatically backed up each night to the College of Medicine and Dentistry file share, and  
1354 then onto tapes which are kept in a fire proof safe.

1355

1356 Any data to be processed outside BCTU will be anonymised. All personal information obtained for the trial  
1357 will be handled and stored in accordance with the Data Protection Act 2018 and the EU General Data  
1358 Protection Regulation 2018, held securely, and treated as strictly confidential.

1359

1360 With the participant's consent, their date of birth and NHS number will be collected to assist with long-  
1361 term follow-up. Participants will be identified using only their unique trial number and date of birth in  
1362 mmm/yyyy format on CRFs and correspondence between the Trial Office and sites.

1363

1364 The patient consent form, which will be sent to BCTU will, out of necessity, contain identifiable personal  
1365 data. These will be stored separately from the study record. The consent form will be sent to BCTU, with  
1366 the patient's consent, to monitor that the consent documentation has been completed correctly.

1367

1368 Samples will be stored as described in section 6.10 above. They will be identified by a unique identifier, visit  
1369 number, and a code describing the sample. This will be recorded on a Sample Log at each visit.  
1370

1371 Investigators will keep their own trial file logs which link participants with anonymised CRFs. The  
1372 Investigator must maintain documents not for submission to the Trial Office (e.g. Participant Identification  
1373 Logs) in strict confidence. In the case of specific issues and/or queries from the regulatory authorities, it will  
1374 be necessary to have access to the complete trial records, provided that participant confidentiality is  
1375 protected.  
1376

1377 The Trial Office will maintain the confidentiality of all participant data and will not disclose information by  
1378 which participants may be identified to any third party other than those directly involved in the treatment  
1379 of the participant and organisations for which the participant has given explicit consent for data transfer.  
1380 Representatives of the IIH:WT trial team may be required to have access to patient notes for quality  
1381 assurance purposes but participants should be reassured that their confidentiality will be respected at all  
1382 times.  
1383

1384 All staff involved in the IIH:WT trial (clinical, academic, BCTU) share the same duty of care to prevent  
1385 unauthorised disclosure of personal information. No data that could be used to identify an individual will be  
1386 published.  
1387

### 1388 **8.3. Long-term storage of data**

1389 In line with Medical Research Council guidelines and the Medicines for Human Use (Clinical Trials)  
1390 Regulations, once data collection is complete on all participants, all data will be stored for at least 20 years.  
1391 Any queries or concerns about the data, conduct or conclusions of the trial can also be resolved in this time.  
1392 Limited data on the participants and records of any adverse events may be kept for longer if recommended  
1393 by an independent advisory board.  
1394

1395 Trial data will be stored within the BCTU under controlled conditions for at least 3 years after closure. Long-  
1396 term offsite data archiving facilities will be considered for storage after this time. The BCTU has standard  
1397 processes for both hard copy and computer database legacy archiving. Archiving will be authorised by the  
1398 BCTU on behalf of University of Birmingham following submission of the end of trial report.  
1399

1400 PI's are responsible for the secure archiving of essential trial documents (for their site) as per their NHS  
1401 Trust policy. All essential documents will be archived for a minimum of 5 years after completion of trial.  
1402

### 1403 **8.4. Data management**

1404 The IIH:WT trial will not use double data entry. Data is validated by pop-ups on the database when out of  
1405 range and by random checks. All data entry will be done by BCTU staff. All missing and ambiguous data will  
1406 be queried using Data Clarification Forms (DCFs). Responses should be made on the DCF. The original DCF  
1407 should be copied and the copy attached to the CRF to which it relates. The DCF should be returned to the  
1408 trial office. A separate data management document will be created by the trial office.  
1409

### 1410 **8.5. Definition of the End of Trial**

1411 The end of trial will be 1 month after the last data capture-related query is resolved. The last data capture  
1412 will be 60 months following recruitment of the last participant.  
1413

1414 The BCTU trial team will notify the REC and Sponsor that the trial has ended and a summary of the clinical  
1415 trial report will be provided within 12 months of the end of trial.  
1416  
1417

## 1418 9. STATISTICAL CONSIDERATIONS

### 1419 9.1. Sample size

1420 Total n=64. 32 participants in each arm (bariatric surgery versus diet).

1421

1422 For this study we are hypothesising that the greater weight loss anticipated in the bariatric surgery arm  
1423 compared to the dietary weight loss arm will consequently reduce the ICP further in the bariatric arm than  
1424 in the dietary weight loss arm. Bariatric surgery patients typically lose  $31\% \pm 3\%$  of body weight by 12  
1425 months [13]). A weight loss of  $15.3\% \pm 7.0\%$  of body weight over 3 months was achieved by patients  
1426 following a low calorie diet [10]. Data from this study showed that ICP was significantly reduced by 20% (ICP  
1427 at baseline in 20 IIH patients was  $39.8 \pm 5.1$  cmCSF and ICP was reduced by  $8 \pm 4.2$  cmCSF,  $p < 0.001$ ).

1428

1429 If we assume a conservative change of ICP in the bariatric surgery arm to that previously observed of 8  
1430 cmCSF and a change of 3cmCSF in the dietary weight loss arm (a value to reflect changes slightly greater  
1431 than the baseline fluctuations seen in our previous study), then we are looking to detect a mean difference  
1432 of 5cmCSF between the groups. To detect this difference of 5cmCSF with 90% power and  $\alpha=0.05$  using  
1433 a 2-sided t-test (assuming a standard deviation of 5.1 [10]) requires a total of 46 patients (23 per arm). If we  
1434 allow for a 28% drop out rate, then we will need to recruit 32 patients per arm, 64 patients in total.

1435

1436 We believe that the SD of 5.1 is a true reflection of the variability of the data as this is taken from the  
1437 baseline measurements from our previous study, which is a similar population to that being recruited into  
1438 this study [10]. However, this assumption for the sample size calculation will be monitored during the trial  
1439 as part of the interim analyses.

1440

### 1441 9.2. Projected accrual and attrition rates

1442 Recruitment for our previous study with very similar inclusion criteria was at a rate of 1.5 participants per  
1443 month [10]; we consequently feel that the recruitment target of 1.5 participants per month (64 participants  
1444 over 45 months) is realistic and achievable. Attrition rates for this treatment and patient group is not  
1445 known; we have allowed a 28% rate of drop out.

1446

### 1447 9.3. Statistical Analysis

1448 A separate Statistical Analysis Plan for the IIH:WT trial will be produced and will provide a more  
1449 comprehensive description of the planned statistical analyses for the primary and secondary outcome  
1450 measures. A brief outline of these analyses is given below.

1451

1452 The primary comparison groups will be composed of those randomised to the bariatric surgery arm and  
1453 those randomised to the dietary weight loss arm. In the first instance, all analyses will be based on the  
1454 intention to treat principle, i.e. all patients will be analysed in the treatment group to which they were  
1455 randomised irrespective of compliance with the randomised allocated treatment or other protocol  
1456 violation. For all major outcome measures, summary statistics and differences between groups (e.g. mean  
1457 differences, relative risks) will be reported, with 95% confidence intervals and p-values from two-sided  
1458 tests also given. Outcomes will be adjusted for the stratification variable listed in section 4.6. For all  
1459 analyses, a p-value  $< 0.05$  will be considered statistically significant and there will be no adjustment for  
1460 multiple testing.

1461

#### 1462 Primary Outcome Analysis

1463 The primary outcome will assess the ICP at 12 months. Data will be reported with means and standard  
1464 deviations or medians and ranges for non-parametric data. The ICP at 12 months for the two study arms  
1465 will be compared using a linear regression model with baseline ICP and acetazolamide use at entry  
1466 (stratification variable) included as covariates in the model.

1467

#### 1468 Secondary Outcome Analyses

1469 Secondary outcome measures include a mixture of continuous and categorical data items. Continuous  
1470 outcomes (e.g. quality of life) will be analysed as per the primary outcome measure. Categorical outcomes

1471 (e.g. presence or absence of symptoms, number of CSF shunting referrals) will be expressed as the number  
1472 and percentage of patients experiencing these outcomes in the two groups. Log-binomial models will be  
1473 used to compare the data between the two study arms, with baseline data (where available, i.e. baseline  
1474 symptom data) and acetazolamide use at entry (stratification variable) included in the model as covariates.  
1475

#### 1476 **9.4. Missing Data and Sensitivity Analyses**

1477 Our primary analysis will be by intention to treat using complete cases. Where data are missing, we will  
1478 perform sensitivity analyses to assess how different reasons for the missing data might have impacted upon  
1479 the results. Sensitivity analyses will include adopting a “baseline value carried forward approach” (i.e.  
1480 assume no change in ICP for drop-outs). For more details regarding the sensitivity analyses, please refer to  
1481 the Statistical Analysis Plan.  
1482

#### 1483 **9.5. Subgroup Analyses**

1484 The randomisation will be stratified according to whether or not participants are taking acetazolamide or  
1485 not at entry into the trial to ensure balance across the two treatment arms. There are no planned  
1486 subgroups analyses for this trial.  
1487

#### 1488 **9.6. Interim Analyses**

1489 Interim analyses of efficacy and safety are planned annually. These interim analyses will be reviewed by the  
1490 independent Data Monitoring Committee (DMC) on an annual basis or more frequently if required by the  
1491 DMC or Trial Steering Committee. A DMC report and charter outlining the terms of reference (including  
1492 information on stopping rules) will be agreed with the DMC. See section 13.3 for further information on the  
1493 DMC.  
1494

#### 1495 **9.7. Final Analyses**

1496 The first analysis of the main trial data for publication will be completed once every patient has completed  
1497 12 months follow-up. The final analysis for the IIH:WT trial will occur once the last randomised patient  
1498 reaches the 5 year follow-up assessment.  
1499  
1500

## 1501 **10. HEALTH ECONOMIC OUTCOMES**

### 1502 **10.1. Health economic outcomes**

1503 The following analysis will be undertaken:  
1504

1505 **Cost-effectiveness analysis** – Primary trial outcome: ICP measured at baseline and 12 months  
1506 will be evaluated in terms of cost to reduce the ICP by 12.5%. This will inform the cost-  
1507 effectiveness analysis and information will come from the trial data.  
1508

1509 1. **Cost-utility analysis** – Utility data collected at baseline and 12 months using the EQ-5D-5L and  
1510 ICECAP-A questionnaires. The utility information from the responses to this questionnaire will  
1511 be used to estimate Quality-Adjusted Life Years (QALYs).  
1512

1513 2. **Cost-benefit analysis** – Monetary outcomes will be measured using the ‘Willingness to Pay’  
1514 (WTP) method. A WTP question will be asked at baseline and at 12 months in both cohorts of  
1515 participants (surgery and dietary weight loss programme groups). The question will ask for  
1516 WTP for treatment before and after the treatment takes place hence will ask for values from  
1517 both an ex-ante and an ex-post perspective.  
1518  
1519  
1520

1521 **10.2. Overall objective**

1522 The overall objective of the economic component of this trial will be to measure the costs and outcomes to  
 1523 assess the cost-effectiveness of bariatric surgery and dietary weight loss programme for treatment of IIH.

1524

1525 Specific objectives:

- 1526 1. To measure the costs from both a health care and a societal perspective.
- 1527 2. To apply the WTP method from both an ex-ante (before intervention) and ex-post (after  
 1528 intervention) perspective.
- 1529 3. To measure the productivity costs associated with having IIH and the impact the intervention has  
 1530 on these productivity costs.
- 1531 4. To use the EQ-5D-5L as an outcome measure to derive QALYs.
- 1532 5. To use the ICECAP-A as an outcome measure for capabilities.
- 1533 6. To conduct a cost-utility analysis using QALYs (derived from EQ-5D-5L) as the outcome.
- 1534 7. To conduct a cost-effectiveness analysis using ICP as the primary outcome.
- 1535 8. To conduct a cost-benefit analysis by incorporating productivity costs and using WTP values as the  
 1536 unit of outcome.

1537 **10.3. Methods**

1538 **Cost data collection**

1539 Primary data on costs and resource use will be collected prospectively alongside the trial. The process of  
 1540 collecting resource use data will be undertaken separately from data collection on unit costs. Table 6  
 1541 overleaf summarises the type of resource use, method of collection and timing of collection within the trial.

1542

1543 The costing will be divided up into the measurement of health service costs and costs associated with  
 1544 productivity loss related to IIH. Productivity loss associated with IIH will be measured by estimating the  
 1545 rate of absenteeism (days of work missed because of illness) and presenteeism (days at work but limited in  
 1546 performing job tasks because of ill health). The productivity loss associated with IIH will be directly  
 1547 compared for the surgical cohort versus the diet cohort.

1548

1549 For the health service resource use, unit costs will be obtained and attached to the resource use items to  
 1550 estimate patient-specific costs. Unit costs will be obtained from published sources.

1551

1552 **Outcome data collection**

1553 Four types of outcome data will inform the economic analysis and will determine the type of economic  
 1554 evaluation undertaken:

1555

1556 **For cost-effectiveness analysis** - Primary study outcome: ICP measured at baseline and 12 months. This  
 1557 will inform the cost-effectiveness analysis. This information will come from the trial data.

1558

1559 **For cost-utility analysis** – utility data collected at baseline and 12 months using the EQ-5D-5L and ICECAP-A  
 1560 questionnaires. The utility information from the responses to this questionnaire will be used to estimate  
 1561 QALYs.

1562

1563 **For cost-benefit analysis** – monetary outcomes will be measured using the WTP method. A WTP question  
 1564 will be asked at baseline and at 12 months in both cohorts of participants (surgery and dietary weight loss  
 1565 programme groups). The question will ask for WTP for treatment before and after the treatment takes  
 1566 place hence will ask for values from both an ex-ante and an ex-post perspective.

1567

1568 **ICECAP-A** – capabilities outcomes will be measured at baseline and at 12 months in both cohorts and will  
 1569 feed into a wider perspective analysis therefore will be part of cost-benefit analysis.

1570

1571

1572 **Table 6: Health economics data collection**

| Cost item                                       | Resources Used                                                                                                                                                                                                                                                                                                                                                                                                                                                                                                                                                          | Collection method                                                                                                                                                                                                                                                                                                                                                                                                                                    | Timing                                                                                                                                                                                                                        | Resource use collection instrument                                                                 |
|-------------------------------------------------|-------------------------------------------------------------------------------------------------------------------------------------------------------------------------------------------------------------------------------------------------------------------------------------------------------------------------------------------------------------------------------------------------------------------------------------------------------------------------------------------------------------------------------------------------------------------------|------------------------------------------------------------------------------------------------------------------------------------------------------------------------------------------------------------------------------------------------------------------------------------------------------------------------------------------------------------------------------------------------------------------------------------------------------|-------------------------------------------------------------------------------------------------------------------------------------------------------------------------------------------------------------------------------|----------------------------------------------------------------------------------------------------|
| Costs of surgery (health service costs)         | <p>Pre-operative:<br/>Outpatient visits;<br/>Dietician consultations;<br/>psychologist appointments.</p> <p>Surgery:<br/>Theatre time; Length of hospital stay; length of stay in ITU; length of stay in HDU.</p> <p>Conversion rate from laparoscopic to open surgery and Complications / revisions:<br/>Mortality; incisional hernias;<br/>apronectomy; repeat surgery.</p> <p>Post-discharge and general health service costs:<br/>GP visits, practice nurse visits, district nurse visits.<br/>Outpatient visits, dietician contacts, psychology consultations.</p> | <p>Pre-op:<br/>Pre-op Form will be completed by Trial team by audit of hospital notes.</p> <p>Surgery data will be collected on Surgery Form completed by audit of hospital notes</p> <p>Complications data will be collected on Surgery Form completed by audit of hospital notes</p> <p>Post-discharge:<br/>Outpatient activity collected by hospital audit.<br/>GP visits and outpatient appointments collected by participant questionnaire.</p> | <p>This information will be collected as an ongoing process throughout the trial.</p> <p>The post-discharge data and general health service costs will be collected by participant questionnaire at 12, 24 and 60 months.</p> | <p>Data collection by audit of hospital notes by Trial team.</p> <p>Participant questionnaire.</p> |
| Costs of Weight Watchers (health service costs) | <p>Unit cost of joining the Weight Watchers programme.</p> <p>General health service costs:<br/>GP visits, practice nurse visits, district nurse visits.<br/>Outpatient visits.</p>                                                                                                                                                                                                                                                                                                                                                                                     | <p>£48.50+VAT per 3 months</p> <p>Participant questionnaire.</p>                                                                                                                                                                                                                                                                                                                                                                                     | <p>This will be recorded with each batch of Weight Watchers vouchers handed to participants.</p> <p>The general health service costs will be collected by participant questionnaire at 12, 24 and 60 months.</p>              | <p>Trial information (for Weight Watchers cost).</p> <p>Participant questionnaire.</p>             |
| Productivity costs                              | <p>Absenteeism: Number of days of work missed because of IIH.</p> <p>Presenteeism: Number of days at work but limited in performing work-related tasks.</p>                                                                                                                                                                                                                                                                                                                                                                                                             | <p>Participant questionnaire.</p>                                                                                                                                                                                                                                                                                                                                                                                                                    | <p>Baseline; 12 months; 24 months; 60 months.</p>                                                                                                                                                                             | <p>Participant questionnaire.</p>                                                                  |

1573

1574



1575 **10.4. Economic evaluation**

1576 **Trial-based analysis**

1577 The first stage will be a within-trial cost-effectiveness analysis based on the outcome of 5, 10%, 20 and 30%  
1578 reduction in ICP. The secondary outcome will be QALYs. A decision-tree model will be used to conduct the  
1579 within-trial analysis. The analysis will adopt an incremental approach in that data collection will concentrate  
1580 on resource use and outcome differences between the two trial arms. Appropriate one-way and multi-way  
1581 deterministic sensitivity analysis will be carried out to test the robustness of the results.

1582  
1583 **Beyond the trial period**

1584 The results of the trial-based analysis will feed into a longer-term Markov decision analytic model if the  
1585 trial-based analysis suggests a significant impact as a result of the bariatric surgery. If this is the case, the  
1586 results of the trial-based model will be extrapolated beyond the trial period by using a Markov simulation  
1587 model that will estimate health gains and cost-effectiveness over a lifetime. Data to populate this longer-  
1588 term model will come from published sources that will be subject to quality criteria. Costs and benefits will  
1589 be discounted at 3.5%. The economic analysis will be presented using cost-effectiveness acceptability  
1590 curves to reflect sampling variation and uncertainties in the threshold cost-effectiveness values where  
1591 appropriate. The robustness of the results will be explored using sensitivity analysis.

1592  
1593

1594 **11. EXPLORATORY SUB-STUDIES**

1595 There are a number of optional exploratory sub-studies. These are detailed in sections 11 and 12.

1596

1597 **11.1. Exploratory Aims**

1598

1599 **Sleep apnoea**

- 1600 • To evaluate the relationship of Obstructive Sleep Apnoea (OSA) to visual function in participants  
1601 with IIH.
- 1602 • To evaluate the impact of weight loss on OSA.

1603

1604 **Metabolic syndrome**

- 1605 • To evaluate changes in Framingham cardiovascular disease score and metabolic parameters  
1606 between baseline and 12 months.
- 1607 • To evaluate changes in insulin sensitivity and lipids between baseline and 12 months.
- 1608 • To evaluate changes in the Utah Early Neuropathy Score, peripheral nerve fibre conduction and  
1609 intraepidermal nerve fibre density between baseline and 12 months.

1610

1611 **Magnetic resonance imaging (MRI)**

- 1612 • To evaluate changes in venous sinus compression observed on magnetic resonance venography  
1613 between baseline and 12 months.

1614

1615 **Cognitive function**

- 1616 • To evaluate changes in cognitive function between baseline and 12 months.
- 1617 • To evaluate the relationship between cognitive function and headache disability scores / index,  
1618 depression scores, sleep apnoea scores, ICP and BMI.

1619

1620

1621

1622

1623

1624  
1625  
1626  
1627  
1628  
1629  
1630  
1631  
1632  
1633  
1634  
  
1635  
1636  
1637  
1638  
1639  
1640  
1641  
1642  
1643  
1644  
  
1645  
1646  
1647  
1648  
1649  
1650  
1651  
1652  
1653  
1654  
1655  
  
1656  
1657  
1658  
1659  
1660  
1661  
1662  
1663  
1664  
1665  
1666  
1667  
1668  
1669  
1670

### **Matched obese control group**

- To evaluate the baseline difference in ICP, visual function, headache disability, sleep apnoea, cognitive testing, features of the metabolic syndrome, and biomarker analysis between IIH participants and a matched obese control cohort.

### **MRI test run group**

- To validate the novel MRI scan sequences being used in the MRI sub-study above.

### **Biomarkers**

- To evaluate the changes in hormonal, inflammatory, oxidative stress and neuropeptide biomarkers between baseline and 12 months.

## **11.2. Exploratory Outcome Measures**

- Change in apnoea-hypopnoea index from 0 to 12 months
- Change in markers of peripheral neuropathy and metabolic syndrome from 0 to 12 months
- Change in MRI (including venous stenoses) from 0 to 12 months
- Change in cognitive function from 0 to 12 months
- Change in biomarkers from 0 to 12 (and 24 and 60) months
- Comparison between IIH patients and the matched control group at baseline with regards to apnoea-hypopnoea index, peripheral neuropathy and metabolic syndrome (including allodynia), MRI, cognitive function, and biomarkers
- Change in MRI over a double baseline period of healthy controls.

## **11.3. Changes to participant pathway to incorporate sub-studies**

The participant pathway at sites taking part in any of the sub-studies will vary from that described in section 6.1 to accommodate the exploratory outcomes. At pre-screening, sub-study participants may additionally be asked to:

- Give a 24 hour urine sample (which will be used in the analysis of biomarkers if they subsequently consent to join the trial) – a urine bottle will be provided, and the urine sample should be completed the day before the appointment; and
- Return home with a sleep apnoea home study device to record two nights of their sleep data (which will be used together with the sleep questionnaires in the sleep apnoea sub-study if they subsequently consent to join the trial).

The screening/baseline day and the 0, 12, 24 and 60 month visits will vary to accommodate the exploratory outcomes as shown in table 7 overleaf:

1671

**Table 7: Outcome measures and assessments showing all optional exploratory outcomes**

| Outcome                   | Measure                                                                                                  | Pre-screening visit           | Baseline | 3 months | 6 months | Post-op | (Primary endpoint) 12 m | 24 months | 60 months |
|---------------------------|----------------------------------------------------------------------------------------------------------|-------------------------------|----------|----------|----------|---------|-------------------------|-----------|-----------|
| <b>Primary outcome</b>    |                                                                                                          |                               |          |          |          |         |                         |           |           |
| Intracranial pressure     | Lumbar puncture                                                                                          |                               | x        |          |          | x       | x                       | x         | x         |
| <b>Secondary outcomes</b> |                                                                                                          |                               |          |          |          |         |                         |           |           |
| Eligibility               | Pregnancy test                                                                                           |                               | x        |          |          |         |                         |           |           |
| Weight                    | BMI                                                                                                      |                               | x        | x        | x        | x       | x                       | x         | x         |
|                           | Waist/hip ratio                                                                                          |                               | x        | x        | x        | x       | x                       | x         | x         |
|                           | Blood pressure                                                                                           |                               | x        | x        | x        | x       | x                       | x         | x         |
|                           | Body composition using Tanita scales                                                                     |                               | x        | x        | x        | x       | x                       | x         | x         |
| Visual assessments        | Visual acuity and contrast sensitivity                                                                   |                               | x        |          |          |         | x                       | x         | x         |
|                           | Humphrey visual field (24-2)                                                                             |                               | x        |          |          |         | x                       | x         | x         |
|                           | Ishihara colour assessment                                                                               |                               | x        |          |          |         | x                       | x         | x         |
|                           | Optical coherence tomography                                                                             |                               | x        |          |          |         | x                       | x         | x         |
|                           | Retinal photographs                                                                                      | x                             |          |          |          |         | x                       | x         | x         |
| Headache assessments      | Headache Impact Test 6                                                                                   | x                             |          |          |          |         | x                       | x         | x         |
|                           | Post-LP Headache diary                                                                                   |                               | x        |          |          | x       | x                       | x         | x         |
|                           | Headache diary                                                                                           | x                             |          |          |          |         | x                       | x         | x         |
| Quality of Life           | EQ-5D-5L                                                                                                 |                               | x        |          |          |         | x                       | x         | x         |
|                           | ICECAP-A                                                                                                 |                               | x        |          |          |         | x                       | x         | x         |
|                           | SF-36 Version 1                                                                                          |                               | x        |          |          |         | x                       | x         | x         |
|                           | Hospital Anxiety and Depression (HAD) score                                                              |                               | x        |          |          |         | x                       | x         | x         |
|                           | Allodynia Symptom Checklist-12                                                                           |                               | x        |          |          |         | x                       | x         | x         |
|                           | Brain imaging                                                                                            | Magnetic resonance venography |          | x        |          |         |                         | x         |           |
| Health Economics          | Cost-effectiveness, -utility and -benefit                                                                |                               | x        |          |          |         | x                       | x         | x         |
| Biomarkers                | Blood                                                                                                    |                               | x        |          |          | x       | x                       | x         | x         |
|                           | 24 hours urine sampling                                                                                  | x                             |          |          |          |         | x                       |           |           |
|                           | CSF                                                                                                      |                               | x        |          |          | x       | x                       | x         | x         |
|                           | Meal stimulation                                                                                         |                               | x        |          |          | x       | x                       | x         | x         |
| Sleep apnoea              | Home based sleep studies                                                                                 | x                             |          |          |          |         | x                       |           |           |
|                           | Epworth Sleepiness Scale, Berlin questionnaire                                                           |                               | x        |          |          |         | x                       |           |           |
|                           | STOP-Bang                                                                                                |                               | x        |          |          |         | x                       |           |           |
| Cognitive testing         | Verbal working memory test, Attention Network Test – Interactions (ANT-I), Sustained attention test etc. |                               | x        |          |          |         | x                       |           |           |

|                         |                                                                               |   |   |   |   |   |   |   |
|-------------------------|-------------------------------------------------------------------------------|---|---|---|---|---|---|---|
| Neurophysiology testing | Neuropathy screen, allodynia screen, basic electrophysiology and punch biopsy | x |   |   |   |   |   | x |
| Control group           | Full baseline assessments                                                     | x |   |   |   |   |   |   |
| SAE monitoring          | SAE forms                                                                     | x | x | x | x | x | x | x |

1672

1673

**11.4. Sleep apnoea observational cohort sub-study**

1674

1675

1676

1677

1678

1679

1680

1681

1682

1683

1684

An association between OSA and IIH is well documented, although prevalence is unknown and causality has not been demonstrated [36]. Recent interest has focused on the role of OSA, with resulting intermittent hypoxia, in exacerbating microscopic angiopathies such as diabetic retinopathy [37]. OSA has also been associated with optic nerve ischaemia in glaucoma and non-arteritic ischaemic optic neuropathy [38]. We suggest that OSA may exacerbate optic nerve infarction resulting from papilloedema in IIH, and represent a risk factor for developing visual loss. Therefore an observational cohort study will be conducted with assessments of OSA at baseline and at 12 months.

**Objectives for sleep apnoea sub-study**

**Primary objectives:**

- To evaluate the relationship of the apnea-hypopnea index to visual function in patients with IIH.

1685

1686

1687

**Secondary objectives:**

- To evaluate the impact of weight loss through either bariatric surgery or dietetic intervention on the apnea-hypopnea index.

1688

1689

1690

1691

1692

1693

1694

1695

1696

1697

**Method for sleep apnoea sub-study**

Participants will be assessed for sleep apnoea at baseline and 12 months (obese controls at baseline only). A member of the local research team will explain to the participant how to use the sleep observation device, which the participant will then take home. It will be programmed by the research nurse to record a set period of 12 hours, and the participant will monitor their sleep over 2 nights. The night which provides the most complete data will be assessed. Sleep studies will be scored in accordance with the American Academy of Sleep Medicine guidelines [39]. Where both nights' sleep studies provide <4 hours of adequate recordings they will be repeated if possible and if the quality remains poor they will be excluded from analysis.

1698

1699

1700

1701

1702

An apnea-hypopnea index score of (AHI)  $\geq 5$  events/hour will be considered consistent with OSA diagnosis. OSA severity will be assessed based on the AHI, oxygen desaturation index (the number of oxygen desaturations of  $\geq 4\%$  per hour) and lowest oxygen saturation. OSA will be classified into mild, moderate and severe based on AHI  $\geq 5$ , 5-14, 15-29, and  $\geq 30$  events/hour respectively.

1703

1704

1705

The data will be scored by a sleep specialist blinded to the participant's treatment arm and quality controlled by a second specialist in sleep medicine by checking a subset of the data.

1706

**11.5. Metabolic syndrome sub-study**

1707

1708

1709

1710

1711

1712

1713

1714

Our preliminary (currently unpublished) data indicates that patients with IIH (n=29) have features of metabolic syndrome including increased waist circumference (106.5 $\pm$ 10.2cm), increased Homeostasis Model Assessment scores (2.1 $\pm$ 2.1) (normal scores are less than 1), elevated fasting insulin (14.3 $\pm$ 6.4 $\mu$ U/ml) and glucose: insulin ratios (0.41 $\pm$ 0.20), with the latter two variables being significantly higher than in a cohort of matched obese controls (p=0.036 and p=0.027 respectively). These results suggest that IIH patients may be at increased risk of developing diabetes and cardiovascular disease in later life. Consequently, morbidity in IIH may extend beyond headaches and visual loss.

1715

1716

Peripheral neuropathy (PN) is a common complication of diabetes, but has also been linked to the metabolic syndrome [40], more specifically pre-diabetes [41] and hypertriglyceridaemia [42]. PN is disabling

1717 as it produces pain and discomfort in the lower limbs which may progress to weakness and sensory loss,  
1718 resulting ultimately in difficulties with balance and gait. PN may recede with appropriate dietary, lifestyle,  
1719 and exercise interventions as suggested in patients with pre-diabetes [43]. The prevalence of PN has to our  
1720 knowledge not previously specifically been evaluated in patients with IIH, but may contribute to morbidity  
1721 with this population.

1722

1723 We propose as part of the current trial to evaluate the presence of co-existing PN in patients with IIH and to  
1724 evaluate the effects of the interventions of this trial on objective markers of PN in the participants.

1725

### 1726 **Objectives for metabolic syndrome sub-study**

#### 1727 **Primary objective:**

- 1728 • To evaluate the presence of PN and metabolic syndrome in patients with IIH.

#### 1729 **Secondary objectives:**

- 1730 • To evaluate the impact of weight loss through either bariatric surgery or dietetic intervention on  
1731 objective markers of PN.

### 1732 **Method for metabolic syndrome sub-study**

1733 Participants will undergo a clinical neuropathy screen using the Utah Early Neuropathy Score (UENS) [44] as  
1734 part of the baseline assessment and the 12 month assessment (obese controls at baseline only). This score  
1735 is appropriate in this setting as it has been validated in subjects with diabetes and pre-diabetes, is easy and  
1736 quick to perform, and allows detection of mild cases of PN. The UENS requires a basic routine neurological  
1737 examination assessing the strength, sensation and reflexes. This takes about 10 minutes.

1738

1739 In addition participants will undergo basic electrophysiology (nerve conduction studies) which will provide  
1740 objective measurement of large nerve fibre function, which may be impaired in PN. This requires electrical  
1741 pulses delivered over the surface of the skin with recordings performed also over the skin surface, in upper  
1742 and lower limbs to study 2 motor nerves (unilateral common peroneal and tibial in their lower leg  
1743 segments) and 4 sensory nerves (bilateral radial and bilateral sural). These may cause mild discomfort or  
1744 tingling, but are not generally considered painful nor accompanied by adverse effects. This will take about  
1745 10 minutes. The range of values used to define normal response will be those available from recent  
1746 literature using similar equipment [45].

1747

1748 Finally, as PN may result in damage exclusively to the small nerve fibres which cannot be detected by  
1749 electrophysiology, we intend to perform a 3mm punch skin biopsy at the lower leg with appropriate sterile  
1750 technique [46]. This is performed under a local anaesthetic and consequently is not painful. The procedure  
1751 takes about 15 minutes in total. The superficial skin sample collected will then be studied for the  
1752 intraepidermal nerve fibre density which is a marker of small nerve fibre function.

1753

1754 Alongside the screening for PN we will also measure anthropometric measurements (BMI, waist/hip and  
1755 body composition using Tanita scales); Framingham Risk Score \*\*; and take bloods (fasting glucose, insulin,  
1756 cholesterol and triglycerides will be measured) to calculate HOMA scores and evaluate insulin sensitivity.

1757

1758 The following assessments will be added to the participant pathway at baseline/screening and 12 month  
1759 visits:

- 1760 • **Neurophysiology:** Participants will undergo a clinical neuropathy screen using the Utah Early  
1761 Neuropathy Score, allodynia testing as described by LoPinto [47], and basic electrophysiology  
1762 testing for the metabolic syndrome sub-study as described in 11.7.2 above. The neurophysiology  
1763 testing will take around 20 minutes in total. These assessments will be reported on an additional  
1764 CRF:

---

\*\* Framingham Risk Score is an algorithm using age, gender, cholesterol levels, blood pressure and smoking status to evaluate an individual's 10 year cardiovascular risk score.

- 1765 • Neurophysiology Form: to be completed by the clinicians who will be carrying out the  
1766 relevant standard clinical practice assessments or from their patient notes.  
1767
- 1768 • **Skin biopsy sample:** Participants will then undergo a 3mm punch skin biopsy at the lower leg with  
1769 appropriate sterile technique and under local anaesthetic. This will take around 15 minutes in total.

### 1770 **11.6. Magnetic resonance imaging in IIH sub-study**

1771 The overall aim of this sub-study is to characterise magnetic resonance imaging features in IIH and to  
1772 evaluate the potential role of these features as imaging biomarkers for diagnosis and for monitoring  
1773 disease progression.  
1774

1775 We will look particularly at the role of brain compliance in IIH using a non-invasive MRI-based technique  
1776 called MR-ICP. Compliance is a measure of the ability of the brain to respond to changes in fluid  
1777 distribution. A compliant brain is able to tolerate changes in fluid balance without suffering from major  
1778 elevation in ICP, while a non-compliant brain loses this capability. In IIH, we note raised ICP in the absence  
1779 of hydrocephalus (dilated ventricles), and thus it is likely that brain biomechanics in general, and more  
1780 specifically the stiffness of brain tissue, is an important mediating factor in disease development.  
1781

1782 A novel MRI-based technique capable of noninvasively assessing intracranial compliance and potentially  
1783 measuring ICP, (termed “MR-ICP”) has been developed and shows great promise in early studies [48-51].  
1784 MR-ICP now needs evaluation in the clinical setting.  
1785

1786 Cerebral venous sinus compression is well documented in IIH [7] which may further exacerbate CSF  
1787 drainage at the arachnoid granulation tissue [8]. Venous stenoses are a target for therapeutic stenting in  
1788 some centres. Changes in the calibre of the venous sinuses are noted in up to 90% of IIH patients [52] and  
1789 the presence of these stenoses as an imaging biomarker in IIH has been suggested, although the finding can  
1790 occur in other conditions characterised by elevated ICP [52, 53]. Additionally, volumetric assessment of the  
1791 optic nerve sheath in IIH has been shown to vary with ICP [54]. No studies have yet assessed the impact of  
1792 weight loss on venous sinus stenoses in IIH.  
1793

1794 Other imaging features characteristic of IIH include “empty sella”, optic nerve sheath distension, and  
1795 posterior optic globe flattening, but these do not correlate with LP measures of ICP [54].  
1796

### 1797 **Objectives for magnetic resonance imaging sub-study**

#### 1798 **Primary objective:**

- 1799 • To evaluate MRI in patients with active IIH (at baseline) and then after 12 months of therapeutic  
1800 weight loss (achieved through bariatric surgery or dietary weight loss programme).  
1801

#### 1802 **Secondary objectives:**

- 1803 • To evaluate the relationship between MRI and ICP and papilloedema as measured by ocular  
1804 coherence tomography.  
1805 • To evaluate magnetic resonance venography (MRV) imaging (cranial venous outflow obstruction  
1806 index) [55] pre- and post- bariatric surgery/dietary weight loss to establish if venous stenoses are modified  
1807 by weight loss and, using multivariate regression analysis, evaluate their relationship to ICP and visual  
1808 function.  
1809

### 1810 **Method for imaging sub-study**

1811 We will use MRI (3 Tesla scanner) to measure brain stiffness or membrane compliance (e.g. ventricles) as  
1812 well as volumetric changes in the optic nerve sheath, alterations in calibre of the venous sinuses using MR-  
1813 ICP, diffusion tensor imaging and MRV. These sequences take about 30 minutes of scanning time.  
1814

1815 Participants will be imaged at baseline and at 12 months using these techniques (obese controls at baseline  
1816 only). Additionally, in order to characterise the immediate effects of reduction in ICP, 5 of these

1817 participants will be imaged additionally, after their baseline LP, enabling measurement pre- and post- LP on  
1818 the same day. We will sequentially ask participants until 5 have agreed to this. This will be done only at  
1819 baseline.

1820

### 1821 **11.7. Cognitive function sub-study**

1822 Patients with IIH frequently describe memory impairment and a recent retrospective study of 10 IIH  
1823 patients has provided evidence that cognitive deficits likely exist in patients with IIH [56]. However there  
1824 has been very little formal testing to characterise cognitive deficits in IIH [57, 58]. Additionally, there has  
1825 been no evaluation of the extent to which the different features, symptoms and co-morbidities of IIH  
1826 (headache, depression, raised ICP, obesity, sleep apnoea) contribute towards cognitive dysfunction.

1827

1828 Migrainous headaches, a phenotype of headache frequently experienced by IIH patients [59], have been  
1829 shown to impair cognition compared to headache free periods [60]. Cognitive impairment is a well-  
1830 recognised feature in conditions characterised by chronically raised ICP such as hydrocephalus [61, 62] and  
1831 normal pressure hydrocephalus [63]. Additionally, depression, a frequent co-morbid condition in IIH, has  
1832 been linked to deficits in memory and attention [64, 65]. Obesity and OSA are also linked to impaired  
1833 cognition [66, 67]. It is intriguing to speculate that dysfunction of the cortisol generating enzyme 11 $\beta$ -  
1834 hydroxysteroid dehydrogenase, a characteristic feature of obesity and IIH, could contribute to cognitive  
1835 deficits in IIH [68, 69].

1836

1837 Cognitive screening of trial participants will be conducted. These tests will all involve looking at different  
1838 images on a screen and making a response to evaluate cognitive function and are described below.

1839

### 1840 **Objectives for cognitive evaluation sub-study**

#### 1841 **Primary objective:**

- 1842 • To evaluate cognitive function in patients with active IIH (at baseline) and then after 12 months of  
1843 therapeutic weight loss (achieved through bariatric surgery or dietary weight loss programme)

#### 1844 **Secondary objectives:**

- 1845 • To evaluate the relationship between cognitive function and headache disability scores / index,  
1846 depression scores, sleep apnoea scores, ICP and body mass index.

### 1847 **Method for cognitive sub-study**

1848 Participants will undergo a battery of cognitive tests at baseline and 12 months (obese controls at baseline  
1849 only). Headache severity at the time of the test will be rated by the participant on a scale of 0-10.

1850

1851 The following assessments will be added to the participant pathway at baseline/screening and 12 month  
1852 visits:

- 1853 • **Cognitive testing:** Cognitive tests will be conducted as described below by a research nurse. Tests  
1854 will take approximately one hour using a computer. The participant will be asked to grade their  
1855 headache from 0-10 before undergoing the test (and again before undergoing the single repeated  
1856 Sustained Attention to Response Task after LP):

#### 1857 **1. Verbal Short-Term Memory: Word Span (15 minutes)**

1858 Participants recall sequences of one- and two-syllable nouns that are presented in lowercase for 1 second  
1859 each, with a 500 ms blank screen between each word. Participants name each word aloud as it appears. Set  
1860 sizes range from two to seven words, with each set size presented three times (18 sets total). No word  
1861 appears more than once during the task.

1862

#### 1863 **2. Verbal Working Memory: Operation Span (15 minutes)**

1864 Participants recall words against a background arithmetic task. Each display includes a mathematical  
1865 problem followed by a to-be-remembered word (e.g., "Is  $(7 \times 2) - 1 = 13$ ?" "Car"). The arithmetic operation  
1866 begins with a parenthetical multiplication or division problem (each equally represented) followed by a

1867 number to add to or subtract from the product or dividend (each equally represented). As soon as the  
1868 equation appears, participants read the equation aloud. They say, "yes" or "no" out loud to indicate  
1869 whether the equation is correct or incorrect (correct and incorrect equations are shown approximately half  
1870 the time each).

1871

### 1872 **3. The Attention Network Test-Interactions (20 minutes)**

1873 This is used to measure the alerting, orienting, and executive components of attention, and the interactions  
1874 among these networks. A fixation cross is presented in the centre of the screen, and remains on the screen.  
1875 An auditory signal is presented for 50 ms on half of trials, between 400 and 1600 ms after each trial is  
1876 started. At 450 ms after the onset of the auditory signal, a visual cue is presented either above or below  
1877 fixation on two-thirds of trials, lasting 100 ms. The target is the centre arrow in a set of five arrows that  
1878 appears either above or below the fixation. The task is to report the direction of the centre arrow; the  
1879 arrows flanking the centre arrow are either congruent in direction with the centre arrow, or incongruent in  
1880 direction.

1881

### 1882 **4. Sustained Attention to Response Task (SART) (15 minutes)**

1883 SARTs are vigilance tasks that require that participants sustain their attention so as to minimise  
1884 distractibility. These tasks require that participants identify very infrequent targets with a key press  
1885 response, or to withhold key press responses to very infrequent targets.

1886

1887 The SART test will be carried out twice per participant assessment visit: both before and after the LP. This  
1888 will be to assess the effect of the LP and subsequent reduction in ICP on the result. Several studies show  
1889 that repeated tests do not show the effects of practice [70-72].

1890

### 1891 **5. Pattern-glare Test (5 minutes)**

1892 Participants are shown a series of single images containing black and white stripes and are asked to grade  
1893 their response to how uncomfortable the image is to look at.

1894

1895 **6. An IQ test (Raven's Standard Progressive Matrices – 15-30 minutes)** will be performed at the baseline  
1896 visit (or first available time point if not possible at baseline).

1897

1898 **7. An air pollution screening tool (Lifetime Exposure to Air Pollution Scale – 15 minutes)** will be  
1899 completed at the baseline visit (or first available time point if not possible at baseline). This will be  
1900 administered by the local research team and not completed by the participant.

1901

1902 **8. The matched obese control group (see section 12.1 below) will also undergo the National Institutes of**  
1903 **Health Toolbox Cognitive Battery.** This is a collection of cognitive instruments which test an array of  
1904 cognitive attributes including episodic memory, executive function, processing speed, multi-tasking and  
1905 planning. They will be delivered by an iPad application supervised by a member of the trial team and last  
1906 upto 45 minutes. There are no significant risks to the test and burden is limited to time only. This is a  
1907 validated collection of tests [73, 74].

### 1908 **11.8. Exploratory samples**

1909 Additional urine, blood, skin and fat samples will be taken from participants taking part in the exploratory  
1910 sub-studies. Additional serum samples will be taken at baseline, 12, 24 and 60 months. 24 hour urine  
1911 collections will also be taken at baseline and at 12 months. A 24 hour urine bottle will be provided to the  
1912 participant at pre-screening; at 12 months a research nurse at the centre will post the 24 hour urine bottle  
1913 to the participant prior to their assessment visit. Skin and fat samples will be taken at the time of surgery  
1914 from participants undergoing surgery at BHH.

1915

1916 The use and storage of these additional samples is detailed overleaf.

1917



1918 **Urine**

1919 A 24 hours urine collection will be collected from the participant.

1920

1921 **Venesection**

1922 The participant will undergo additional fasted blood sampling for exploratory analysis:

1923

1924 - Biomarker analysis including nitrotyrosine - 1 red tube of blood

1925 - Polymorphism studies - 1 purple tubes of blood.

1926 - Peripheral Blood Mononuclear Cells (PBMC) from whole blood - 2 purple tubes of blood.

1927 The total quantities of blood taken from participants giving these additional samples are summarised in  
1928 table 8, 9 and 10 below:

1929

1930 **Table 8: Blood samples and tubes (baseline, 12, 24 and 60 months)**

| Fasting metabolic evaluation              | PCOS                      | Exploratory analysis      | Polymorphism studies | Pre and Post meal samples | PBMC (baseline only) |
|-------------------------------------------|---------------------------|---------------------------|----------------------|---------------------------|----------------------|
| 1 purple tube, 1 grey tube, 1 yellow tube | 1 yellow tube, 1 red tube | 1 yellow tube, 1 red tube | 1 purple tube        | 6 purple GLP-1 tubes      | 2 purple tubes       |

1931

1932 **Table 9: Blood samples and quantities (baseline and 20 obese controls)**

| Yellow tubes (4mls) | Grey tubes (2mls) | Purple tubes (4mls) | Purple GLP-1 tubes (2mls) | Red tubes (6mls) | Volume collected in mls |
|---------------------|-------------------|---------------------|---------------------------|------------------|-------------------------|
| 3                   | 1                 | 4                   | 6                         | 2                | 54                      |

1933

1934 **Table 10: Blood samples and quantities (12, 24 and 60 months)**

| Yellow tubes (4mls) | Grey tubes (2mls) | Purple tubes (4mls) | Purple GLP-1 tubes (2mls) | Red tubes (6mls) | Volume collected in mls |
|---------------------|-------------------|---------------------|---------------------------|------------------|-------------------------|
| 3                   | 1                 | 3                   | 6                         | 2                | 50                      |

1935

1936 **Punch skin biopsy**

1937 A 3mm sample will be taken as described in 11.5 (baseline and 12 months) for analysis at the UHB  
1938 pathology department.

1939

1940 **Bariatric surgery samples**

1941 Samples will be taken under general anaesthetic at the time of surgery.

1942

1943 Skin: A 10mm ellipse of skin will be taken from the laparoscopic port site.

1944 Fat: A 10mm cubed sample of both subcutaneous and omental fat will be collected.

1945

1946 **11.9. Processing and storage of additional samples**

1947 The processing of the additional samples taken at the lead site is detailed below:

1948

1949 **Urine**

1950 The 24 hour urine collection will be measured for total volume and this will be recorded on the assessment  
1951 CRF. The sample will then be processed according to the laboratory manual and the aliquots stored at -  
1952 80°C, initially at the site before transfer to UoB for analysis of total corticosteroid metabolite levels,  
1953 [THF+alloTHF]/THE ratio, cortols/cortolones and total androgen metabolites.

1954

1955

1956

1957

1958

1959 **Blood**

- 1960
- 1961
- 1962
- 1963
- 1964
- 1965
- 1966
- 1967
- 1968
- 1969
- Biomarkers: 1 red tube will be processed according to the laboratory manual and the aliquots stored at -80°C, initially at the site before transfer to UoB for storage and biomarker analysis.
  - PBMCs: 2 purple tubes will be processed according to the laboratory manual and the aliquots stored at -80°C, initially at the site before transfer to UoB for storage. PBMC from this whole blood will be used to generate induced pluripotent stem cells for future study of CSF regulating tissues and IIH.
  - Polymorphism: 1 purple tube will be processed according to the laboratory manual and the aliquots stored at -80°C, initially at the site before transfer to UoB for storage and polymorphism analysis.

1970 **Skin samples**

1971 Punch biopsies of the skin from the shin will be transported to the UHB pathology department for analysis

1972 of the intraepidermal nerve fibre density. Skin biopsies may be used to generate induced pluripotent stem

1973 cells for future study of CSF regulating tissues and IIH.

1974

1975 **Bariatric surgery samples**

1976 Samples will be transported in RNALater immediately from BHH, and brought to the UoB and stored at the -

1977 80 degrees Celsius freezer at the UoB for batched analysis.

1978

1979 On these skin and fat samples, molecular biology techniques (e.g. polymerase chain reaction, western

1980 blotting, immunohistochemistry, microarray, enzyme activity assays and cell culture techniques) will be

1981 used to explore neuropeptides, growth factors, markers of hypoxia as well as the hormonal, vitamin and

1982 inflammatory pathways involved in IIH with the aim of improving our understanding of the pathogenesis of

1983 IIH.

1984

1985

1986

**12. EXPLORATORY SUB-STUDIES: ADDITIONAL RECRUITMENT GROUPS**

1987 Additional groups of participants will be recruited to facilitate the sub-studies described in Section 11.

1988

1989

**12.1. Matched obese control group sub-study**

1990 IIH is strikingly associated with obesity, 87.8 – 94% of patients with IIH being obese [75-77]. The incidence

1991 of IIH increases to between 19.3 and 21 per 100,000 in the obese population compared with 0.9 to 2.2 per

1992 100,000 in the general population [78-80].

1993

1994 The mechanism by which obesity causes IIH is debatable. OSA, a condition associated with obesity, leads to

1995 nocturnal hypercapnia, right heart failure and surges in intra-thoracic pressure which can elevate ICP

1996 particularly in the morning compared to the evening [81]. It has also been suggested that pressure effects

1997 of centrally distributed adiposity elevate intra-abdominal pressure which subsequently elevates intra-

1998 thoracic pressure, cerebral venous pressure, and finally ICP [82]. This theory does not explain why despite

1999 ubiquitous elevation of intra-abdominal pressure in obese patients [83, 84], only a small proportion of

2000 patients develop IIH.

2001

2002 Raised ICP is characteristic of IIH. However, the influence of obesity on ICP is not well established and the

2003 normal ICP in obese individuals is contentious. In the only study in this area, a weak, non-significant

2004 relationship between BMI and LP opening pressure was noted (although only 44 patients with a BMI

2005 >30kg/m<sup>2</sup> were evaluated) [84]. We aim to conduct LPs in a cohort of 20 obese patients with a BMI

2006 >35kg/m<sup>2</sup> who do not have IIH and consequently make this vital and novel observation of 'normal' ICP in

2007 morbidly obese individuals. This result will have profound implications to help establish the normal range of

2008 ICP in this patient population. Results will provide vital and much needed evidence to facilitate the

2009 diagnosing of conditions of raised ICP, such as IIH, in the obese. This is particularly important in cases of  
 2010 suspect IIH without papilloedema where there are no other indicators of raised ICP besides headache and  
 2011 diagnosis is very uncertain.

2012  
 2013 Finally, throughout this trial we are characterising the co-morbidities of IIH which extend beyond visual  
 2014 loss. We propose that there is significant metabolic comorbidity (impaired insulin sensitivity, Framingham  
 2015 Cardiovascular disease risk score, peripheral nerve function and 11 $\beta$  hydroxysteroid dehydrogenase  
 2016 function). Further, we predict that cognitive function may be impaired in patients with IIH. It has not been  
 2017 established, however, to what extent obesity in IIH influences these potentially associated co-morbidities.  
 2018 Through this sub-study we will be able to explore the influence of obesity on IIH.

2019  
 2020 We will assess at least 20 obese participants without IIH. The cohort will be matched for age, gender and  
 2021 BMI. These participants will undergo the same baseline visit as main trial participants with all exploratory  
 2022 sub-studies as described in Section 11 and then exit the study. They will not complete any health economics  
 2023 questionnaires. A subset of control patients will be recruited to undergo only visual assessments and  
 2024 medical examination/history; this subset will have a separate PIS describing the assessments they will  
 2025 undergo (PIS Control "Light"). The recruitment target will be 20 participants undergoing the full baseline  
 2026 assessment day.

2027

### 2028 **Objectives for matched obese control group sub-study**

#### 2029 **Primary objectives:**

- 2030
- To evaluate the baseline difference in ICP between IIH patients and a matched obese control cohort.
- 2031

#### 2032 **Secondary objectives:**

- 2033
- To evaluate the baseline difference in visual function, headache disability, sleep apnoea, cognitive testing and features of the metabolic syndrome (including peripheral neurophysiology and nerve fibre density) between IIH patients and a matched obese control cohort.
- 2034
- To evaluate the baseline difference in biomarker analysis between IIH patients and a matched obese control cohort.
- 2035
- 2036
- 2037

### 2038 **12.1.1 Eligibility for matched obese control group sub-study**

#### 2039 **Inclusion criteria:**

- 2040
1. Female.
  2. BMI >35kg/m<sup>2</sup>.
  3. Able to give informed consent.
  4. Aged between 18 and 55 years.
- 2041
- 2042
- 2043

#### 2044 **Exclusion criteria:**

- 2045
1. Pregnant.
  2. Inability to give informed consent e.g. due to cognitive impairment.
  3. Diagnosis of IIH.
- 2046
- 2047

2048 Trial participants will be matched to a closest matching control after recruitment has ended and interim  
 2049 analyses will be performed to monitor sub-study recruitment and inform remaining sub-study recruitment  
 2050 to ensure suitable matches are possible.

2051

#### 2052 **Recruitment to the matched obese control group sub-study**

2053 Potential participants to the matched obese control group sub-study will be identified and approached by  
 2054 research staff at primary care PIC sites, as well as in secondary care. Main trial participants will also be  
 2055 asked if they have friends or family who may meet the above eligibility criteria and be interested in taking  
 2056 part. Appropriate advertising to potential participants will be introduced. In some cases initial discussion

2057 with potential participants may take place by telephone. The clinician or research nurse will introduce the  
2058 sub-study to potential participants, and will provide the potential participant with sub-study specific PIS  
2059 and consent forms so that they can find out more about the sub-study before deciding whether or not to  
2060 participate.

2061

2062 They will be given time to consider participation in the sub-study and if they wish to take part they will be  
2063 offered an appointment at UHB for an assessment visit. If the participant gives written informed consent  
2064 before this full visit then they may be given a headache diary, 24 hour urine collection bottle and sleep  
2065 monitor to take home and bring back for this visit. If necessary, the headache diary may be completed  
2066 retrospectively on the day of the visit.

2067

2068 Participants in the matched obese control group sub-study will undergo the same screening/baseline  
2069 assessment day as main trial participants at UHB, and then leave the trial. A subset of control participants  
2070 will undergo only visual assessments and medical examination/history.

2071

2072 If any abnormalities are found which require follow up participants will be contacted by phone and if  
2073 necessary invited to return to discuss the findings. The researcher will use their clinical judgement to decide  
2074 if the participant needs to be referred to an appropriate service.

2075

2076

## 12.2. MRI Test Run sub-study

2077

2078 To validate the novel magnetic resonance scan sequences used in the MRI sub-study, at least 5 healthy  
2079 individuals will be scanned twice at least 2 weeks apart. The anonymised scans will be sent to the MRI  
2080 collaborator for evaluation to check the scanning procedures are suitable for use in the MRI sub-study.

2081

### Objectives for MRI Test Run sub-study

2082

Primary objective:

2083

- To validate the MRI test sequences being used in the MRI sub-study.

2084

### 12.2.1 Eligibility for MRI Test Run sub-study

2085

#### Inclusion criteria:

2086

1. Age between 18 and 65 years.

2087

2. Able to give informed consent.

2088

#### Exclusion criteria:

2089

1. Aged under 18 or over 65 years.

2090

2. Inability to give informed consent e.g. due to cognitive impairment.

2091

3. Pregnant.

2092

4. Pacemaker, metal implants, prosthetics, pins, plates, or metal fragments in body (including in the eye  
2093 but not including dental fillings).

2094

#### Recruitment to the MRI Test Run sub-study

2095

2096 The MRI test group participants will be recruited through the use of posters and fliers at UHB and UoB.  
2097 Potential participants will contact a named member of the research team through contact details available  
2098 on these posters and fliers. The researcher will introduce the MRI Test Run sub-study to them, and will  
2099 provide them with sub-study specific PIS and consent forms so that potential participants can find out more  
2100 about the sub-study before deciding whether or not to take part.

2101

2102

2103 They will then have the opportunity to discuss any questions they may have before an appointment for the  
2104 test scan at UHB is made. At this appointment, and before any trial scans are run, they will have the  
2105 opportunity to ask any questions they may have before being asked to give written informed consent.

2106

2107 Healthy controls for the MRI test run group will undergo a baseline MRI scan and a second scan at least 2  
2108 weeks later, and then leave the trial.

2107

2108 If any abnormalities are found which require follow up participants will be contacted by phone and if  
2109 necessary invited to return to discuss the findings. The researcher will use their clinical judgement to decide  
2110 if the participant needs to be referred to an appropriate service.

2111

### 2112 **12.3. Control Fat and Skin Sample sub-study**

2113 To gain the full benefit from the fat and skin samples taken from the main trial participants referred to  
2114 bariatric surgery, obese patients who have not been diagnosed with IIH will be approached at BHH for  
2115 similar quantities of subcutaneous and omental fat samples as well as skin samples as detailed in 11.8.  
2116 These participants' weight, age, height and sex will also be recorded as well as clinically relevant co-  
2117 morbidities. The purpose of these samples will be to optimise the experiments before performing them on  
2118 the main trial participants' samples.

2119

#### 2120 **Objectives for Control Fat and Skin Sample sub-study**

##### 2121 **Primary objective:**

- 2122 • To obtain subcutaneous and omental fat samples and skin samples to use as control samples.

2123

#### 2123 **12.3.1 Eligibility for Control Fat and Skin Sample sub-study**

##### 2124 **Inclusion criteria:**

- 2125 1. Age between 18 and 65 years.
- 2126 2. Able to give informed consent.

2127

##### 2127 **Exclusion criteria:**

- 2128 1. Aged under 18 or over 65 years.
- 2129 2. Inability to give informed consent e.g. due to cognitive impairment.
- 2130 3. Diagnosis of IIH.

2131

#### 2131 **Recruitment to the Control Fat and Skin Sample sub-study**

2132 Participants in this sub-study will be recruited at the lead surgery site. Suitable potential participants will be  
2133 approached by the research team at this site. The researcher will introduce the sub-study to them, and will  
2134 provide them with sub-study specific PIS and consent form so that potential participants can find out more  
2135 about the sub-study before deciding whether or not to take part.

2136

2137 They will then have the opportunity to discuss any questions before their scheduled procedure, and will be  
2138 asked to give written informed consent.

2139

2140

2141

## 2141 **13. DATA ACCESS AND QUALITY ASSURANCE**

2142

### 2142 **13.1. Monitoring and Audit**

2143 The investigators and institutions will permit trial-related monitoring, audits and REC review, providing  
2144 direct access to source data/documents. Trial participants are informed of this during the informed consent  
2145 discussion and will consent to provide access to their medical notes. Monitoring of this trial will be to  
2146 ensure compliance with GCP.

2147

2148 A risk proportionate approach to the initiation, management and monitoring of the trial will be adopted  
2149 and outlined in the trial-specific risk assessment.

2150

### 2151 **13.2. Site Set-up and Initiation**

2152 All PIs will be asked to sign a Site Signature and Delegation log, the Protocol PI signature page, and to  
2153 supply a current CV and GCP certificate to BCTU. All members of the site research team are required to  
2154 sign the Site Signature and Delegation Log, which details which tasks have been delegated to them by the  
2155 PI.

2156

2157 Prior to commencing recruitment, each recruiting site will undergo a process of initiation, either a meeting  
2158 or a teleconference, which key members of the site research team are required to attend, covering aspects  
2159 of the trial design, protocol procedures, adverse event reporting, collection and reporting of data and  
2160 record keeping. Sites will be provided with an Investigator Site File containing essential documentation,  
2161 instructions, and other documentation required for the conduct of the trial. The trial office must be  
2162 informed immediately of any change in the site research team.

2163

### 2164 **13.3. Central Monitoring**

2165 Trials staff will be in regular contact with the site research team to check on progress and address any  
2166 queries that they may have. Trials staff will check incoming ICFs and CRFs for compliance with the protocol,  
2167 data consistency, missing data and timing. Sites will be sent DCFs requesting missing data or clarification of  
2168 inconsistencies or discrepancies.

2169

2170 On-site monitoring visits may be triggered, for example by poor CRF return, poor data quality, low SAE  
2171 reporting rates, excessive number of participant withdrawals or deviations. If a monitoring visit is required  
2172 the Trials team will contact the site to arrange a date for the proposed visit and will provide the site with  
2173 written confirmation. Investigators will allow the trial staff access to source documents as requested.

2174

### 2175 **13.4. Notification of Serious Breaches**

2176 The sponsor is responsible for notifying the REC of any serious breach of the conditions and principles of  
2177 GCP in connection with that trial or the protocol relating to that trial. Sites are therefore requested to  
2178 notify the trial office of any suspected trial-related serious breach of GCP and/or the trial protocol. Where  
2179 the trial office is investigating whether or not a serious breach has occurred sites are also requested to  
2180 cooperate with the trial office in providing sufficient information to report the breach to the REC where  
2181 required and in undertaking any corrective and/or preventive action.

2182

2183 Sites may be suspended from further recruitment in the event of serious and persistent non-compliance  
2184 with the protocol and/or GCP, and/or poor recruitment. Any major problems identified during monitoring  
2185 may be reported to the TMG, TSC, and REC. This includes reporting serious breaches of GCP and/or the trial  
2186 protocol to the REC. A copy is sent to the University of Birmingham Clinical Research Compliance Team at  
2187 the time of reporting to the REC.

2188

### 2189 **13.5. Independent Trial Steering Committee**

2190 The TSC provides independent supervision for the trial, providing advice to the Chief and Co-Investigators  
2191 and the Sponsor on all aspects of the trial and affording protection for participants by ensuring the trial is  
2192 conducted according to the principles of GCP in Clinical Trials.

2193

2194 If the Chief and Co-Investigators are unable to resolve any concern satisfactorily, PIs and all others  
2195 associated with the trial may write through the Trial Office to the chairman of the TSC, drawing attention to  
2196 any concerns they may have about the possibility of particular side-effects, or of particular categories of  
2197 participant requiring special study, or about any other matters thought relevant.

2198

2199 The TSC will comprise an independent chairperson, one other independent specialist, one independent  
2200 statistician, one independent patient and public involvement representative, and the CI. This group will  
2201 meet at the beginning of the trial and thereafter up to six monthly depending on progress.

2202

### 2203 **13.6. Data Monitoring Committee: determining when clear answers have emerged**

2204 If one treatment arm is more effective with respect to the primary endpoints than the other, then this may  
2205 become apparent before the target recruitment has been reached. Alternatively, new evidence might  
2206 emerge from other sources that one of the treatment arms is definitely effective. To protect against this,  
2207 during the period of recruitment to the trial, interim analyses of major endpoints will be supplied, in strict  
2208 confidence, to an independent DMC along with updates on results of other related studies, and any other

2209 analyses that the DMC may request. The DMC will advise the chair of the TSC if, in their view, either of the  
 2210 randomised comparisons in the trial have provided both (a) “proof beyond reasonable doubt”<sup>††</sup> that for all,  
 2211 or for some, types of participant one particular treatment is definitely indicated or definitely  
 2212 contraindicated in terms of a net difference in the major endpoints, and (b) evidence that might reasonably  
 2213 be expected to influence the patient management of many clinicians who are already aware of the other  
 2214 main trial results. The TSC can then decide whether to close or modify any part of the trial. Unless this  
 2215 happens, however, the TMG, TSC, the investigators and all of the central administrative staff (except the  
 2216 statisticians who supply the confidential analyses) will remain unaware of the interim results.

2217  
 2218

## 2219 **14. ORGANISATION AND RESPONSIBILITIES**

2220 To ensure the smooth running of the trial and to minimise the overall procedural workload, it is proposed  
 2221 that each participating centre should designate individuals who will be chiefly responsible for local co-  
 2222 ordination of clinical and administrative aspects of the trial.

2223

2224 All Investigators are responsible for ensuring that any research undertaken follows the agreed protocol, for  
 2225 helping care professionals to ensure that participants receive appropriate care while involved in research,  
 2226 for protecting the integrity and confidentiality of clinical and other records and data generated by the  
 2227 research, and for reporting any failures in these respects, adverse reactions and other events or suspected  
 2228 misconduct through the appropriate systems.

2229

### 2230 **14.1. Principal Investigator at each centre**

2231 The responsibilities of the local Principal Investigator are for the conduct of research at their centre and to  
 2232 ensure that all medical and nursing staff involved in the care of the participant are well informed about the  
 2233 trial and trained in trial procedures, including obtaining informed consent. The local Principal Investigator  
 2234 should liaise with the Trial Coordinator on logistic and administrative matters connected with the trial.

2235

### 2236 **14.2. Nursing Co-ordinator at each centre**

2237 Each participating centre should designate one nurse as local Nursing Coordinator. This person will be  
 2238 responsible for ensuring that all eligible patients are considered for the trial, that potential participants are  
 2239 provided with PIS, and have an opportunity to discuss the trial if required. The nurse may be responsible for  
 2240 collecting the baseline participant data and for administering the follow-up evaluations.

2241

### 2242 **14.3. The Neuroscience Trials Office**

2243 The trial office at UoB is responsible for providing all trial materials, including the trial folders containing  
 2244 printed materials. These will be supplied to each collaborating centre, after relevant ethics committee and  
 2245 R&D approval has been obtained. Additional supplies of any printed material can be obtained on request.  
 2246 The trial office is responsible for collection and checking of data (including reports of SAEs thought to be  
 2247 due to trial treatment). The trial office will help resolve any local problems that may be encountered in trial  
 2248 participation.

2249

### 2250 **14.4. Research Governance**

2251 The conduct of the trial will be in accordance with the Medical Research Council Guidelines for Good  
 2252 Clinical Practice 1998 and the Research Governance Framework for Health and Social Care.  
 2253 Participants/carers will be involved in the ethics process, ensuring that all PIS and consent forms are fit for  
 2254 purpose. The trial will adhere to the principles of GCP and the Declaration of Helsinki (2008 / 1996).

---

†† Appropriate criteria of proof beyond reasonable doubt cannot be specified precisely, but a difference of at least  $p < 0.001$  (similar to Haybittle-Peto boundary) in an interim analysis of a major endpoint may be needed to justify halting, or modifying, the study prematurely. If this criterion were to be adopted, it would have the practical advantage that the exact number of interim analyses would be of little importance, so no fixed schedule is proposed.

2255

2256 All centres will be required to sign an Investigator's Agreement, detailing their commitment to accrual,  
2257 compliance, GCP, confidentiality and publication. Deviations from the agreement will be monitored and the  
2258 TSC will decide whether any action needs to be taken, e.g. withdrawal of funding, suspension of centre.

2259

2260 The trial office will ensure researchers not employed by an NHS organisation hold an NHS honorary  
2261 contract for the relevant organisation.

2262

#### 2263 **14.5. Ethical and Trust Management**

2264 The Trial has a favourable ethical opinion from West Midlands – The Black Country Research Ethics  
2265 Committee (REC), determining that the trial design respects the rights, safety and wellbeing of the  
2266 participants. The Trust Research and Development Office need to assess the "locality issues" relating to  
2267 their population, the investigators, the facilities and resources. The trial office is able to help the local  
2268 Principal Investigator in the process of the site specific assessment and NHS permission by completing as  
2269 much of the standard IRAS form as possible. The local Principal Investigator will be responsible for liaison  
2270 with the Trust and/or Local Research Network with respect to locality issues and obtaining the necessary  
2271 signatures at their Trust.

2272

2273 As soon as REC and Trust/Network approval has been obtained, the trial office will send a folder containing  
2274 all trial materials to the local Principal Investigator. Entry of participants into the trial can then begin.

2275

#### 2276 **14.6. Funding and Cost implications**

2277 The research costs of the trial are funded by a clinical fellowship from the NIHR awarded to the CI. A  
2278 subvention for the costs of surgery and Weight Watchers will be payable from this. Participant travel (up to  
2279 £120 total) will be paid from this, as will £125 offered as a compensation for loss of time and earnings at  
2280 the 12, 24 and 60 month visits. Participants in the matched obese control group will be offered a  
2281 compensation for loss of time and earnings of £200 for a full baseline assessment day. Their reasonable  
2282 travel expenses for this visit will also be refunded from this clinical fellowship. MRI Test Run and Sample  
2283 Control participants will not be offered any payment or travel expenses. Further help with participant travel  
2284 expenses has been kindly donated by the patient charity IIH UK.

2285

2286 The trial has been adopted onto the NIHR portfolio and so the 'NHS service support' costs for this trial will  
2287 be met by CLRN.

2288

2289 Additional costs associated with the trial, e.g. gaining consent, baseline tests, for nurses to explain the  
2290 questionnaires to participants, etc., are estimated in the standard IRAS form. These costs should be met by  
2291 accessing the Trust/Network's support budget.

2292

#### 2293 **14.7. Indemnity**

2294 There are no special arrangements for compensation for non-negligent harm suffered by participants as a  
2295 result of participating in the trial. The trial is not an industry-sponsored trial and so ABPI/ABHI guidelines on  
2296 indemnity do not apply. The normal NHS indemnity liability arrangements for research detailed in  
2297 HSG96(48) will operate in this case.

2298

2299 However, it should be stressed that in terms of negligent liability, NHS Trust hospitals have a duty of care to  
2300 a patient being treated within their hospital, whether or not that patient is participating in a clinical trial.  
2301 Apart from defective products, legal liability does not arise where there is non-negligent harm. NHS Trusts  
2302 may not offer advance indemnities or take out commercial insurance for non-negligent harm.

2303

#### 2304 **14.8. Publication**

2305 Results of this trial will be submitted for publication in a peer-reviewed journal. The manuscript will be  
2306 prepared by the IIH:WT trial team and authors will include the CI, collaborators, co-investigators, and BCTU



2307 staff (as long as all listed had reasonable contributions). Results will be disseminated to participants by  
 2308 using a participant newsletter, through patient charities, and on the trial website.  
 2309

## 2310 15. PROJECT TIMETABLE AND MILESTONES

2311 Six months have been set aside to recruit and train staff, to identify patients/carers for the involvement  
 2312 group, to gain NRES, SSA and R & D department approvals and to set up trial procedures. With 45 months  
 2313 for recruitment, 60 months to follow the last participant, and 6 months for data analysis, the trial will take  
 2314 117 months to complete as shown on table 11 overleaf. As the primary endpoint is at 12 months, the trial  
 2315 will take 69 months to reach the publication of its main results.  
 2316

2317

2318 **Table 11: IIH:WT timetable**

2319

| Time                  | Action                                                                                                                              |
|-----------------------|-------------------------------------------------------------------------------------------------------------------------------------|
| August 2013           | Trial officially commences                                                                                                          |
| November 2013 onwards | Applications for SSA and R&D approval submitted                                                                                     |
| February 2014         | Recruitment commences                                                                                                               |
| October 2017          | Main trial recruitment completed                                                                                                    |
| October 2018          | Control participant recruitment completed<br>Last participant reaches primary endpoint<br>Data analysis commences<br>Report written |
| April 2019            | Paper submitted for publication                                                                                                     |
| October 2022          | Last participant completes 60 month follow up<br>Data analysis commences                                                            |
| April 2023            | Long-term follow up paper submitted for publication                                                                                 |

2320

2316. **APPENDIX A: FRISÉN GRADING**

2322 Modified Frisén Scale for Grading Papilledema

2323 Grade 1 - C-Shaped halo with a temporal gap

2324 Grade 2 - The halo becomes circumferential

2325 Grade 3 - Loss of major vessels as they *leave*  
2326 the disc

2327 Grade 4 - Loss of major vessels *on the disc*

2328 Grade 5 - Criteria of Grade IV + partial or total  
2329 obscuration of *all* vessels on the disc

2330 from CJ Scott et al., 2010 [1]

2331

2332

2333

2334

2335

2336

2337

2338

2339

2340

2341

2342

2343

2344

2345

2346

2347

2348

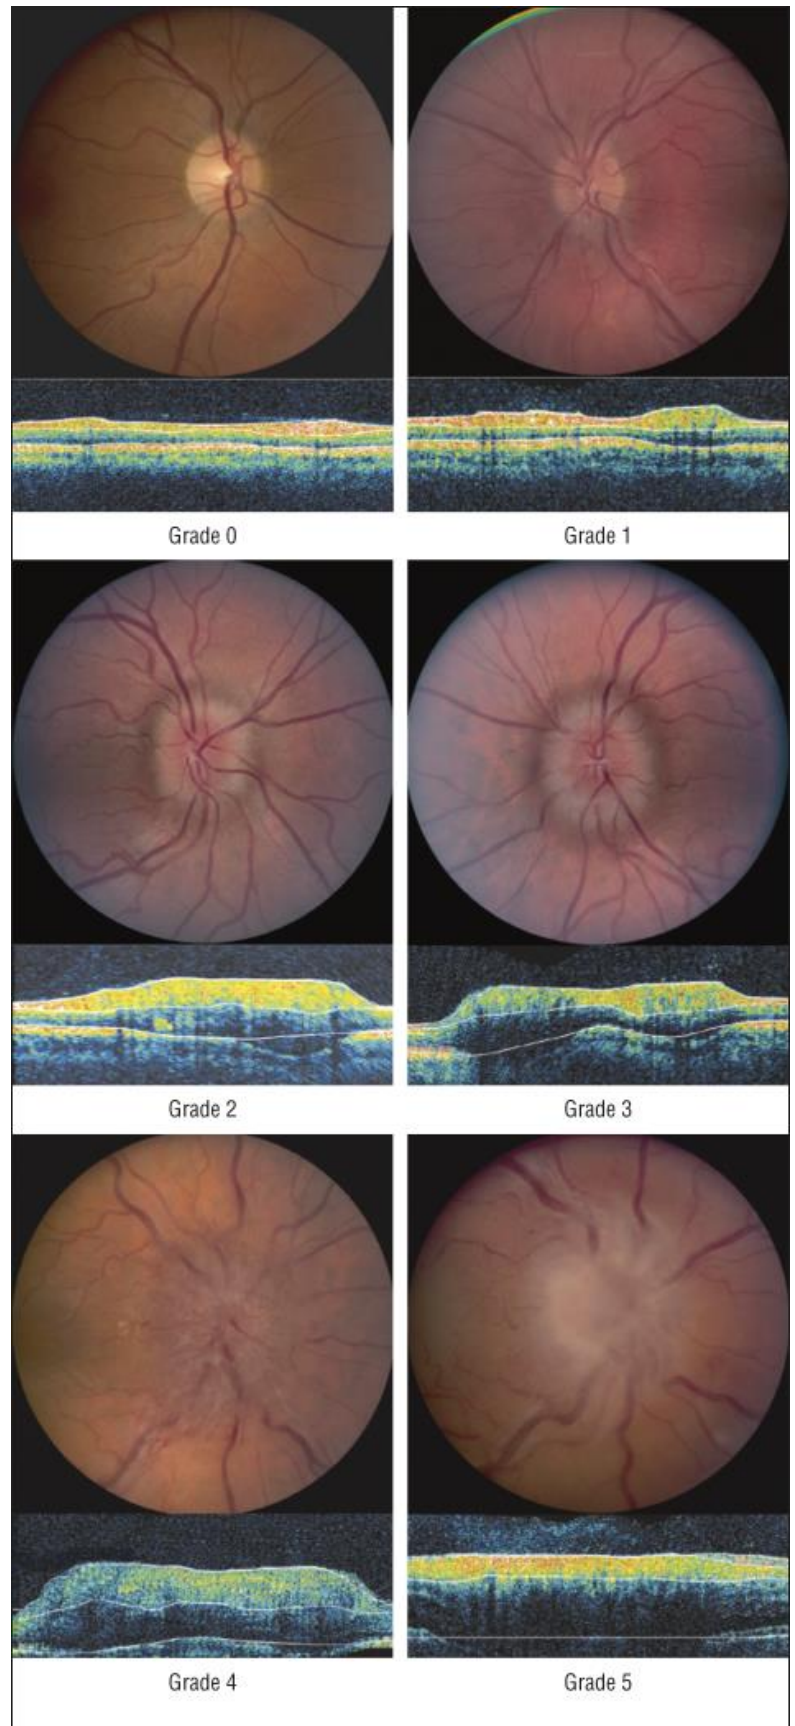

2349

**17. REFERENCES**

- 2350 1. Scott, C.J., et al., Diagnosis and grading of papilledema in patients with raised intracranial pressure  
2351 using optical coherence tomography vs clinical expert assessment using a clinical staging scale. *Arch.*  
2352 *Ophthalmol*, 2010. **128**(6): p. 705-711.
- 2353 2. Organization, W.H. *Global Database on Body Mass Index*. 2013 2013 [cited 2013 9/19/13 AD];  
2354 Available from: <http://apps.who.int/bmi/index.jsp>.
- 2355 3. Lueck, C. and G. McIlwaine, *Interventions for idiopathic intracranial hypertension*. *Cochrane*  
2356 *Database Syst Rev*, 2005(3): p. CD003434.
- 2357 4. Ball, A.K., et al., A randomised controlled trial of treatment for idiopathic intracranial hypertension.  
2358 *J Neurol*, 2011. **258**(5): p. 874-81.
- 2359 5. Celebisoy, N., et al., Treatment of idiopathic intracranial hypertension: topiramate vs  
2360 acetazolamide, an open-label study. *Acta Neurol Scand*, 2007. **116**(5): p. 322-327.
- 2361 6. Curry, W.T., W.E. Butler, and F.G. Barker, Rapidly rising incidence of cerebrospinal fluid shunting  
2362 procedures for idiopathic intracranial hypertension in the United States, 1988-2002. *Neurosurgery*, 2005.  
2363 **57**(1): p. 97-107.
- 2364 7. Sinclair, A.J., et al., Is cerebrospinal fluid shunting in idiopathic intracranial hypertension  
2365 worthwhile? A 10-year review. *Cephalalgia*, 2011. **31**(16): p. 1627-1633.
- 2366 8. Abubaker, K., et al., Idiopathic intracranial hypertension: lumboperitoneal shunts versus  
2367 ventriculoperitoneal shunts--case series and literature review. *Br J Neurosurg*, 2011. **25**(1): p. 94-9.
- 2368 9. Newborg, B., *Pseudotumor Cerebri Treated by Rice-Reduction Diet*. *Arch Intern Med*, 1974. **133**(5):  
2369 p. 802-807.
- 2370 10. Sinclair, A.J., et al., Low energy diet and intracranial pressure in women with idiopathic intracranial  
2371 hypertension: prospective cohort study. *BMJ*, 2010. **341**: p. c2701.
- 2372 11. Fridley, J., et al., Bariatric surgery for the treatment of idiopathic intracranial hypertension. *J*  
2373 *Neurosurg*, 2011. **114**(1): p. 34-39.
- 2374 12. Colquitt, J.L., et al., *Surgery for obesity*. *Cochrane Database Syst Rev*, 2009(2): p. CD003641.
- 2375 13. Camastra, S., et al., Early and longer term effects of gastric bypass surgery on tissue-specific insulin  
2376 sensitivity and beta cell function in morbidly obese patients with and without type 2 diabetes. *Diabetologia*,  
2377 2011. **54**(8): p. 2093-2102.
- 2378 14. Dixon, J.B., et al., Adjustable gastric banding and conventional therapy for type 2 diabetes - A  
2379 randomized controlled trial. *JAMA*, 2008. **299**(3): p. 316-323.
- 2380 15. Singhal, R., et al., Medium-term outcomes of patients with insulin-dependent diabetes after  
2381 laparoscopic adjustable gastric banding. *Surg Obes Relat Dis*, 2013. **9**(1): p. 42-47.
- 2382 16. Singhal, R., et al., Metabolic Outcomes of Obese Diabetic Patients Following Laparoscopic  
2383 Adjustable Gastric Banding. *Obes Surg*, 2008. **18**(11): p. 1400-1405.
- 2384 17. Schauer, D.P., et al., Decision Modeling to Estimate the Impact of Gastric Bypass Surgery on Life  
2385 Expectancy for the Treatment of Morbid Obesity. *Arch Surg*, 2010. **145**(1): p. 57-62.
- 2386 18. Picot, J., et al., The clinical effectiveness and cost-effectiveness of bariatric (weight loss) surgery for  
2387 obesity: a systematic review and economic evaluation. *Health Technol Assess*, 2009. **13**(41): p. 1-+.
- 2388 19. Hutter, M.M., et al., First report from the American College of Surgeons Bariatric Surgery Center  
2389 Network: laparoscopic sleeve gastrectomy has morbidity and effectiveness positioned between the band  
2390 and the bypass. *Ann Surg*, 2011. **254**(3): p. 410-420.
- 2391 20. Longitudinal Assessment of Bariatric Surgery, C., et al., *Perioperative safety in the longitudinal*  
2392 *assessment of bariatric surgery*. *N Engl J Med*, 2009. **361**(5): p. 445-54.
- 2393 21. Excellence, N.I.f.H.a.C. *Obesity: the prevention, identification, assessment and management of*  
2394 *overweight and obesity in adults and children; CG43*. 2006 2006 [cited 2013 9/18/2013]; Available from:  
2395 <http://www.nice.org.uk/CG43>.
- 2396 22. Ko, M., et al., Weight gain and recurrence in idiopathic intracranial hypertension A case-control  
2397 study. *Neurology*, 2011. **76**(18): p. 1564-1567.
- 2398 23. Middleton, K.M., S.M. Patidar, and M.G. Perri, The impact of extended care on the long-term  
2399 maintenance of weight loss: a systematic review and meta-analysis. *Obes Rev*, 2012. **13**(6): p. 509-17.
- 2400 24. Astrup, A., et al., Effects of liraglutide in the treatment of obesity: a randomised, double-blind,  
2401 placebo-controlled study. *Lancet*, 2009. **374**(9701): p. 1606-16.

- 2402 25. Li, Z.P., et al., *Meta-analysis: Pharmacologic treatment of obesity*. *Ann Intern Med*, 2005. **142**(7): p.  
2403 532-546.
- 2404 26. Chapman, A.E., et al., Laparoscopic adjustable gastric banding in the treatment of obesity: A  
2405 systematic literature review. *Surgery*, 2004. **135**(3): p. 326-351.
- 2406 27. O'Brien, P.E., et al., Systematic review of medium-term weight loss after bariatric operations. *Obes*  
2407 *Surg*, 2006. **16**(8): p. 1032-1040.
- 2408 28. Jolly, K., et al., Comparison of range of commercial or primary care led weight reduction  
2409 programmes with minimal intervention control for weight loss in obesity: Lighten Up randomised  
2410 controlled trial. *BMJ*, 2011. **343**: p. d6500.
- 2411 29. Heshka, S., et al., Weight loss with self-help compared with a structured commercial program - A  
2412 randomized trial. *JAMA*, 2003. **289**(14): p. 1792-1798.
- 2413 30. Jebb, S.A., et al., Primary care referral to a commercial provider for weight loss treatment versus  
2414 standard care: a randomised controlled trial. *Lancet*, 2011. **378**(9801): p. 1485-1492.
- 2415 31. Truby, H., et al., Randomised controlled trial of four commercial weight loss programmes in the UK:  
2416 initial findings from the BBC "diet trials". *BMJ*, 2006. **332**(7553): p. 1309-1311.
- 2417 32. Friedman, D.I. and D.M. Jacobson, *Diagnostic criteria for idiopathic intracranial hypertension*.  
2418 *Neurology*, 2002. **59**(10): p. 1492-5.
- 2419 33. Sinclair, A.J., et al., Rating papilloedema: an evaluation of the Frisen classification in idiopathic  
2420 intracranial hypertension. *J Neurol Sci*, 2012. **259**(7): p. 1406-1412.
- 2421 34. Chung, F., et al., High STOP-Bang score indicates a high probability of obstructive sleep apnoea. *Br*.  
2422 *J. Anaesth*, 2012. **108**(5): p. 768-775.
- 2423 35. Chung, F., et al., STOP questionnaire: a tool to screen patients for obstructive sleep apnea.  
2424 *Anesthesiology*, 2008. **108**(5): p. 812-821.
- 2425 36. Asensio Sanchez, V.M., J. Merino Angulo, and A. Narros Gimenez, *Apnea syndrome: risk factors for*  
2426 *pseudotumor cerebri*. *An Med Interna*, 2004. **21**(10): p. 520-520.
- 2427 37. Shiba, T., et al., Nocturnal Intermittent Serious Hypoxia and Reoxygenation in Proliferative Diabetic  
2428 Retinopathy Cases. *Am J Ophthalmol*, 2010. **149**(6): p. 959-963.
- 2429 38. Mojon, D.S., et al., Association between sleep apnea syndrome and nonarteritic anterior ischemic  
2430 optic neuropathy. *Archives of Ophthalmology*, 2002. **120**(5): p. 601-605.
- 2431 39. Ruehland, W.R., et al., The New AASM Criteria for Scoring Hypopneas: Impact on the Apnea  
2432 Hypopnea Index. *Sleep*, 2009. **32**(2): p. 150-157.
- 2433 40. Smith, A.G., K. Rose, and J.R. Singleton, *Idiopathic neuropathy patients are at high risk for metabolic*  
2434 *syndrome*. *J Neurol Sci*, 2008. **273**(1-2): p. 25-28.
- 2435 41. Hoffman-Snyder, C., et al., Value of the oral glucose tolerance test in the evaluation of chronic  
2436 idiopathic axonal polyneuropathy. *Arch Neurol*, 2006. **63**(8): p. 1075-1079.
- 2437 42. Hughes, R.A.C., et al., A controlled investigation of the cause of chronic idiopathic axonal  
2438 polyneuropathy. *Brain*, 2004. **127**(Pt 8): p. 1723-1730.
- 2439 43. Smith, A.G., et al., *Lifestyle intervention for pre-diabetic neuropathy*. *Diabetes Care*, 2006. **29**(6): p.  
2440 1294-1299.
- 2441 44. Singleton, J.R., et al., The Utah Early Neuropathy Scale: a sensitive clinical scale for early sensory  
2442 predominant neuropathy. *J Peripher Nerv Syst*, 2008. **13**(3): p. 218-227.
- 2443 45. Rajabally, Y.A., S. Beri, and J. Bankart, Electrophysiological markers of large fibre sensory  
2444 neuropathy: a study of sensory and motor conduction parameters. *Eur J Neurol*, 2009. **16**(9): p. 1053-1059.
- 2445 46. Devigili, G., et al., The diagnostic criteria for small fibre neuropathy: from symptoms to  
2446 neuropathology. *Brain*, 2008. **131**(Pt 7): p. 1912-1925.
- 2447 47. LoPinto, C., W.B. Young, and A. Ashkenazi, *Comparison of dynamic (brush) and static (pressure)*  
2448 *mechanical allodynia in migraine*. *Cephalalgia*, 2006. **26**(7): p. 852-856.
- 2449 48. Alperin, N., et al., MR-intracranial pressure (ICP): A method to measure intracranial elastance and  
2450 pressure noninvasively by means of MR imaging: Baboon and human study. *Radiology*, 2000. **217**(3): p.  
2451 877-885.
- 2452 49. Alperin, N., et al., MRI evidence of impaired CSF homeostasis in obesity-associated idiopathic  
2453 intracranial hypertension. *AJNR Am J Neuroradiol*, 2013. **34**(1): p. 29-34.

- 2454 50. Alperin, N., A. Sivaramakrishnan, and T. Lichtor, Magnetic resonance imaging-based measurements  
2455 of cerebrospinal fluid and blood flow as indicators of intracranial compliance in patients with Chiari  
2456 malformation. *Journal of Neurosurgery*, 2005. **103**(1): p. 46-52.
- 2457 51. Glick, R.P., et al., Early experience from the application of a noninvasive magnetic resonance  
2458 imaging-based measurement of intracranial pressure in hydrocephalus (and discussion 1060-1061).  
2459 *Neurosurgery*, 2006. **59**(5): p. 1052-1060.
- 2460 52. Kelly, L.P., et al., Does bilateral transverse cerebral venous sinus stenosis exist in patients without  
2461 increased intracranial pressure? *Clinical Neurology and Neurosurgery*, 2013. **115**(8): p. 1215-1219.
- 2462 53. Ridha, M.A., et al., Magnetic Resonance Imaging Findings of Elevated Intracranial Pressure in  
2463 Cerebral Venous Thrombosis Versus Idiopathic Intracranial Hypertension with Transverse Sinus Stenosis.  
2464 *Neuro-Ophthalmology*, 2013. **37**(1): p. 1-6.
- 2465 54. Hoffmann, J., et al., Morphometric and volumetric MRI changes in idiopathic intracranial  
2466 hypertension. *Cephalalgia*, 2013. **33**(13): p. 1075-1084.
- 2467 55. Rohr, A. and J. Bindeballe, The entire dural sinus tree is compressed in patients with idiopathic  
2468 hypertension: a longitudinal, volumetric magnetic resonance imaging study. *Neuroradiology*, 2011.
- 2469 56. Kharkar, S., et al., Cognitive Impairment in patients with Pseudotumor Cerebri Syndrome. *Behav*  
2470 *Neurol*, 2011. **24**(2): p. 143-148.
- 2471 57. Kaplan, C.P., M.E. Miner, and J.M. McGregor, *Pseudotumour cerebri: Risk for cognitive impairment?*  
2472 *Brain Inj*, 1997. **11**(4): p. 293-303.
- 2473 58. Sorensen, P.S., A.M. Thomsen, and F. Gjerris, *Persistent Disturbances of Cognitive Functions in*  
2474 *Patients with Pseudotumor Cerebri*. *Acta Neurol Scand*, 1986. **73**(3): p. 264-268.
- 2475 59. Friedman, D.I. and E.A. Rausch, Headache, diagnoses in patients with treated idiopathic intracranial  
2476 hypertension. *Neurology*, 2002. **58**(10): p. 1551-1553.
- 2477 60. Mulder, E.J.C.M., et al., *Interictal and postictal cognitive changes in migraine*. *Cephalalgia*, 1999.  
2478 **19**(6): p. 557-565.
- 2479 61. Lacy, M., et al., Intellectual functioning in children with early shunted posthemorrhagic  
2480 hydrocephalus. *Pediatr Neurosurg*, 2008. **44**(5): p. 376-381.
- 2481 62. Mataro, M., et al., Neuropsychological findings in congenital and acquired childhood  
2482 hydrocephalus. *Neuropsychol Rev*, 2001. **11**(4): p. 169-178.
- 2483 63. Kazui, H., et al., Predictors of the disappearance of triad symptoms in patients with idiopathic  
2484 normal pressure hydrocephalus after shunt surgery. *J Neurol Sci*, 2013. **328**(1-2): p. 64-69.
- 2485 64. Malhi, G.S., et al., Neuropsychological deficits and functional impairment in bipolar depression,  
2486 hypomania and euthymia. *Bipolar Disord*, 2007. **9**(1-2): p. 114-125.
- 2487 65. Martinez-Aran, A., et al., Cognitive function across manic or hypomanic, depressed, and euthymic  
2488 states in bipolar disorder. *Am J Psychiatry*, 2004. **161**(2): p. 262-270.
- 2489 66. Bressler, J., et al., Fat mass and obesity gene and cognitive decline The Atherosclerosis Risk in  
2490 Communities Study. *Neurology*, 2013. **80**(1): p. 92-99.
- 2491 67. Kielb, S.A., et al., Cognition in Obstructive Sleep Apnea-Hypopnea Syndrome (OSAS): Current  
2492 Clinical Knowledge and the Impact of Treatment. *Neuromolecular Med*, 2012. **14**(3): p. 180-193.
- 2493 68. Chapman, K., M. Holmes, and J. Seckl, 11 Beta-Hydroxysteroid Dehydrogenases: Intracellular Gate-  
2494 Keepers of Tissue Glucocorticoid Action. *Physiological Reviews*, 2013. **93**(3): p. 1139-1206.
- 2495 69. Sinclair, A.J., et al., Cerebrospinal Fluid Corticosteroid Levels and Cortisol Metabolism in Patients  
2496 with Idiopathic Intracranial Hypertension: A Link between 11 beta-HSD1 and Intracranial Pressure  
2497 Regulation? *Journal of Clinical Endocrinology & Metabolism*, 2010. **95**(12): p. 5348-5356.
- 2498 70. Manly, T., et al., Coffee in the cornflakes: time-of-day as a modulator of executive response control.  
2499 *Neuropsychologia*, 2002. **40**(1): p. 1-6.
- 2500 71. Manly, T., et al., The absent mind: further investigations of sustained attention to response.  
2501 *Neuropsychologia*, 1999. **37**(6): p. 661-670.
- 2502 72. Robertson, I.H., et al., 'Oops!': Performance correlates of everyday attentional failures in traumatic  
2503 brain injured and normal subjects. *Neuropsychologia*, 1997. **35**(6): p. 747-758.
- 2504 73. Heaton, R.K., et al., Reliability and validity of composite scores from the NIH Toolbox Cognition  
2505 Battery in adults. *J Int Neuropsychol Soc*, 2014. **20**(6): p. 588-98.

- 2506 74. Weintraub, S., et al., *Cognition assessment using the NIH Toolbox*. *Neurology*, 2013. **80**(11 Suppl 3):  
2507 p. S54-64.
- 2508 75. Galvin, J.A. and G.P. Van Stavern, Clinical characterization of idiopathic intracranial hypertension at  
2509 the Detroit Medical Center. *J Neurol Sci*, 2004. **223**(2): p. 157-160.
- 2510 76. Giuseffi, V., et al., Symptoms and Disease Associations in Idiopathic Intracranial Hypertension  
2511 (Pseudotumor Cerebri) - A Case-Control Study. *Neurology*, 1991. **41**(2): p. 239-244.
- 2512 77. Wall, M. and D. George, Idiopathic Intracranial Hypertension - A Prospective-Study of 50 Patients.  
2513 *Brain*, 1991. **114**: p. 155-180.
- 2514 78. Durcan, F.J., J.J. Corbett, and M. Wall, *The Incidence of Pseudotumor Cerebri - Population Studies in*  
2515 *Iowa and Louisiana*. *Arch Neurol*, 1988. **45**(8): p. 875-877.
- 2516 79. Ireland, B., J.J. Corbett, and R.B. Wallace, The Search for Causes of Idiopathic Intracranial  
2517 Hypertension - A Preliminary Case-Control Study. *Arch Neurol*, 1990. **47**(3): p. 315-320.
- 2518 80. Radhakrishnan, K., et al., Epidemiology of Idiopathic Intracranial Hypertension - A Prospective and  
2519 Case-Control Study. *J Neurol Sci*, 1993. **116**(1): p. 18-28.
- 2520 81. Jennum, P. and S.E. Borgesen, *Intracranial-Pressure and Obstructive Sleep-Apnea*. *Chest*, 1989.  
2521 **95**(2): p. 279-283.
- 2522 82. Sugerman, H., et al., Effects of Surgically Induced Weight-Loss on Idiopathic Intracranial  
2523 Hypertension in Morbid-Obesity. *Neurology*, 1995. **45**(9): p. 1655-1659.
- 2524 83. Sugerman, H., et al., Intra-abdominal pressure, sagittal abdominal diameter and obesity  
2525 comorbidity. *J Intern Med*, 1997. **241**(1): p. 71-79.
- 2526 84. Whiteley, W., et al., CSF opening pressure: Reference interval and the effect of body mass index.  
2527 *Neurology*, 2006. **67**(9): p. 1690-1691.  
2528

A randomised controlled trial of bariatric surgery versus a community weight loss programme for the sustained treatment of Idiopathic Intracranial Hypertension: IIH:WT

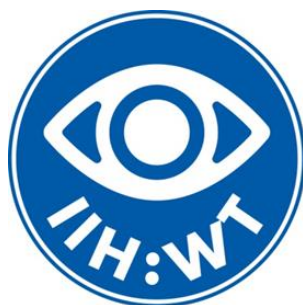

Trial Registration: ISRCTN 40152829

# Statistical Analysis Plan

|                    |
|--------------------|
| SAP Version Number |
| 1.0                |

|                                                             |                 |       |                     |              |                                  |
|-------------------------------------------------------------|-----------------|-------|---------------------|--------------|----------------------------------|
| Author:                                                     | Rebecca Woolley | Role: | Trial Statistician  | Affiliation: | BCTU<br>University of Birmingham |
| Signature:                                                  |                 | Date: |                     |              |                                  |
| Chief Investigator:                                         | Alex Sinclair   | Role: | Chief Investigator  | Affiliation: | University of Birmingham         |
| Signature:                                                  |                 | Date: |                     |              |                                  |
| <b>This Statistical Analysis Plan has been approved by:</b> |                 |       |                     |              |                                  |
| Approver:                                                   | Natalie Ives    | Role: | Senior Statistician | Affiliation: | BCTU<br>University of Birmingham |
| Signature:                                                  |                 | Date: |                     |              |                                  |

15 **Statistical Analysis Plan Amendments**

| SAP version number | Date Approved | Protocol version number† | Section number changed | Description of and reason for change | Timing of change with respect to interim/final analysis | Blind Reviewer |  |
|--------------------|---------------|--------------------------|------------------------|--------------------------------------|---------------------------------------------------------|----------------|--|
|                    |               |                          |                        |                                      |                                                         | Name:          |  |
|                    |               |                          |                        |                                      |                                                         | Signature:     |  |
|                    |               |                          |                        |                                      |                                                         | Date:          |  |
|                    |               |                          |                        |                                      |                                                         | Name:          |  |
|                    |               |                          |                        |                                      |                                                         | Signature:     |  |
|                    |               |                          |                        |                                      |                                                         | Date:          |  |
|                    |               |                          |                        |                                      |                                                         | Name:          |  |
|                    |               |                          |                        |                                      |                                                         | Signature:     |  |
|                    |               |                          |                        |                                      |                                                         | Date:          |  |

16  
 17 This SAP was written based on information contained in the trial protocol version as listed here.  
 18



| <b>Abbreviations &amp; Definitions</b>                    |                                                                                                                                                            |
|-----------------------------------------------------------|------------------------------------------------------------------------------------------------------------------------------------------------------------|
| <b>Abbreviation / Acronym</b>                             | <b>Meaning</b>                                                                                                                                             |
| BCTU                                                      | Birmingham Clinical Trials Unit                                                                                                                            |
| BHH                                                       | Birmingham Heartlands Hospital                                                                                                                             |
| BMI                                                       | Body mass index                                                                                                                                            |
| CONSORT                                                   | Consolidated Standards of Reporting Trials                                                                                                                 |
| DMC                                                       | Data Monitoring Committee                                                                                                                                  |
| HADS                                                      | Hospital Anxiety and Depression Scale                                                                                                                      |
| HIT-6                                                     | Headache Impact Test 6                                                                                                                                     |
| ICP                                                       | Intracranial pressure                                                                                                                                      |
| IIH                                                       | Idiopathic intracranial hypertension                                                                                                                       |
| ISRCTN                                                    | International Standard Randomised Controlled Trial Number                                                                                                  |
| ITT                                                       | Intention to Treat                                                                                                                                         |
| LAGB                                                      | Laparoscopic adjustable gastric banding                                                                                                                    |
| LSG                                                       | Laparoscopic sleeve gastrectomy                                                                                                                            |
| MDT                                                       | Multi-disciplinary team                                                                                                                                    |
| OCT                                                       | Optical coherence tomography                                                                                                                               |
| RYGBP                                                     | Roux-en-Y gastric bypass                                                                                                                                   |
| SAE                                                       | Serious Adverse Event                                                                                                                                      |
| SAP                                                       | Statistical Analysis Plan                                                                                                                                  |
| SF-36                                                     | Short Form-36                                                                                                                                              |
| TSC                                                       | Trial Steering Committee                                                                                                                                   |
| <b>Term</b>                                               | <b>Definition</b>                                                                                                                                          |
| International Standard Randomised Controlled Trial Number | A clinical trial registry                                                                                                                                  |
| Protocol                                                  | Document that details the rationale, objectives, design, methodology and statistical considerations of the study                                           |
| Randomisation                                             | The process of assigning trial subjects to intervention or control groups using an element of chance to determine the assignments in order to reduce bias. |
| Statistical Analysis Plan                                 | Pre-specified statistical methodology documented for the trial, either in the protocol or in a separate document.                                          |



|    |                                                                |    |
|----|----------------------------------------------------------------|----|
| 24 | <b>TABLE OF CONTENTS</b>                                       |    |
| 25 |                                                                |    |
| 26 | 1. Introduction.....                                           | 7  |
| 27 | 2. Background and rationale.....                               | 7  |
| 28 | 3. Trial objectives.....                                       | 7  |
| 29 | 4. Trial methods.....                                          | 8  |
| 30 | 4.1. Trial design.....                                         | 8  |
| 31 | 4.2. Trial interventions.....                                  | 8  |
| 32 | 4.3. Primary outcome measure.....                              | 9  |
| 33 | 4.4. Secondary outcome measures.....                           | 9  |
| 34 | 4.5. Timing of outcome assessments.....                        | 10 |
| 35 | 4.6. Randomisation.....                                        | 10 |
| 36 | 4.7. Sample size.....                                          | 10 |
| 37 | 4.8. Framework.....                                            | 11 |
| 38 | 4.9. Interim analyses and stopping guidance.....               | 11 |
| 39 | 4.10. Internal Pilot Progression Rules.....                    | 11 |
| 40 | 4.11. Timing of final analysis.....                            | 11 |
| 41 | 4.12. Timing of other analyses.....                            | 12 |
| 42 | 4.13. Trial comparisons.....                                   | 12 |
| 43 | 5. Statistical Principles.....                                 | 12 |
| 44 | 5.1. Confidence intervals and p-values.....                    | 12 |
| 45 | 5.2. Adjustments for multiplicity.....                         | 12 |
| 46 | 5.3. Analysis populations.....                                 | 12 |
| 47 | 5.4. Definition of adherence.....                              | 12 |
| 48 | 5.5. Handling protocol deviations and violations.....          | 13 |
| 49 | 5.6. Unblinding.....                                           | 13 |
| 50 | 6. Trial population.....                                       | 13 |
| 51 | 6.1. Recruitment.....                                          | 13 |
| 52 | 6.2. Baseline characteristics.....                             | 14 |
| 53 | 7. Intervention(s).....                                        | 14 |
| 54 | 7.1. Description of the intervention(s).....                   | 14 |
| 55 | 7.2. Adherence to allocated intervention.....                  | 14 |
| 56 | 8. Protocol deviations and violations.....                     | 14 |
| 57 | 9. Analysis methods.....                                       | 14 |
| 58 | 9.1. Covariate adjustment.....                                 | 14 |
| 59 | 9.2. Distributional assumptions and outlying responses.....    | 14 |
| 60 | 9.3. Handling missing data.....                                | 15 |
| 61 | 9.4. Data manipulations.....                                   | 15 |
| 62 | 9.5. Analysis methods – primary outcome.....                   | 21 |
| 63 | 9.6. Analysis methods – secondary outcomes.....                | 21 |
| 64 | 9.7. Analysis methods – exploratory outcomes and analyses..... | 22 |
| 65 | 9.8. Safety data.....                                          | 22 |
| 66 | 9.9. Planned subgroup analyses.....                            | 23 |
| 67 | 9.10. Sensitivity analyses.....                                | 23 |
| 68 | 10. Analysis of sub-randomisations.....                        | 23 |
| 69 | 11. Health economic analysis.....                              | 23 |
| 70 | 12. Statistical software.....                                  | 23 |
| 71 | 13. References.....                                            | 23 |
| 72 | Appendix A: Deviations from SAP.....                           | 25 |
| 73 | Appendix B: Trial schema.....                                  | 25 |
| 74 | Appendix C: Schedule of assessments.....                       | 27 |
| 75 | Appendix D: Template report.....                               | 29 |

76

77

78

79

## 1. Introduction

This document is the Statistical Analysis Plan (SAP) for the IIH:WT trial, and should be read in conjunction with the current trial protocol. This SAP details the proposed analyses and presentation of the data for the main paper(s) reporting the results for the IIH:WT randomised controlled trial. There are numerous sub-studies embedded within the IIH:WT trial; the analyses for these will be described in separate documents.

The results reported in these main papers will follow the strategy set out here. Subsequent analyses of a more exploratory nature will not be bound by this strategy, though they are expected to follow the broad principles laid down here. The principles are not intended to curtail exploratory analysis (e.g. to decide cut-points for categorisation of continuous variables), nor to prohibit accepted practices (e.g. transformation of data prior to analysis), but they are intended to establish rules that will be followed, as closely as possible, when analysing and reporting data.

Any deviations from this SAP will be described and justified in the final report or publication of the trial (using a table as shown in Appendix A). The analysis will be carried out by an appropriately qualified statistician, who should ensure integrity of the data during their data cleaning processes.

## 2. Background and rationale

The background and rationale for the trial are outlined in detail in the protocol. In brief, IIH:WT is a trial in participants who have idiopathic intracranial hypertension (IIH) which is characterised by elevated intracranial pressure (ICP) and papilloedema. IIH is a condition found almost exclusively in obese women (90%), and causes disabling daily headaches and loss of vision, which is severe and permanent in up to 25% of cases.<sup>1</sup> Weight loss has been suggested as a treatment strategy in IIH. In a prospective study of 25 women, the use of a very low calorie diet which led to weight loss and significantly reduced body mass index (BMI) significantly lowered ICP and significantly improved papilloedema, vision and headache symptom.<sup>2</sup>

Weight loss, achieved through intensive dieting, is an effective therapeutic strategy in IIH. However, long-term maintenance of weight loss is poor, which leads to recurrence of symptoms. Bariatric surgery has been shown to be a sustainable approach to weight loss, and so may offer a long-term treatment of IIH. Surgery has advantages over other weight management interventions; weight loss is greater with bariatric surgery than with other weight reducing approaches and weight loss is more likely to be sustained.

## 3. Trial objectives

The primary objective is to assess if weight loss through bariatric surgery and/or a dietary weight loss programme is an effective treatment for IIH. IIH:WT will evaluate the effectiveness of two methods of weight loss for the treatment of IIH in women with a BMI greater than 35kg/m<sup>2</sup> with active IIH: bariatric surgery vs. dietary weight loss programme. It will:

- Evaluate if weight loss achieved through bariatric surgery reduces ICP and consequently treats patients with IIH.
- Evaluate if bariatric surgery is more effective than a dietary weight loss programme in

- reducing ICP and consequently treating patients with IIH.
- Evaluate the long-term effectiveness of bariatric surgery versus a dietary weight loss programme in reducing ICP and consequently treating patients with IIH.

Secondary aims are to evaluate the clinical effectiveness, cost-effectiveness and participant-centred clinical outcomes (e.g. quality of life) of bariatric surgery versus a dietary weight loss programme.

## **4. Trial methods**

### **4.1. Trial design**

IIH:WT is a prospective, open-label, parallel group, randomised controlled trial where participants with IIH will be randomised in a 1:1 ratio to an NHS bariatric surgery pathway or to a community based Weight Watchers dietary weight loss programme. See Appendix B for Study Schema.

The trial will necessarily be open-label due to the nature of the intervention, though assessors of the visual outcomes will be masked to randomised treatment allocation. The primary outcome, ICP, is not a subjective measure.

### **4.2. Trial interventions**

Participants randomised to the bariatric surgery arm of the trial will be referred to the local NHS bariatric surgical pathway and, if judged suitable according to the bariatric surgery clinic's screening processes, will undergo laparoscopic adjustable gastric banding (LAGB), Roux-en-Y gastric bypass (RYGBP) or laparoscopic sleeve gastrectomy (LSG). The decision of which surgery to undergo will be made between the surgeon and participant based on the participant's health circumstances and preference.

As way of illustration, the pathway followed at Birmingham Heartlands Hospital (BHH) will be described here. Initially the participant will be seen in the weight management clinic for medical and psychological assessment for bariatric surgery. This assessment period will last as long as the weight management team find appropriate. Once the weight management team are satisfied that the participant is suitable, they will be discussed in the joint multi-disciplinary team (MDT) meeting prior to attending a group session for education regarding bariatric surgery. The participant will then have an outpatient appointment with the Consultant Bariatric Surgeon and given a date for surgery. They will be given up to 12 weeks for further consideration of the procedure if they require it. It is envisioned that the standard patient pathway will take approximately 4 months from randomisation to surgery.

Participants randomised to the dietary weight loss programme arm will be provided with vouchers that exempt them from paying for 52 consecutive and specified weeks of their local Weight Watchers. They will be given the vouchers in batches covering 12 sessions at baseline, 3, 6 and 9 months; these will allow access to 12 sessions in the weekly meetings and to Weight Watchers online and mobile tools. Attendance at the groups will be monitored through participant self-reporting.

### 4.3. Primary outcome measure

The primary outcome is to examine the effect of bariatric surgery on ICP, as measured by lumbar puncture in cmCSF at 12 months. The primary outcome measure is the difference in ICP at 12 months.

### 4.4. Secondary outcome measures

Secondary outcomes are as follows:

- ICP at 24 and 60 months;
- Reported IIH symptoms (presence or absence of tinnitus, visual loss, diplopia, visual obscurations and headache) at 12 months (and at 24 and 60 months);
- Visual function in both eyes (measured by LogMAR chart to assess visual acuity, automated perimetry (Humphrey 24-2 central threshold) to measure the visual field mean deviation, a MARS chart to evaluate contrast sensitivity, and Ishihara charts to measure colour vision) at 12 months (and at 24 and 60 months);
- Papilloedema in both eyes (measured by masked assessment of fundus photography and by Optical Coherence Tomography scans (OCT)) at 12 months (and at 24 and 60 months);
- Headache associated disability using the headache impact test-6 score (HIT-6) and headache diary at 12 months (and at 24 and 60 months);
- Anthropometric measures (e.g. waist, hip, fat mass, blood pressure) at 12 months (and at 24 and 60 months);
- Quality of life (participant reported using the EQ-5D-5L, Short Form-36 (SF-36) version 1 questionnaire, Hospital Anxiety and Depression Scale (HADS) and Allodynia Symptom Checklist-12) at 12 months (and at 24 and 60 months);
- Difference in number of referrals to CSF shunting procedures and optic nerve sheath fenestration between treatment arms at 12 months (and at 24 and 60 months).

Fundus photographs will be reviewed by the virtual reading centre which includes three masked neuro-ophthalmologists who will grade the images. They will assign a Frisen grading to each image, and will score the paired (baseline and each follow-up) papilloedema images as better/same/worse. The Frisen grading is scored on a 0 to 5 integer scale with 0=normal optic disc and 5=severe papilloedema. A consensus grading and score will be used for the analysis. Where at least two of the neuro-ophthalmologists are in agreement in the Frisen grading and/or score, then these values will be considered the consensus values. Where this is not the case and there is disagreement across the neuro-ophthalmologists in the Frisen grading and/or score, the reviewers will meet (in person or by video conference) to discuss and arrive at a consensus grading and score.

The following participant completed headache evaluation and generic quality of life questionnaires will be used:

- Headache associated disability using the HIT-6 score (score ranges from 36=best outcome to 78=worst outcome);
- EQ-5D 5L index score (score ranges from -0.281=worst outcome to 1=best outcome);
- EQ-5D health thermometer (score ranges from 0=worst outcome to 100=best outcome);
- SF-36 score (score ranges from 0=worst outcome to 100=best outcome);

- HADS (score ranges from 0=best outcome to 21=worst outcome; 0-7=normal, 8-10=borderline abnormal, 11-21=abnormal);
- Allodynia symptom checklist-12 (score ranges from 0=no symptoms to 24=severe symptoms; 0-2=no allodynia, 3-5=mild allodynia, 6-8=moderate allodynia, 9 or more=severe allodynia).

Note: In the protocol, the ICECAP-A is included in the list of participant completed quality of life questionnaires. This questionnaire forms part of the health economic analysis, and so will not be analysed as part of this SAP.

The Allodynia symptom checklist is completed at each assessment as part of the headache diary and then also as part of the participant booklet. The Allodynia symptom checklist in the headache diary gives an at ictus (i.e. maximum severity headache) score and the participant booklet gives an inter-ictal (i.e. between headache) score. These will be analysed separately.

The Headache Diary is completed over 7 days at baseline (participants complete a daily headache diary in the week before the baseline/screening visit) and again at 12, 24 and 60 months (participants complete a daily headache diary in the week prior to visit). Severity (0-5)\* and duration (over each 24 hour period) of headache are reported for each day, along with the use of analgesia.

\*Headache diary severity score changed to 0-10 during the trial (see section 9.4).

See Appendix C for assessment time points.

#### **4.5. Timing of outcome assessments**

The schedule of trial procedures and outcome assessments are given in Appendix C.

#### **4.6. Randomisation**

Participants will be randomised in a 1:1 ratio to either bariatric surgery or dietary weight loss programme.

Randomisation will be provided by a computer generated allocation list held centrally at the Birmingham Clinical Trials Unit (BCTU). The randomisation will be stratified by the following variable:

- Whether or not the patient is taking acetazolamide at entry (yes or no).

#### **4.7. Sample size**

The trial aims to randomise 64 participants, 32 participants to each arm (bariatric surgery versus dietary weight loss programme).

For this study, we are hypothesising that the greater weight loss anticipated in the bariatric surgery arm compared to the dietary weight loss arm will consequently reduce the ICP further in the bariatric arm than in the dietary weight loss arm. Bariatric surgery patients typically lose 31% ± 3% of body weight by 12 months.<sup>3</sup> A weight loss of 15.3% ± 7.0% of body weight over 3 months was achieved by patients following a low calorie diet.<sup>2</sup> Data from this study



showed that ICP was significantly reduced by 20% (ICP at baseline in 20 IIH patients was  $39.8 \pm 5.1$  cmCSF and ICP was reduced by  $8 \pm 4.2$  cmCSF,  $p < 0.001$ ).

If we assume a conservative change of ICP in the bariatric surgery arm to that previously observed of 8 cmCSF and a change of 3cmCSF in the dietary weight loss arm (a value to reflect changes slightly greater than the baseline fluctuations seen in our previous study), then we are looking to detect a mean difference of 5cmCSF between the groups. To detect this difference of 5cmCSF with 90% power and  $\alpha = 0.05$  using a 2-sided t-test (assuming a standard deviation of 5.1) requires a total of 46 patients (23 per arm). If we allow for a 28% drop out rate, then we will need to recruit 32 patients per arm, 64 patients in total.

It is believed that the SD of 5.1 is a true reflection of the variability of the data as this is taken from the baseline measurements from our previous study, which is a similar population to that which will be recruited into this study.<sup>2</sup> However, this assumption for the sample size calculation will be monitored during the trial as part of the interim analyses.

#### **4.8. Framework**

The objective of the trial is to test the superiority of one intervention to another.

The null hypothesis is that there is no difference in ICP between the intervention groups. The alternative hypothesis is that there is a difference between the groups.

#### **4.9. Interim analyses and stopping guidance**

If one treatment arm is more effective with respect to the primary endpoint than the other, then this may become apparent before the target recruitment has been reached. Alternatively, new evidence might emerge from other sources that one of the treatment arms is definitely effective. To protect for this, during the period of recruitment to the trial, interim analyses of major endpoints will be supplied, in strict confidence, to the independent Data Monitoring Committee (DMC) along with updates on results of other related studies, and any other analyses that the DMC may request.

The DMC will advise the chair of the Trial Steering Committee (TSC) if, in their view, either of the randomised comparison in the trial has provided both (a) "proof beyond reasonable doubt<sup>†</sup>" and (b) evidence that might reasonably be expected to influence the patient management of many clinicians who are already aware of the other main trial results.

<sup>†</sup>Appropriate criteria of proof beyond reasonable doubt cannot be specified precisely, but a difference of at least  $p < 0.001$  (similar to Haybittle-Peto boundary) in an interim analysis of a major endpoint may be needed to justify halting, or modifying, the study prematurely. If this criterion were to be adopted, it would have the practical advantage that the exact number of interim analyses would be of little importance, so no fixed schedule is proposed.

#### **4.10. Internal Pilot Progression Rules**

Not applicable.

#### **4.11. Timing of final analysis**

The primary analysis for the study will occur once all participants have completed the 12

month assessment and the corresponding outcome data has been entered onto the study database and validated as being ready for analysis. This is provided the study has not stopped recruitment early for any reason (e.g. DMC advice or funding body request).

#### **4.12. Timing of other analyses**

Data is also being collected at 24 and 60 months, therefore longer-term analysis will occur after the last patient has reached 60 months. The analysis methods described in this SAP will be used for analyses performed at this time point.

#### **4.13. Trial comparisons**

All references in this document to 'group' or 'arm' refer to Bariatric Surgery or Dietary Weight Loss Programme, the two treatment arms in the trial.

### **5. Statistical Principles**

#### **5.1. Confidence intervals and p-values**

All estimates of differences between groups will be presented with two-sided 95% confidence intervals, unless otherwise stated. P-values will be reported from two-sided tests at the 5% significance level.

#### **5.2. Adjustments for multiplicity**

No correction for multiple testing will be made.

#### **5.3. Analysis populations**

All primary analyses (primary and secondary outcomes including safety outcomes) will be by intention-to-treat (ITT). Participants will be analysed in the intervention group to which they were randomised, and all participants shall be included whether or not they received the allocated intervention. This is to avoid any potential bias in the analysis.

A per protocol analysis will also be carried out for the primary outcome. See section 5.4 for definition of adherence and hence the per protocol group. See section 9.10 for further details on planned sensitivity analyses.

#### **5.4. Definition of adherence**

The expected standard patient pathway for bariatric surgery is expected to take 4 months from randomisation to surgery. Therefore, in the majority of cases, patients should have received bariatric surgery by 4 months after randomisation, but in some cases it could be longer. For the assessment of adherence to surgery within the IIH:WT trial, a patient is considered adherent if they receive bariatric surgery within 12 months of randomisation.

In the dietary weight loss programme arm, participants' attendance to the Weight Watchers sessions will be monitored through self-reporting, but there is not a percentage threshold for which a patient will be considered non-adherent. This is because this arm is acting as the reference group. A patient in the dietary weight loss programme arm who receives bariatric surgery will be considered a cross-over patient (and thus classed as non-adherent).

Within IIH:WT, the per-protocol analysis population is defined as:

**Per-protocol population:**

Bariatric surgery: Participants who had surgery, and surgery was received within 12 months of randomisation.

Dietary weight loss programme: Participants who did not have bariatric surgery by 12 months.

## 5.5. Handling protocol deviations and violations

A protocol deviation/violation is defined as a failure to adhere to the protocol such as errors in applying the inclusion/exclusion criteria, the incorrect intervention being given, incorrect data being collected or measured, follow-up visits outside the visit window or missed follow-up visits. We will apply a strict definition of the ITT principle and will include all participants as per the ITT population described in section 5.3 in the analysis in some form regardless of deviation from the protocol.<sup>4</sup> This includes participants who were randomised but later found to violate the inclusion or exclusion criteria. This does not include those participants who have specifically withdrawn consent for the use of their data in the first instance; however these outcomes will be explored as per other missing responses.

Many of the participants taking part in the study will be of childbearing age. Pregnancy is a study exclusion criteria and it is recommended that patients do not become pregnant within a year of surgery, so women planning pregnancy will not be recruited. However, if a trial participant becomes pregnant during the trial, these patients will be excluded from further intervention (will not receive surgery if becomes pregnant before surgical intervention if randomised to the surgery arm, or will discontinue with the weight watchers programme if randomised to the dietary weight loss programme arm). To allow an ITT analysis to be undertaken, these patients will be followed up as per trial protocol where possible. However, if a patient is pregnant, it will not be possible to collect data on ICP, as a lumbar puncture cannot be performed if the patient is pregnant. In these cases, data on ICP will be collected at the earliest possible date post-partum.

The primary outcome is ICP at 12 months. All data will be included in the primary analysis regardless of the time the assessment was completed. A sensitivity analysis where patients whose ICP was collected early (with early defined as >1.5 months before the 12 month assessment date) or late (due to pregnancy or other reasons, with late defined as >3 months post the 12 month assessment date) are excluded from the analysis will be undertaken (see section 9.10).

## 5.6. Unblinding

Not applicable, IIH:WT is an open-label study.

## 6. Trial population

### 6.1. Recruitment

A flow diagram (as recommended by CONSORT<sup>5</sup>) will be produced to describe the participant flow through each stage of the trial. This will include information on the number (with reasons) of losses to follow-up (drop-outs and withdrawals) over the course of the trial. A template for reporting this is given in the Template Final Report.

## **6.2. Baseline characteristics**

The study population will be tabulated as per the Template Final Report. Categorical data will be summarised by number of participants, counts and percentages. Continuous data will be summarised by the number of participants, mean and standard deviation if deemed to be normally distributed or number of participants, median and interquartile range if data appear skewed, and ranges if appropriate. Tests of statistical significance will not be undertaken, nor confidence intervals presented.<sup>6</sup>

## **7. Intervention(s)**

### **7.1. Description of the intervention(s)**

Information on the type of bariatric surgery received and timing of surgery will be reported. A template for reporting this information is given in the Template Final Report.

### **7.2. Adherence to allocated intervention**

A tabulation of those randomised to the bariatric surgery arm who received bariatric surgery and those who did not have bariatric surgery will be produced. A separate table will tabulate attendance at the Weight Watchers sessions for those in the dietary weight loss programme arm. A template for reporting this information is given in the Template Final Report.

## **8. Protocol deviations and violations**

Frequencies and percentages by group will be tabulated for the protocol deviations and violations as per the Template Final Report.

## **9. Analysis methods**

Intervention groups will be compared using generalised estimating equations, or a similar method, to adjust for all covariates as specified in section 9.1, where possible.

### **9.1. Covariate adjustment**

In the first instance, intervention effects between groups for all outcomes will be adjusted for the stratification parameter listed in section 4.6 (whether or not the participant is taking acetazolamide at entry – yes or no), unless otherwise stated. Other covariate adjustment will be baseline values for parameters where available (e.g. analysis of ICP at 12 months will also include the baseline ICP as a covariate in the model). If covariate adjustment results in problems with the model converging, then the stratification variable will be removed from the model first. If model convergence is still a problem then unadjusted estimates will be produced. It will be made clear in the final report why this occurred (e.g. not possible due to low event rate / lack of model convergence).

### **9.2. Distributional assumptions and outlying responses**

Distributional assumptions (e.g. normality of regression residuals for continuous outcomes) will be assessed visually prior to analysis; although in the first instance the proposed primary method of estimation in this analysis plan will be followed. If responses are considered to be particularly skewed and/or distributional assumptions violated, the impact of this will be

examined through sensitivity analysis; this will consist of transformation of responses prior to analysis (e.g. log transformation) in the first instance. If extreme values are apparent and considered to be affecting the integrity of the analysis, a sensitivity analysis consisting of removing the outlying response(s) and repeating the analysis will be performed. Output from these analyses, if performed, will be described and presented alongside the original analysis (or included, e.g. in appendices) with the excluded values clearly labelled.

### 9.3. Handling missing data

In the first instance, analysis will be completed on received data only with every effort made to follow-up participants even after protocol violation to minimise any potential for bias. To examine the possible impact of missing data on the results, and to make sure we are complying with the ITT principle, sensitivity analysis will be performed on the primary outcome measure.<sup>7</sup> See section 9.10 for further details.

### 9.4. Data manipulations

The Trial Statistician will derive all responses from the raw data recorded in the database. The specifics of the data manipulations required are as follows.

Scoring for the participant questionnaires is detailed below:

- **HIT-6**

The HIT-6 response scales are coded as follows:

- Question 1: Never=6, Rarely=8, Sometimes=10, Very often=11, Always=13
- Question 2: Never=6, Rarely=8, Sometimes=10, Very often=11, Always=13
- Question 3: Never=6, Rarely=8, Sometimes=10, Very often=11, Always=13
- Question 4: Never=6, Rarely=8, Sometimes=10, Very often=11, Always=13
- Question 5: Never=6, Rarely=8, Sometimes=10, Very often=11, Always=13
- Question 6: Never=6, Rarely=8, Sometimes=10, Very often=11, Always=13

A total score is calculated by summing each question score as follows:

- Total=SUM(Question1, Question2, Question3, Question4, Question5, Question6)

HIT-6 ranges from 36-78 where a low score indicates no impact of headache.

- **EQ-5D (5 level)<sup>8</sup>**

The EQ-5D (5 level) response scales are coded as follows:

- Mobility: I have no problems in walking about=0, I have slight problems in walking about=0.051, I have moderate problems in walking about=0.063, I have severe problems in walking about=0.212, I am unable to walk about=0.275

- Self-care: I have no problems washing or dressing myself=0, I have slight problems washing or dressing myself=0.057, I have moderate problems washing or dressing myself=0.076, I have severe problems washing or dressing myself=0.181, I am unable to wash or dress myself=0.217
- Usual activities: I have no problems doing my usual activities=0, I have slight problems doing my usual activities=0.051, I have moderate problems doing my usual activities=0.067, I have severe problems doing my usual activities=0.174, I am unable to do my usual activities=0.190
- Anxiety: I am not anxious or depressed=0, I am slightly anxious or depressed=0.079, I am moderately anxious or depressed=0.104, I am severely anxious or depressed=0.296, I am extremely anxious or depressed=0.301
- Pain: I have no pain or discomfort=0, I have slight pain or discomfort=0.060, I have moderate pain or discomfort=0.075, I have severe pain or discomfort=0.276, I have extreme pain or discomfort=0.341.

The EQ-5D (5 level) index score is derived as follows:

- Index score =  $1 - 0.9675 \times \text{SUM}(\text{Mobility, Self-care, Usual activities, Anxiety, Pain})$

The EQ-5D (5 level) index score ranges from  $-0.281$  to  $1$ , where a score of  $1$  implies perfect health, a score of  $0$  implies a health status of death and negative scores imply a health status worse than death. No missing data items are permitted in order to compute a score.

- **SF-36 (v1)<sup>9</sup>**

The SF-36 response scales are coded as follows:

- Question 1: Excellent=100, Very good=75, Good=50, Fair=25, Poor=0
- Question 2: Much better than 1 year ago=100, Somewhat better than 1 year ago=75, About the same=50, Somewhat worse now than 1 year ago=25, Much worse now than 1 year ago=0
- Questions 3-12: Yes limited a lot=0, Yes limited a little=50, No not limited at all=100
- Questions 13-19: Yes=0, No=100
- Question 20: Not at all=100, Slightly=75, Moderately=50, Quite a bit=25, Extremely=0

- Question 21: None=100, Very mild=80, Mild=60, Moderate=40, Severe=20, Very severe=0
- Question 22: Not at all=100, Slightly=75, Moderately=50, Quite a bit=25, Extremely=0
- Questions 23, 26, 27, 30: All of the time=100, Most of the time=80, A good bit of the time=60, Some of the time=40, A little of the time=20, None of the time=0
- Questions 24, 25, 28, 29, 31: All of the time=0, Most of the time=20, A good bit of the time=40, Some of the time=60, A little of the time=80, None of the time=100
- Question 32: Not at all=100, Slightly=75, Moderately=50, Quite a bit=25, Extremely=0
- Questions 33, 35: Definitely true=0, Mostly true=25, Don't know=50, Mostly false=75, Definitely false=100
- Questions 34, 36: Definitely true=100, Mostly true=75, Don't know=50, Mostly false=25, Definitely false=0.

The SF-36 domain scores listed below will be derived from summing the items in that domain and dividing by the number of items in that domain as follows:

- Physical functioning =  $\text{SUM}(3-12)/10$
- Role limitations due to physical health =  $\text{SUM}(13-16)/4$
- Role limitations due to emotional problems =  $\text{SUM}(17-19)/3$
- Energy/fatigue =  $\text{SUM}(23, 27, 29, 31)/4$
- Emotional well-being =  $\text{SUM}(24, 25, 26, 28, 30)/5$
- Social functioning =  $\text{SUM}(20, 32)/2$
- Pain =  $\text{SUM}(21, 22)/2$
- General health =  $\text{SUM}(1, 33-36)/5$ .

The SF-36 scores range from 0-100 where lower scores suggest greater presence of

limitations in that domain, and no missing data is permitted in order to compute a score.

- **HADS<sup>10</sup>**

The HADS response scales are coded as follows:

- Question 1 (I feel tense or 'wound up'): Not at all=0, From time to time occasionally=1, A lot of the time=2, Most of the time=3
- Question 2 (I feel as if I am slowed down): Not at all=0, Sometimes=1, Very often=2, Nearly all the time=3
- Question 3 (I still enjoy the things I used to enjoy): Definitely as much=0, Not quite so much=1, Only a little=2, Hardly at all=3
- Question 4 (I get a sort of frightened feeling like 'butterflies' in the stomach): Not at all=0, Occasionally=1, Quite often=2, Very often=3
- Question 5 (I get a sort of frightened feeling as if something awful is about to happen): Not at all=0, A little but it doesn't worry me=1, Yes but not too badly=2, Very definitely and quite badly=3
- Question 6 (I have lost interest in my appearance): I take just as much care as ever=0, I may not take quite as much care=1, I don't take as much care as I should=2, Definitely=3
- Question 7 (I can laugh and see the funny side of things): As much as I always could=0, Not quite so much now=1, Definitely not so much now=2, Not at all=3
- Question 8 (I feel restless as if I have to be on the move): Not at all=0, Not very much=1, Quite a lot=2, Very much indeed=3
- Question 9 (Worrying thoughts go through my mind): Very Little=0, From time to time but not too often=1, A lot of the time=2, A great deal of the time=3
- Question 10 (I look forward with enjoyment to things): As much as I ever did=0, Rather less than I used to=1, Definitely less than I used to=2, Hardly at all=3
- Question 11 (I feel cheerful): Most of the time=0, Sometimes=1, Not often=2, Never=3
- Question 12 (I get sudden feelings of panic): Not at all=0, Not very often=1, Quite often=2, Very often indeed=3



- Question 13 (I can sit at ease and feel relaxed): Definitely=0, Usually=1, Not often=2, Not at all=3
- Question 14 (I can enjoy a good book or radio or television programme): Often=0, Sometimes=1, Not often=2, Very seldom=3

The HADS subscale scores listed below will be derived from summing the items in that subscale, as follows:

- Anxiety subscale = SUM(1, 4, 5, 8, 9, 12, 13)
- Depression subscale = SUM(2, 3, 6, 7, 10, 11, 14)

The HADS subscale scores range from 0 to 21, where low scores are good and high scores are bad. One missing data item is permitted in this subscale and is computed at the participant level as follows:

Subscale = (SUM(completed items in subscale)/6)\*7

The HADS subscale scores can also be dichotomised using cut-off values as follows:

- Normal 0-7
- Borderline Abnormal 8-10
- Abnormal 11-21.

- **Allodynia symptom checklist-12**

The allodynia symptom checklist response scales are coded as follows:

- Combing your hair: Does not apply=0, Never=0, Rarely=0, Less than half the time=1, Half the time or more=2
- Pulling your hair back: Does not apply=0, Never=0, Rarely=0, Less than half the time=1, Half the time or more=2
- Shaving your face: Does not apply=0, Never=0, Rarely=0, Less than half the time=1, Half the time or more=2
- Wearing eyeglasses: Does not apply=0, Never=0, Rarely=0, Less than half the time=1, Half the time or more=2
- Wearing contact lenses: Does not apply=0, Never=0, Rarely=0, Less than half the time=1, Half the time or more=2
- Wearing earrings: Does not apply=0, Never=0, Rarely=0, Less than half the time=1, Half the time or more=2
- Wearing necklace: Does not apply=0, Never=0, Rarely=0, Less than half the time=1,

Half the time or more=2

- Wearing tight clothing: Does not apply=0, Never=0, Rarely=0, Less than half the time=1, Half the time or more=2
- Taking a shower: Does not apply=0, Never=0, Rarely=0, Less than half the time=1, Half the time or more=2
- Resting your face or head on a pillow: Does not apply=0, Never=0, Rarely=0, Less than half the time=1, Half the time or more=2
- Exposure to heat: Does not apply=0, Never=0, Rarely=0, Less than half the time=1, Half the time or more=2
- Exposure to cold: Does not apply=0, Never=0, Rarely=0, Less than half the time=1, Half the time or more=2

The total score is calculated by summing the values for each question.

The score ranges from 0 to 24 where a low score is good

The allodynia scores can also be dichotomised using cut-off values as follows:

0-2 = no allodynia

3-5 = mild allodynia

6-8 = moderate allodynia

9 or more = severe allodynia

- **Headache diary data**

The Headache Diary is completed over 7 days prior to the assessment visit with information on severity and duration of headache, and use of analgesia recorded.

- The overall headache severity score for each participant is calculated by summing the severity score reported on each day that a headache was reported, divided by the number of days that a headache was reported. There are 2 versions of the headache diary. The first version scored headache severity on a 0-5 scale. The second version scored headache severity on a 0-10 scale. In both cases, a score of zero means no headache and does not contribute to the severity score. To combine the scores, the first version using the 0-5 scores will be mapped onto the second version scores using the following method: 0=0; 1=2; 2=4; 3=6; 4=8; and 5=10.
- The overall duration of headache (hours) for each participant is calculated by summing the duration of headache reported on each day that a headache was reported, divided by the number of days that a headache was reported.
- Headache frequency is calculated as the number of days a headache is experienced that week. In line with international Headache society reporting guidelines on headache

outcomes which recommends reporting headache frequency per month, the weekly headache frequency will then be multiplied by 4 to provide a headache frequency per month (which will then be comparable with other trial datasets).

- Similarly, analgesic use will be calculated by summing up the number of times they are used over a week, then multiplied by 4 to provide analgesic use per month.

For headache frequency and analgesic use, if there is missing data in the headache diary, meaning that an incomplete week of headache data is available, the data reported will be extrapolated to calculate a full week value before being multiplied by 4 to obtain the frequency by month. For example, if a patient reports the following:

Headache, missing, No Headache, Headache, missing, Headache, No Headache. This corresponds to 3 days of headache over 5 days. This would be extrapolated to a week by  $3/5 \times 7 \text{ days} = 4.2 \text{ days of headache/week}$ . Then  $4.2 \times 4 = 16.8 \text{ days/month}$ .

Other outcomes will be calculated as follows:

- Age – number of days from date of birth to randomisation date divided by 365.25 to give age in years;
- Duration of IIH – number of days from date of diagnosis of IIH to randomisation date divided by 30.4 to give duration of IIH in months;
- Blood pressure – take average of 2<sup>nd</sup> and 3<sup>rd</sup> measure if present. If only one set of BP measures reported then these values will be used;
- Length of stay – the number of days from date of surgery to date of discharge;
- Worst eye – the eye that has the worst Mean Deviation (most negative value) score on the Humphrey Visual field assessment at baseline will be considered the 'worst eye' for all analyses. Unless that eye has a Frisen grade of zero, in which case the other eye will be considered the worse eye;
- Best (fellow) eye – the eye that has the better Mean Deviation (most positive score) score on the Humphrey Visual field assessment at baseline will be considered the 'best eye' for all analyses;
- Ishihara colour assessment – number of correct plates / number of plates x 100%.

## **9.5. Analysis methods – primary outcome**

A template for reporting the primary outcome is given in the Template Final Report.

The primary outcome is the ICP at 12 months and will be summarised using means and standard deviations. A linear regression model will be used to compare the ICP at 12 months between the two arms, with baseline ICP and the stratification variable in section 4.6 included as covariates in the model, where possible, with the adjusted mean difference between groups presented alongside the 95% confidence interval.

## **9.6. Analysis methods – secondary outcomes**

A template for reporting the secondary outcomes is given in the Template Final Report.

Continuous data items (e.g. HIT-6, anthropometric data) will be analysed in the same way as the primary outcome. Analyses will be performed on data at 12, 24 and 60 months. For the visual function and papilloedema (Frisen grading) data which is collected in both eyes, data will be presented for the worst eye and the best eye separately (see section 9.4), and analysed as per the primary outcome.

The Fundus photographs at 12, 24 and 60 months are also compared to the baseline photograph to assess whether the image is better, worse or the same as the baseline photograph (see section 4.4). The same, better or worse data will be presented for the worst eye and the best eye separately, and analysed at 12, 24 and 60 months using a chi-squared test.

The IIH symptom data is binary. The number and percentage of participants experiencing each symptom will be presented at baseline and 12, 24 and 60 months by treatment arm. Log-binomial models will be used to compare the symptom data between the two arms at 12, 24 and 60 months, with current IIH symptom and the stratification variable in section 4.6 included as covariates in the model, where possible, with the adjusted relative risk presented alongside the 95% confidence interval.

Similarly, the number of referrals to CSF shunting procedures and optic nerve sheath fenestration is binary. Data will be presented at 12, 24 and 60 months by treatment arm. Log-binomial models will be used to compare the data between the two arms at 12, 24 and 60 months, with the stratification variable in section 4.6 included as a covariate in the model, where possible, with the adjusted relative risk presented alongside the 95% confidence interval.

## **9.7. Analysis methods – exploratory outcomes and analyses**

Any data that does not form an outcome will be presented using simple summary statistics by treatment group (i.e. numbers and proportions for binary data and mean (median) and standard deviation (inter-quartile range) for continuous normal (non-normal) data).

We are hypothesising that those in the bariatric surgery arm will have a lower ICP than those in the dietary weight loss programme arm at 12 months. This is based on the fact that weight loss in the bariatric surgery arm should be greater than those in the dietary weight loss programme arm. To assess association between weight loss and ICP, scatter plots of change in weight and change in ICP (between baseline and 12 months), change in BMI and change in ICP (between baseline and 12 months) and percentage weight loss and change in ICP (between baseline and 12 months) will be presented and a Spearman's correlation coefficient by treatment group will be produced.

## **9.8. Safety data**

The number and percentage of patients experiencing any serious adverse events (SAEs) will be presented by group. Statistical significance will be determined by chi-squared test. No other formal analysis is anticipated due to the low anticipated frequency of events. A detailed descriptive table of all SAEs will be produced including the proportion and percentage of those determined to be treatment related (causality) by group. A template for reporting is given in the Template Final Report.

## 9.9. Planned subgroup analyses

There are no planned subgroups analyses as part of this SAP.

## 9.10. Sensitivity analyses

Sensitivity analyses will be limited to the primary outcome and will consist of:

- Per-protocol analyses (using the per-protocol analysis population described in section 5.4);
- An analysis to assess the effect of missing responses using last observation carried forward (the primary outcome is only collected in both groups at baseline and 12 months, so this is essentially carrying forward the baseline ICP to 12 months, which is essentially assuming no change) and multiple imputation (with the following variables used baseline ICP, BMI, mean deviation, OCT, on acetazolamide at entry (stratification variable) and randomised treatment);
- An analysis to assess the effect of ICP data collected outside the time window by excluding ICP values that are -1.5 or +3 months outside the 12 month assessment point;
- An analysis to assess the effect of any technical errors with the visual tests on the outcome mean deviation.<sup>11</sup> If patient has either a false positive value >15% or a false negative value >25% or a fixation loss value >33%, then the mean deviation value for that patient is excluded.

## 10. Analysis of sub-randomisations

Not applicable.

## 11. Health economic analysis

As indicated in the protocol there will also be an economic analysis. The details of this analysis are documented separately.

## 12. Statistical software

SAS software, version 9.4 (or higher) and/or Stata version 15 (or higher) will be used for all analyses.

## 13. References

1. Scott CJ, Kardon RH, Lee AG, Frisén L, Wall M. Diagnosis and grading of papilledema in patients with raised intracranial pressure using optical coherence tomography vs clinical expert assessment using a clinical staging scale. *Arch Ophthalmol.* 2010;128(6):705-11.
2. Sinclair AJ, Burdon MA, Nightingale PG, Ball AK, Good P, Matthews TD, et al. Low energy diet and intracranial pressure in women with idiopathic intracranial hypertension: prospective cohort study. *BMJ* 2010;341:c2701
3. Colquitt JL, Picot J, Loveman E, Clegg AJ. Surgery for obesity. *Cochrane Database Syst Rev* 2009;(2):CD003641
4. Gupta SK. Intention-to-treat concept: A review. *Perspect Clin Res.* 2011;2(3):109-112.
5. Schulz KF, Altman DG, Moher D, for the CONSORT Group. CONSORT 2010 Statement: updated guidelines for reporting parallel group randomised trials. *BMJ.* 2010;340:c332.
6. Altman DG, Dore CJ. Randomisation and baseline comparisons in clinical trials. *Lancet.*

1990;335:149–53.

7. White IR, Horton NJ, Carpenter J, Pocock SJ. Strategy for intention to treat analysis in randomised trials with missing outcome data. *BMJ*. 2011;342:d40.
8. Devlin N, Shah K, Feng Y, Mulhern B, van Hout B. Valuing Health-Related Quality of Life: An EQ-5D-5L Value Set for England. Office of Health Economics. 2016, Research Paper 16/01
9. Ware, John E., and Cathy Donald Sherbourne. "The MOS 36-Item Short-Form Health Survey (SF-36): I. Conceptual Framework and Item Selection." *Medical Care*, vol. 30, no. 6, 1992, pp. 473–483. *JSTOR*, JSTOR, [www.jstor.org/stable/3765916](http://www.jstor.org/stable/3765916).
10. Zigmond AS, Snaith RP. The hospital anxiety and depression scale. *Acta Psychiatr Scand* 1983 Jun;67(6):361-70.
11. Wall M, Johnson CA, Cello KE, et al. Visual Field Outcomes for the Idiopathic Intracranial Hypertension Treatment Trial (IIHTT). *Investigative Ophthalmology & Visual Science*. 2016;57(3):805-12.

81

82

## Appendix A: Deviations from SAP

This report below follows the statistical analysis plan dated <insert effective date of latest SAP> apart from following:

| Section of report not following SAP | Reason                                             |
|-------------------------------------|----------------------------------------------------|
| <insert section >                   | <insert, e.g. exploratory analyses request by TMG> |

## Appendix B: Trial schema

Potential participants identified using hospital informatics.

Nurse / research fellow discusses trial with potential participant. If they consent to pre-screening they will undergo fundus photography and evaluation of their papilloedema. If the papilloedema are graded severe enough they will be given a headache diary to complete. Potential participant will be scheduled for a screening visit.

If still interested and eligible, potential participants will be given time to ask further questions about the trial at this appointment. If they wish to take part written informed consent will be taken and the participant will undergo screening and a battery of tests and patient completed questionnaires.

Not Eligible

Eligible

If participant is happy to continue then randomise and use screening values as the baseline

Note time to surgery may vary from ~12 + weeks depending on tests and local variations

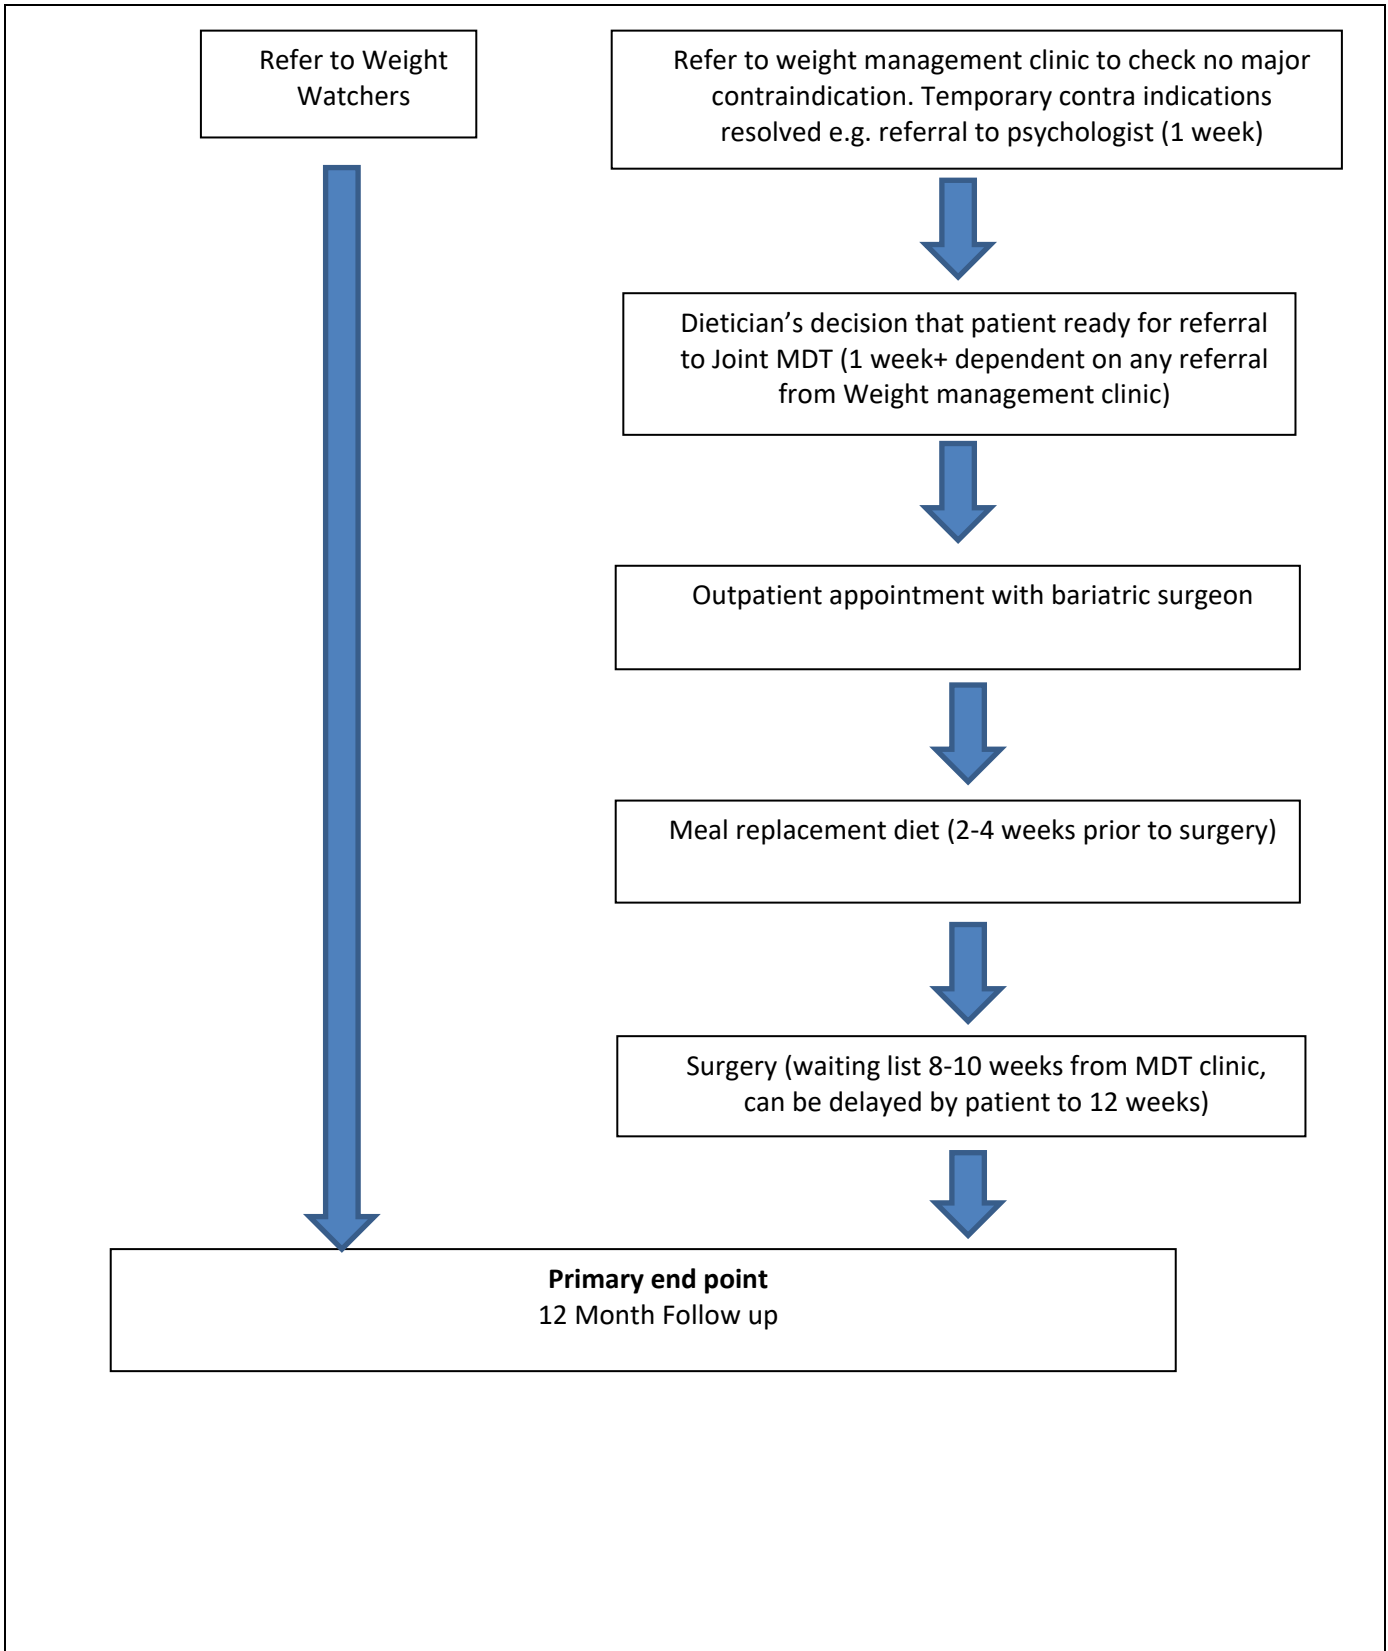



## Appendix C: Schedule of assessments

| Outcome                   | Measure                                | Pre-screening visit | Baseline | 3 months | 6 months | Post-op | (Primary endpoint) 12 months | 24 months | 60 months |
|---------------------------|----------------------------------------|---------------------|----------|----------|----------|---------|------------------------------|-----------|-----------|
| <b>Primary outcome</b>    |                                        |                     |          |          |          |         |                              |           |           |
| Intracranial pressure     | Lumbar puncture                        |                     | x        |          |          | x       | x                            | x         | x         |
| <b>Secondary outcomes</b> |                                        |                     |          |          |          |         |                              |           |           |
| Eligibility               | Pregnancy test                         |                     | x        |          |          |         |                              |           |           |
| Weight                    | BMI                                    |                     | x        | x        | x        | x       | x                            | x         | x         |
|                           | Waist/hip ratio                        |                     | x        | x        | x        | x       | x                            | x         | x         |
|                           | Blood pressure                         |                     | x        | x        | x        | x       | x                            | x         | x         |
|                           | Fat Mass                               |                     | x        | x        | x        | x       | x                            | x         | x         |
| Visual assessments        | Visual acuity and contrast sensitivity |                     | x        |          |          |         | x                            | x         | x         |
|                           | Humphrey visual field (24-2)           |                     | x        |          |          |         | x                            | x         | x         |
|                           | Ishihara colour assessment             |                     | x        |          |          |         | x                            | x         | x         |
|                           | Optical coherence tomography           |                     | x        |          |          |         | x                            | x         | x         |
|                           | Retinal photographs                    | x                   |          |          |          |         | x                            | x         | x         |
| Headache assessments      | Headache Impact Test 6                 | x                   |          |          |          |         | x                            | x         | x         |
|                           | Post-LP Headache diary                 |                     | x        |          |          | x       | x                            | x         | x         |
|                           | Headache diary                         | x                   |          |          |          |         | x                            | x         | x         |
| Quality of Life           | EQ-5D-5L                               |                     | x        |          |          |         | x                            | x         | x         |
|                           | ICECAP-A                               |                     | x        |          |          |         | x                            | x         | x         |
|                           | SF-36 Version 1                        |                     | x        |          |          |         | x                            | x         | x         |
|                           | HADS                                   |                     | x        |          |          |         | x                            | x         | x         |

|                  |                                                |   |   |   |   |   |   |   |  |
|------------------|------------------------------------------------|---|---|---|---|---|---|---|--|
|                  | Allodynia Symptom Checklist-12                 |   | x |   |   | x | x | x |  |
| Health Economics | Cost-effectiveness, -utility and -benefit      |   | x |   |   | x | x | x |  |
| Biomarkers       | Blood                                          |   | x |   | x | x | x | x |  |
|                  | CSF                                            |   | x |   | x | x | x | x |  |
|                  | Meal stimulation                               |   | x |   | x | x | x | x |  |
| Sleep apnoea     |                                                |   |   |   |   |   |   |   |  |
|                  | Epworth Sleepiness Scale, Berlin questionnaire | - | x |   |   | x |   |   |  |
|                  | STOP-BANG                                      | x |   |   |   | x |   |   |  |
| SAE monitoring   | SAE forms                                      |   | x | x | x | x | x | x |  |

## Appendix D: Template report

A template report for the final analyses will be provided in a separate document.

84

85
