# Supplementary material for: Effectiveness of Bariatric Surgery vs Community Weight Management Intervention for the Treatment of Idiopathic Intracranial Hypertension: A Randomized Clinical Trial
Source: PubMed Central journal article supplement (PMC8077040; doi:10.1001/jamaneurol.2021.0659), 2021-04-26
Supplement: jamaneurol-e210659-s003.pdf [file jamaneurol-e210659-s003.pdf]

## Data Sharing Statement

### Data

**Data available:** Yes

**Data types:** Deidentified participant data

**How to access data:** [a.b.sinclair@bham.ac.uk](mailto:a.b.sinclair@bham.ac.uk)

**When available:** beginning date: 12-01-2021, end date: 12-01-2024

### Supporting Documents

**Document types:** None

### Additional Information

**Who can access the data:** Individual participant data, after anonymization will be made available, along with the study protocol, statistical analysis plan and consent forms. Reasonable requests will provide data beginning 12 months and ending 3 years after publication of this article to researchers whose proposed use of the data is approved by the original study investigators. Proposals should be made to the corresponding author and requesters will need to sign a data access agreement.

**Types of analyses:** Reasonable requests will provide data beginning 12 months and ending 3 years after publication of this article to researchers whose proposed use of the data is approved by the original study investigators. Proposals should be made to the corresponding author and requesters will need to sign a data access agreement.

**Mechanisms of data availability:** Reasonable requests will provide data beginning 12 months and ending 3 years after publication of this article to researchers whose proposed use of the data is approved by the original study investigators. Proposals should be made to the corresponding author and requesters will need to sign a data access agreement.
